# Supplementary material for: Development of novel synthetic routes to bis(perfluoroalkyl)-substituted anthracene derivatives
Source: Royal Society of Chemistry journal article supplement (doi:10.1039/c3ra40974k), 2013-01-01

$^1\text{H}$  NMR for 9,10-bis(trifluoromethyl)-9,10-bis(trimethylsiloxy)-9,10-dihydroanthracene

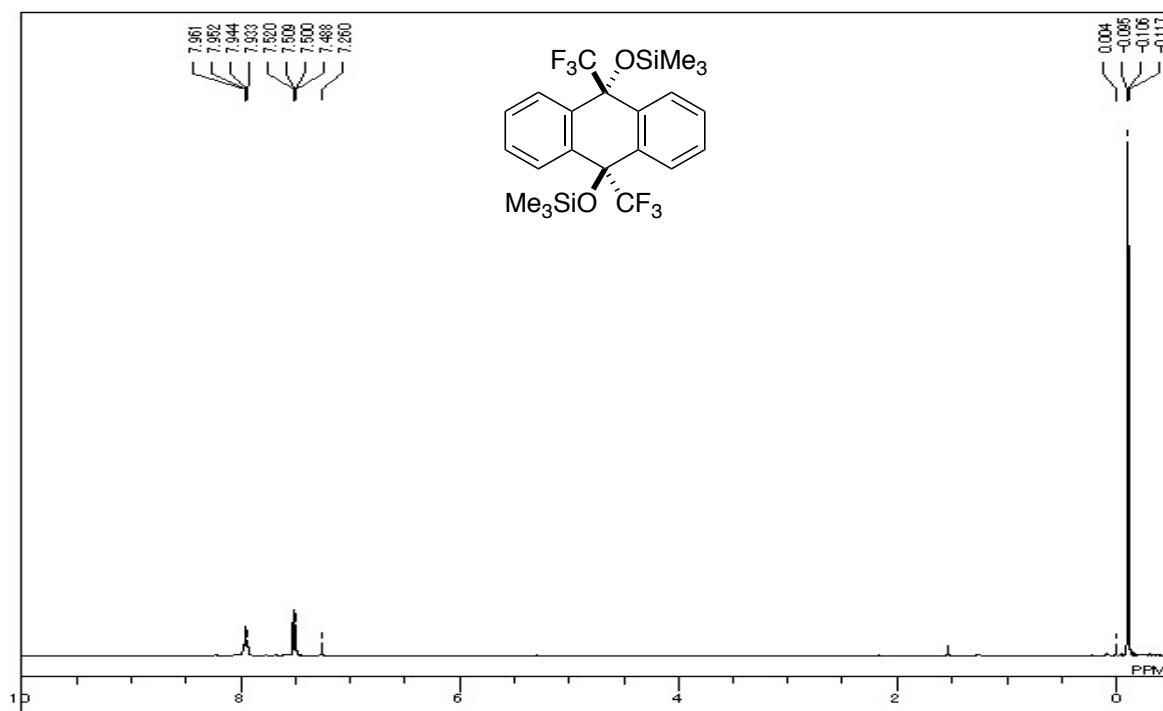

$^{13}\text{C}$  NMR for 9,10-bis(trifluoromethyl)-9,10-bis(trimethylsiloxy)-9,10-dihydroanthracene

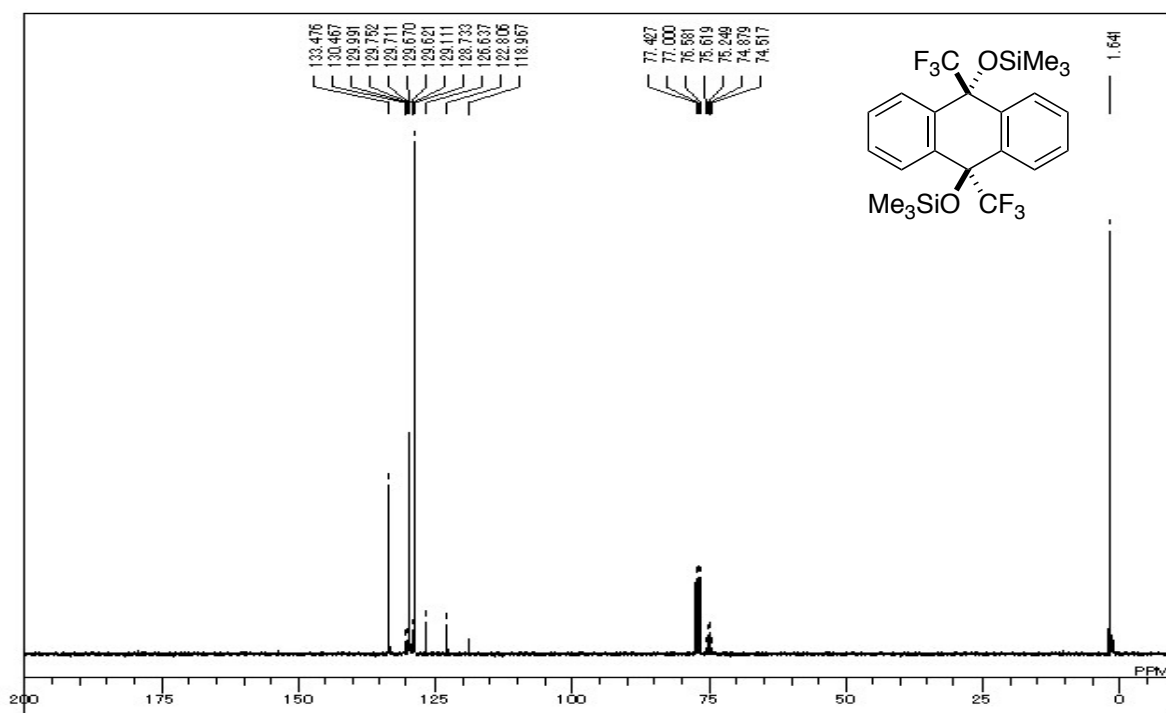

$^1\text{H}$  NMR for **2a**

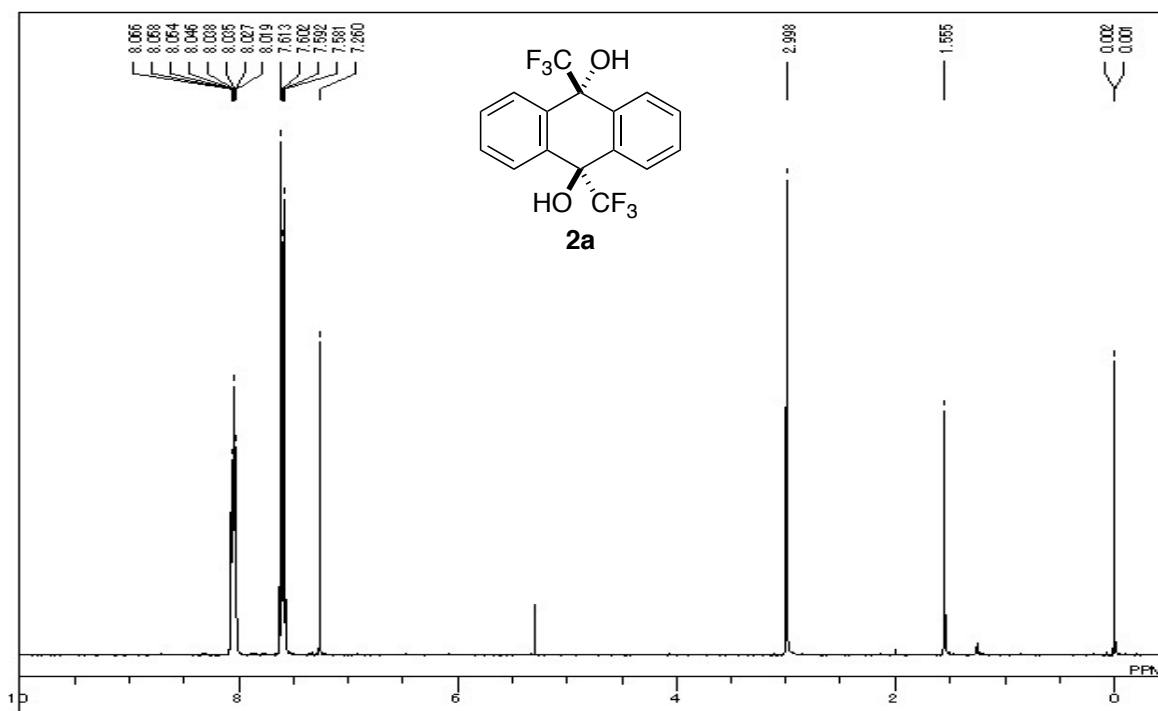

$^{13}\text{C}$  NMR for **2a**

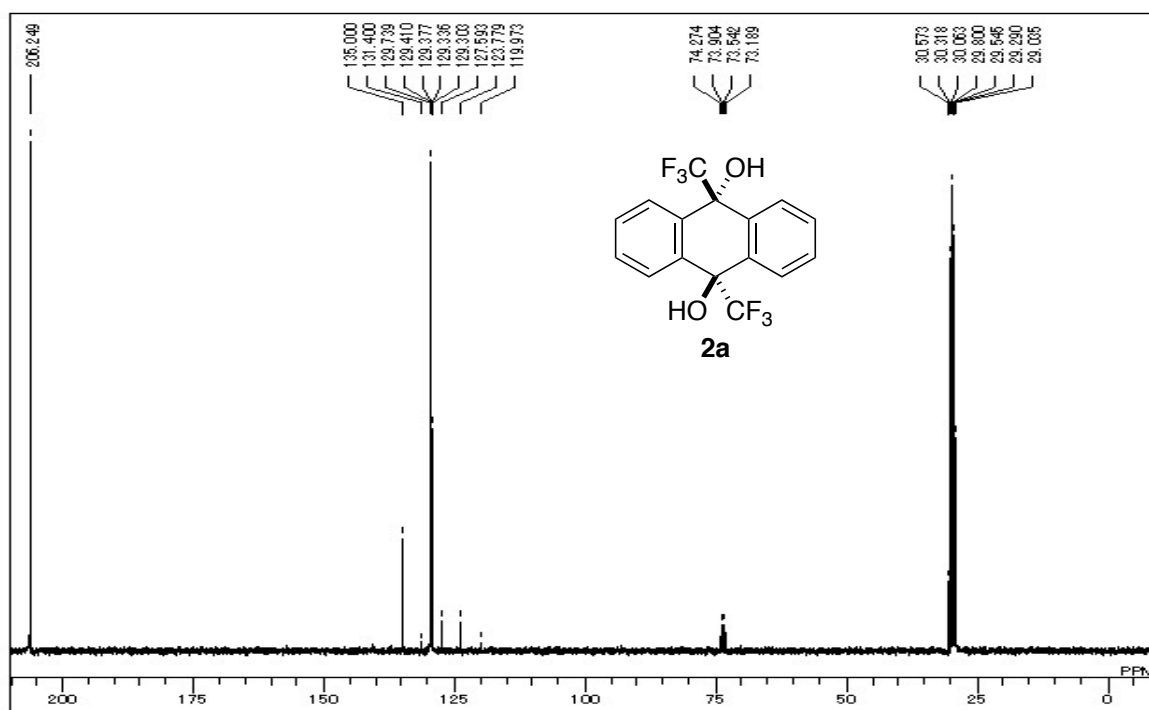

$^1\text{H}$  for **2b**

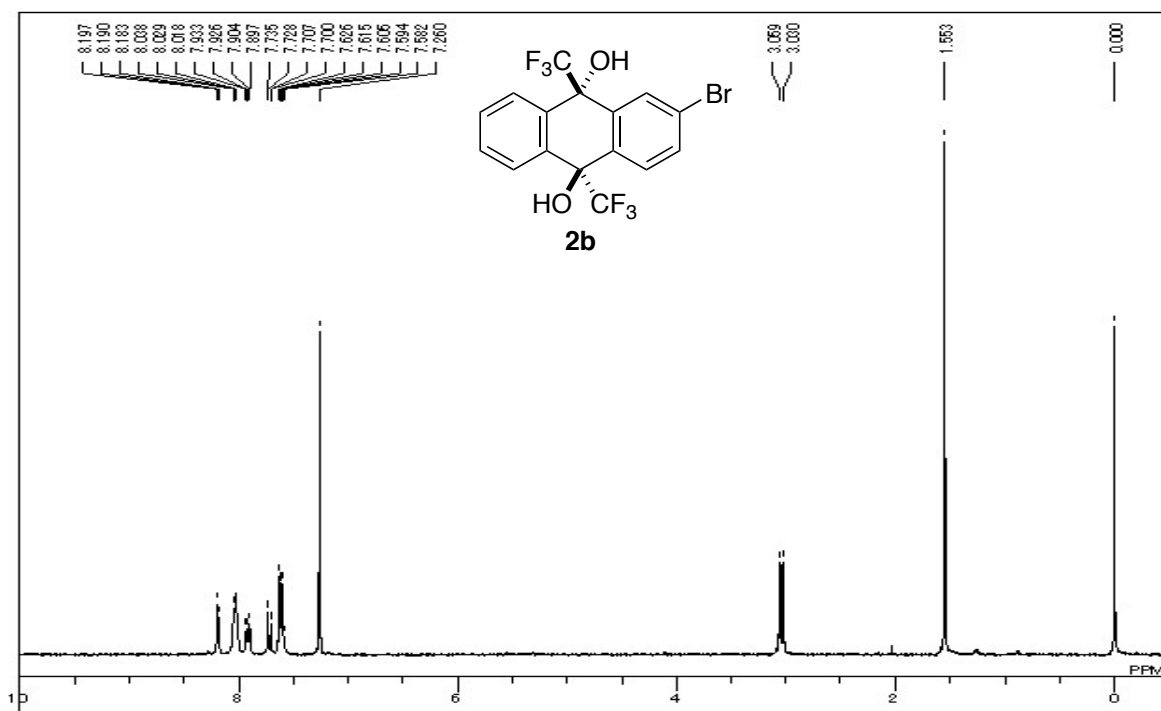

$^{13}\text{C}$  for **2b**

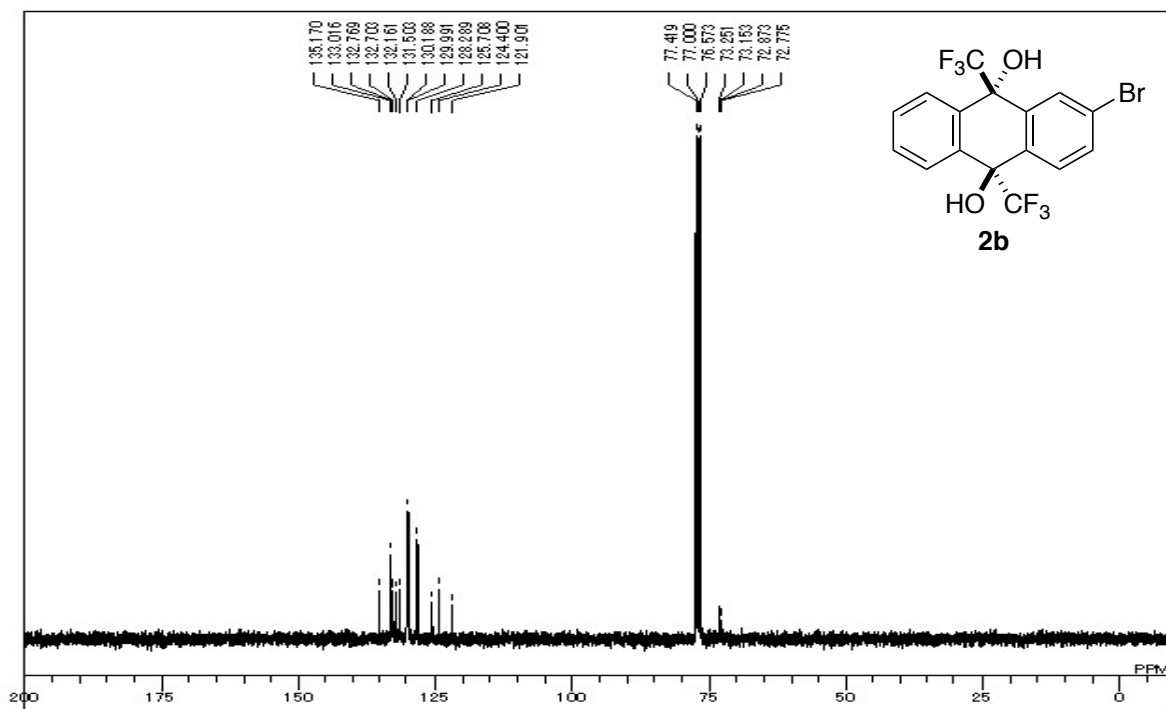

$^1\text{H}$  for **2c**

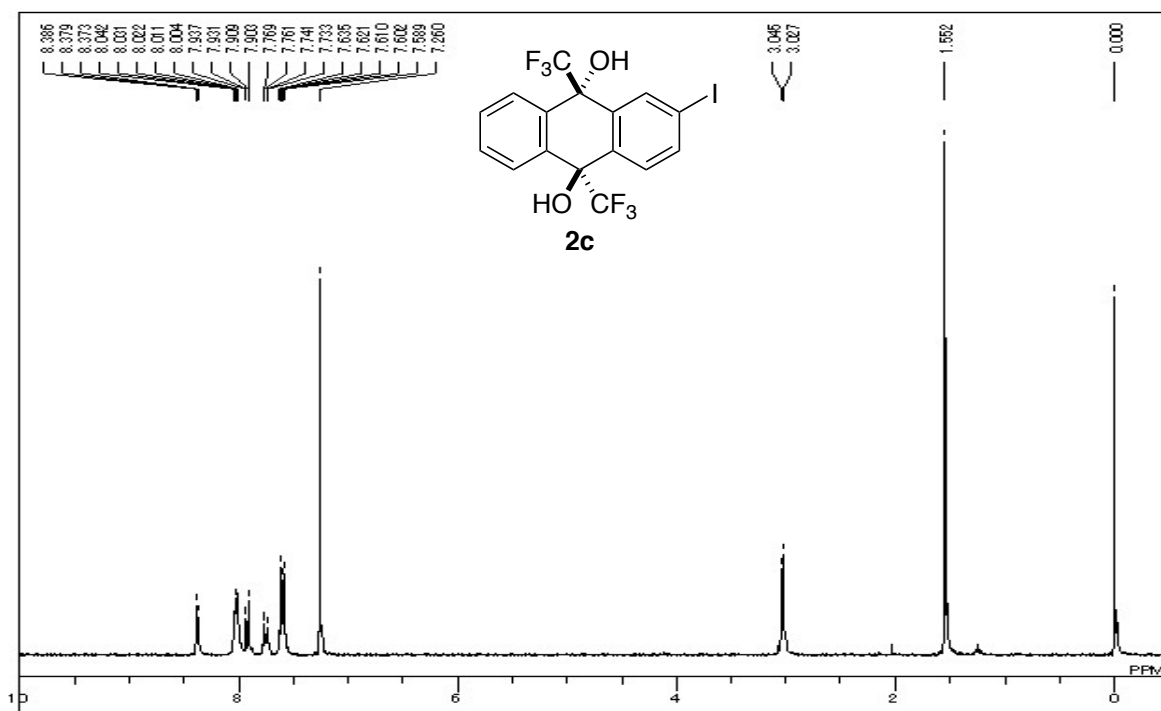

$^{13}\text{C}$  for **2c**

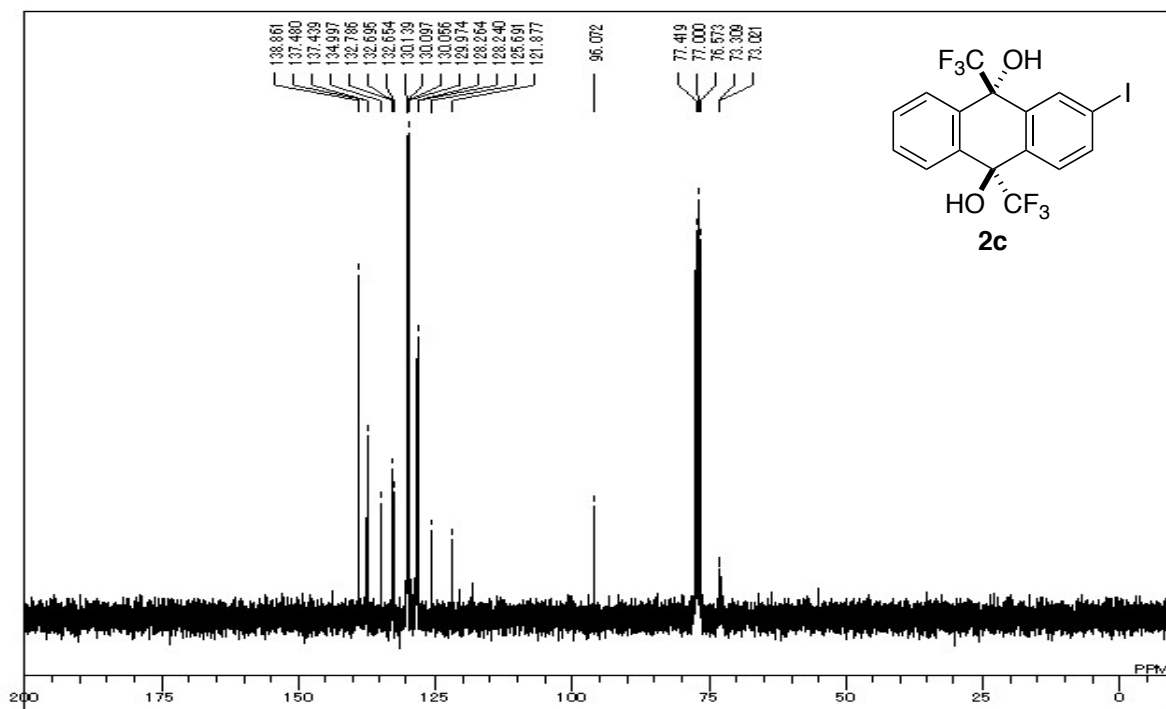

### $^1\text{H}$ NMR for **2d**

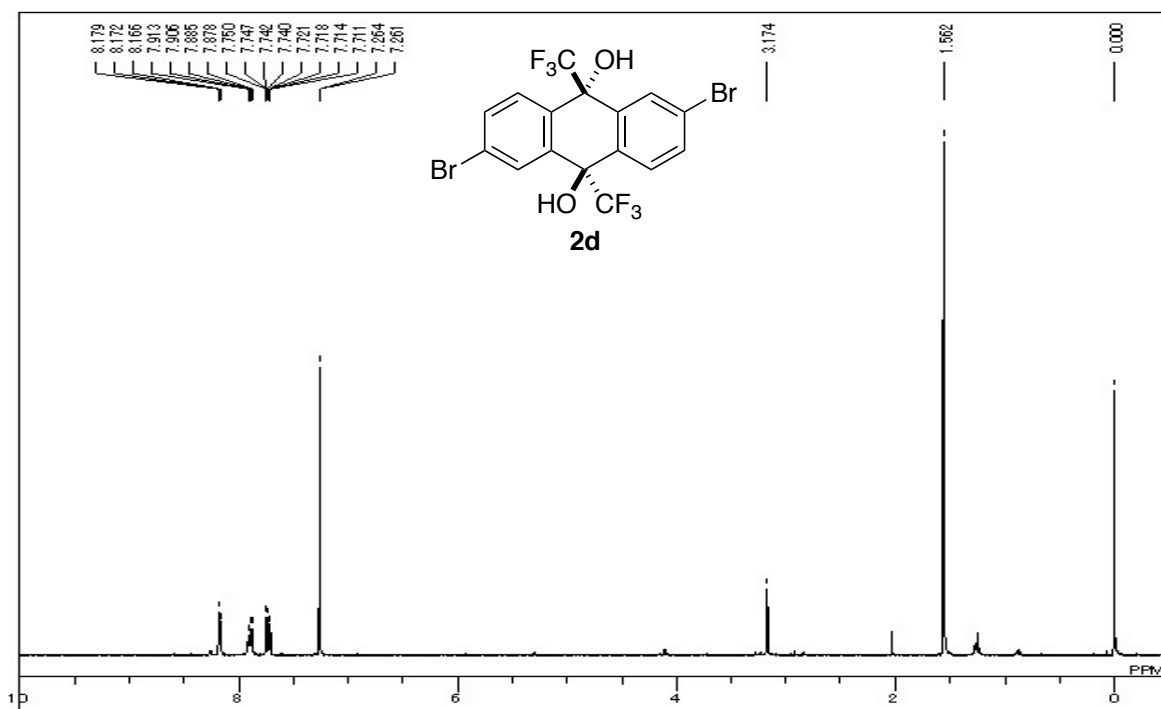

### $^{13}\text{C}$ for **2d**

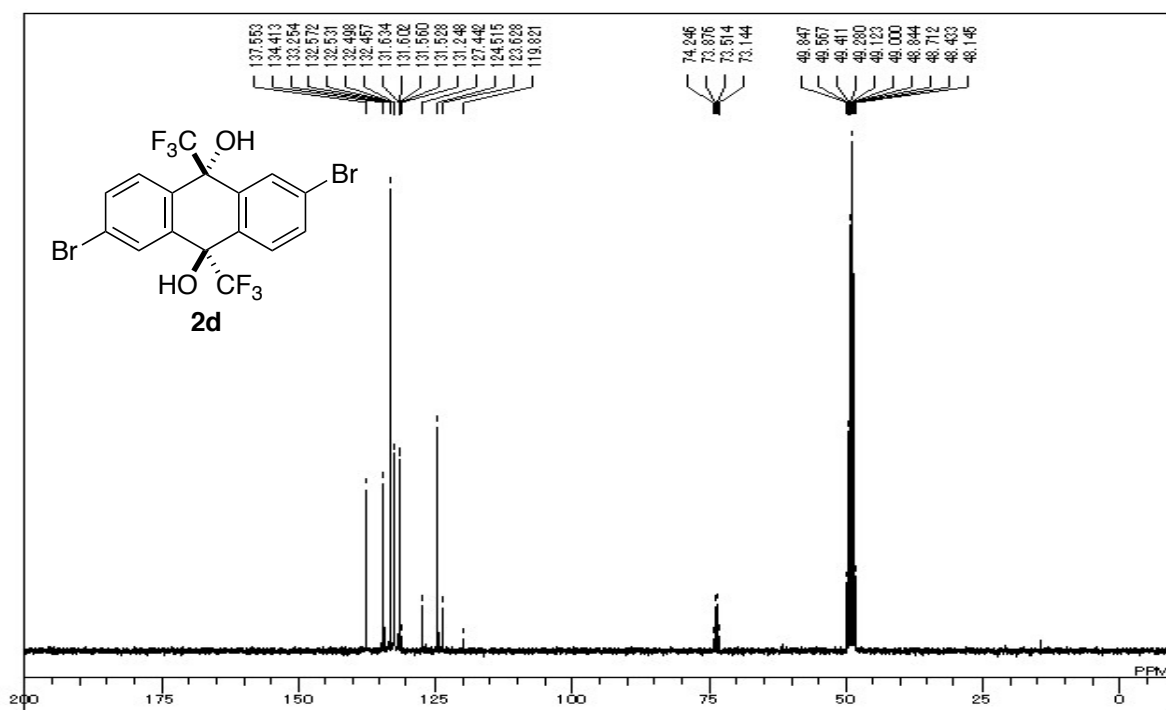

$^1\text{H}$  NMR for **2e**

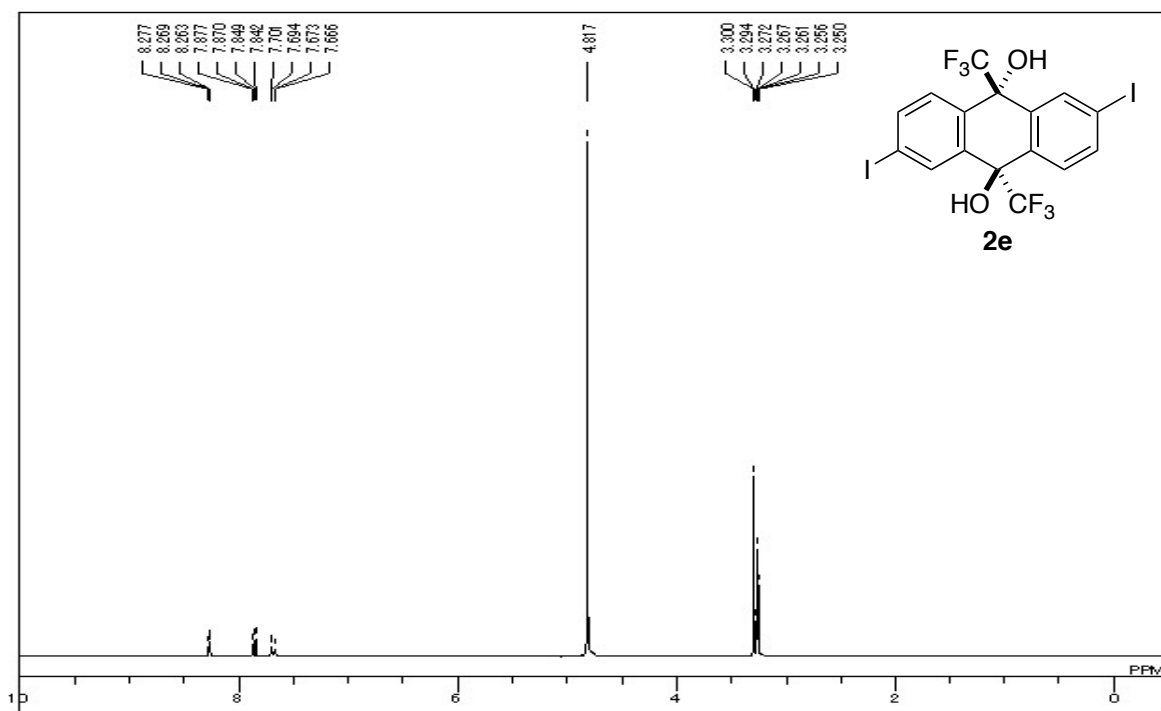

$^{13}\text{C}$  NMR for **2e**

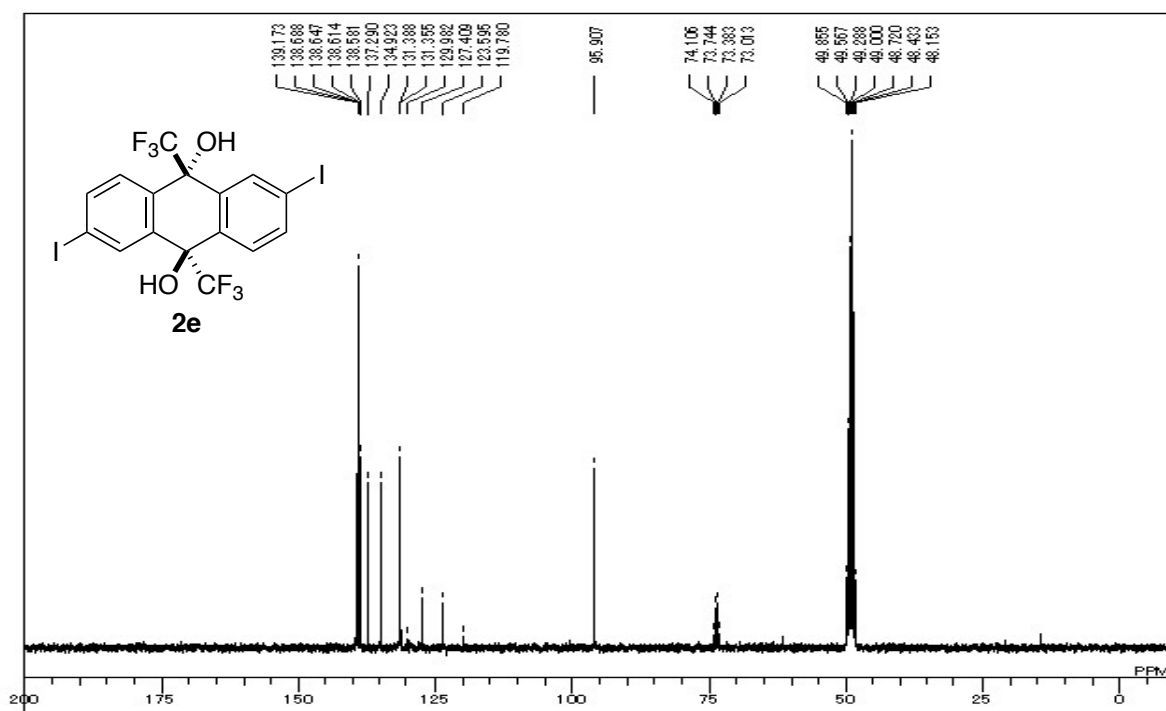

$^1\text{H}$  NMR for **3a**

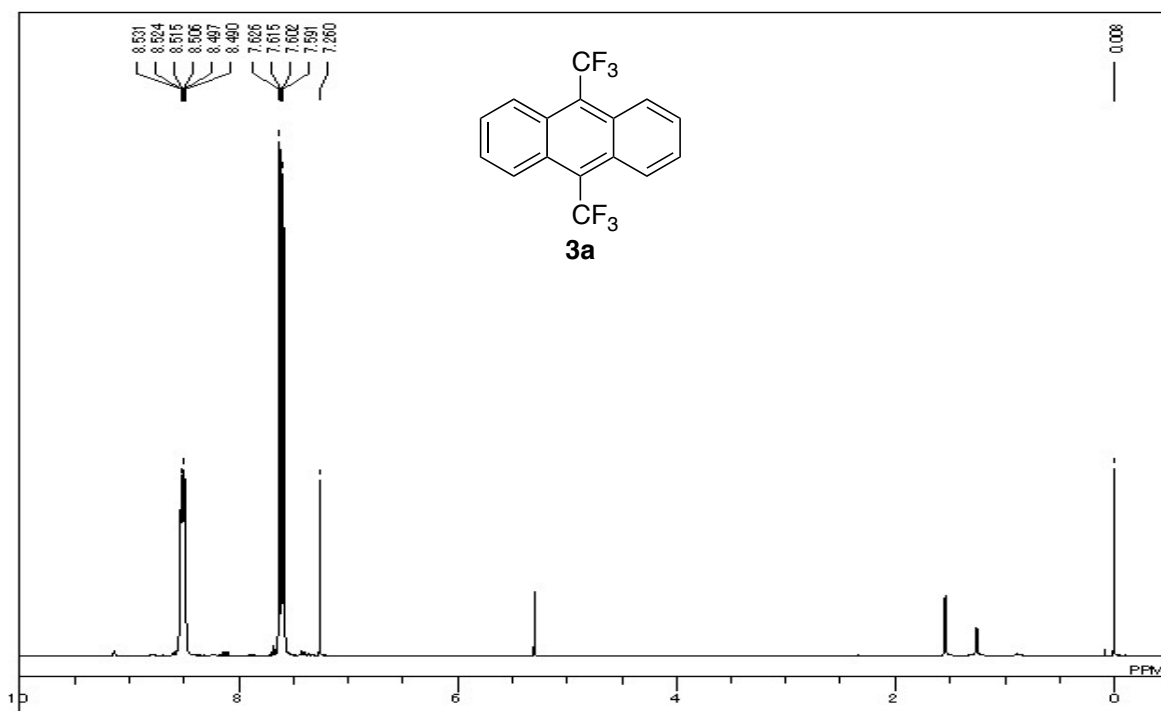

$^{13}\text{C}$  NMR for **3a**

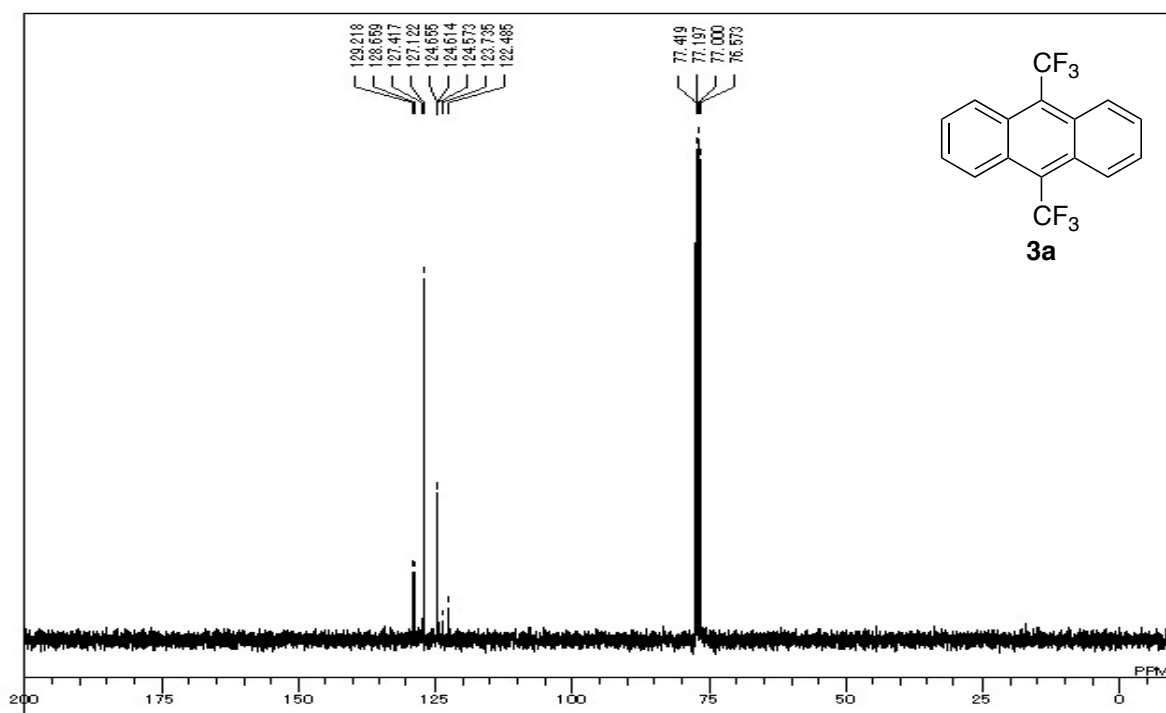

### $^1\text{H}$ NMR for **3b**

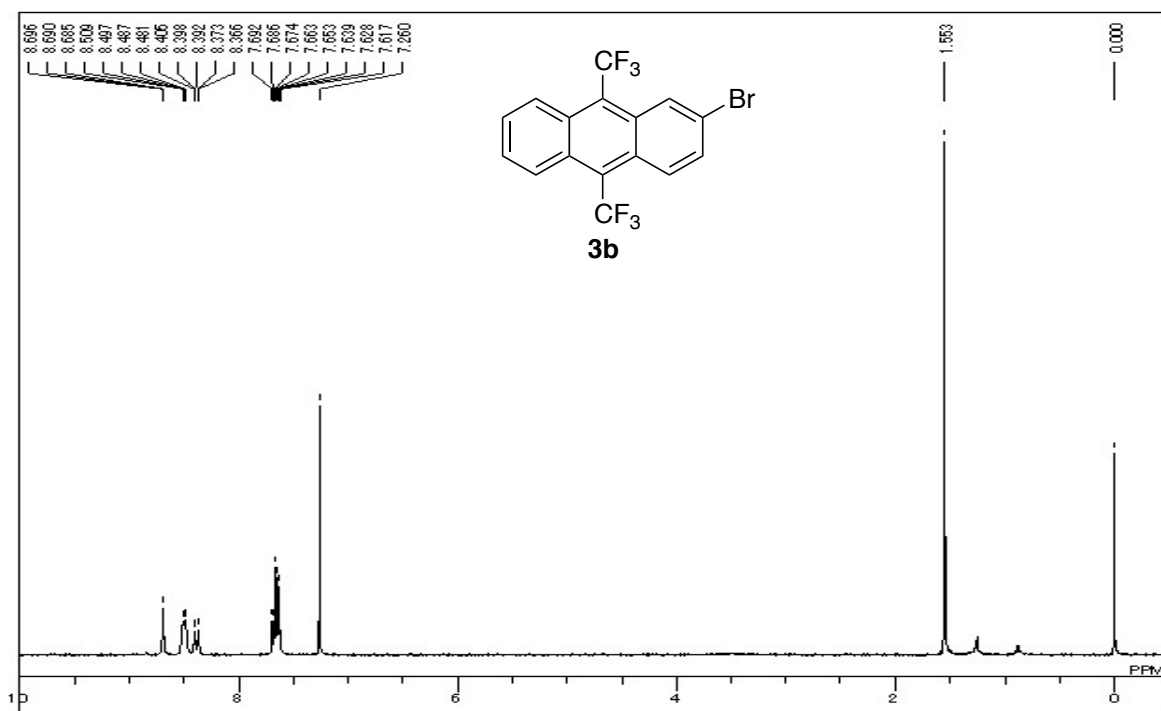

### $^{13}\text{C}$ NMR for **3b**

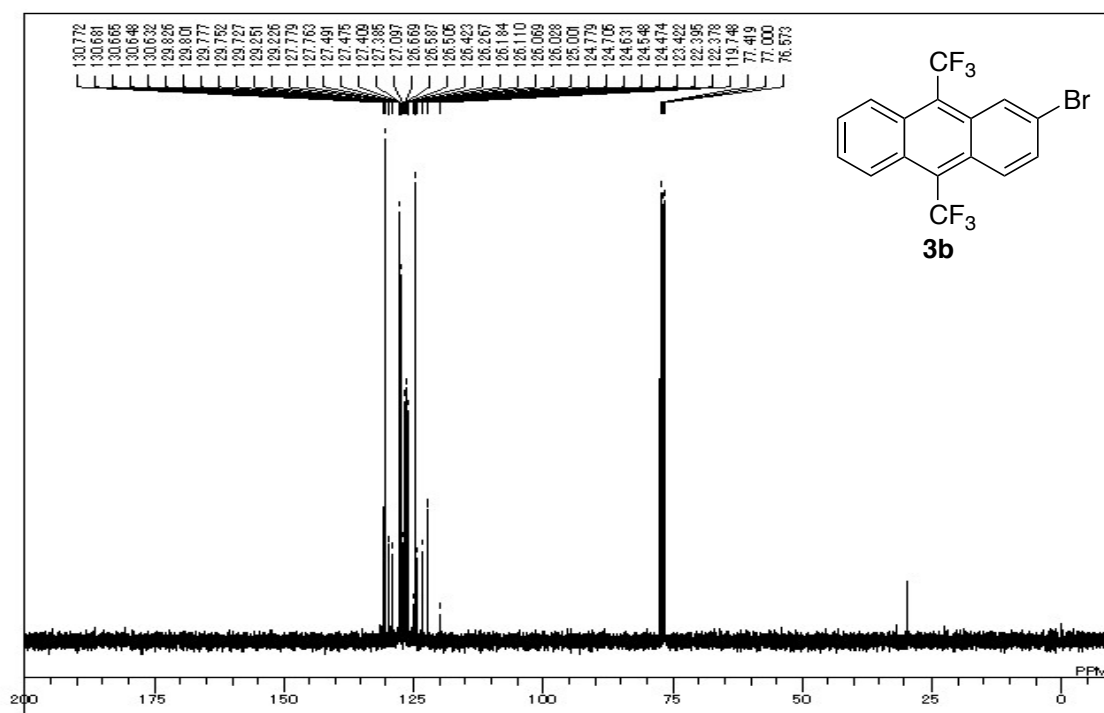



### $^1\text{H}$ NMR for **3c**

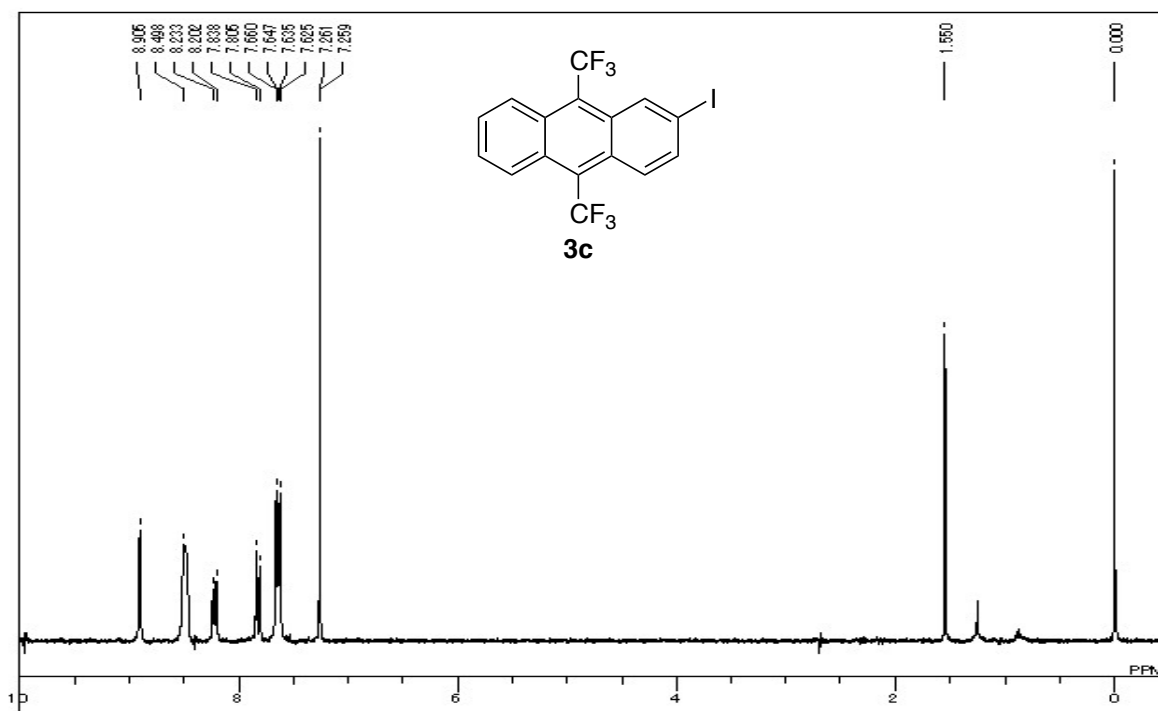

### $^{13}\text{C}$ NMR for **3c**

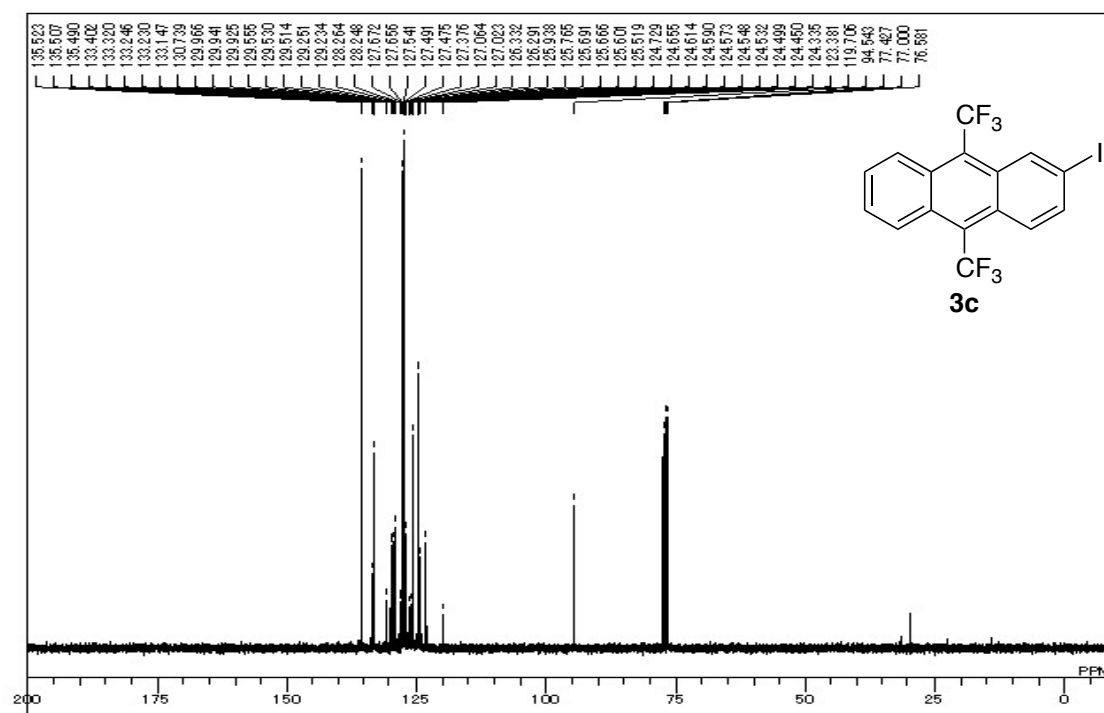

### $^1\text{H}$ NMR for **3d**

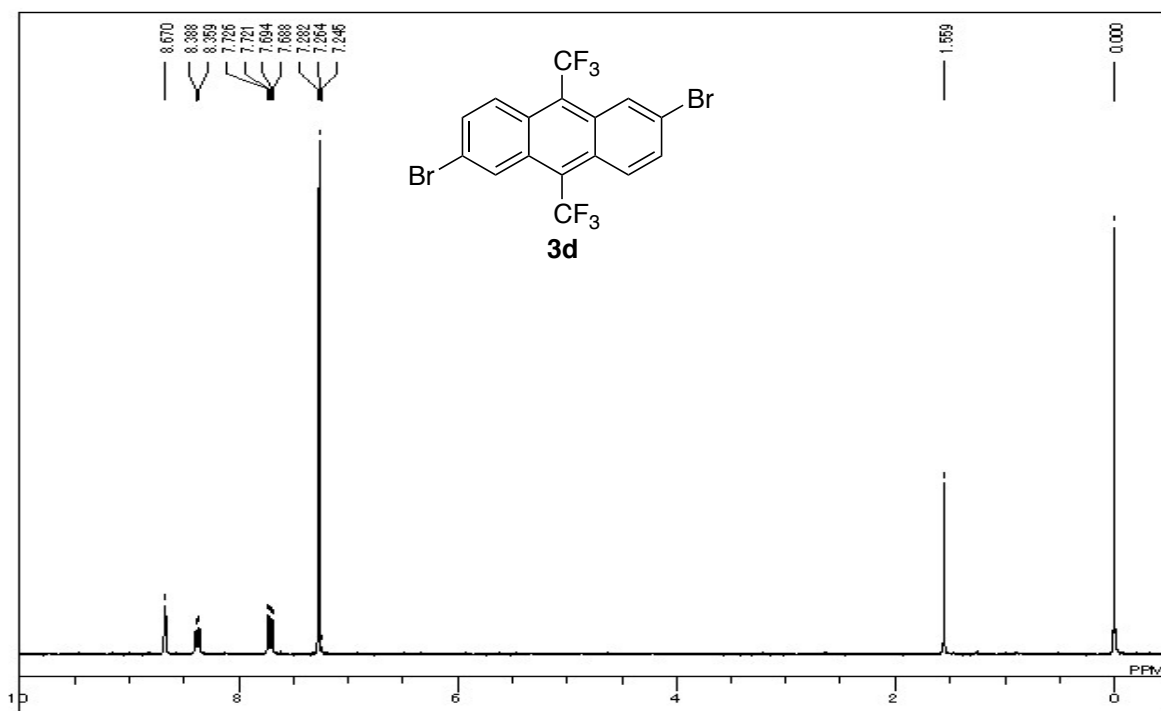

### $^{13}\text{C}$ NMR for **3d**

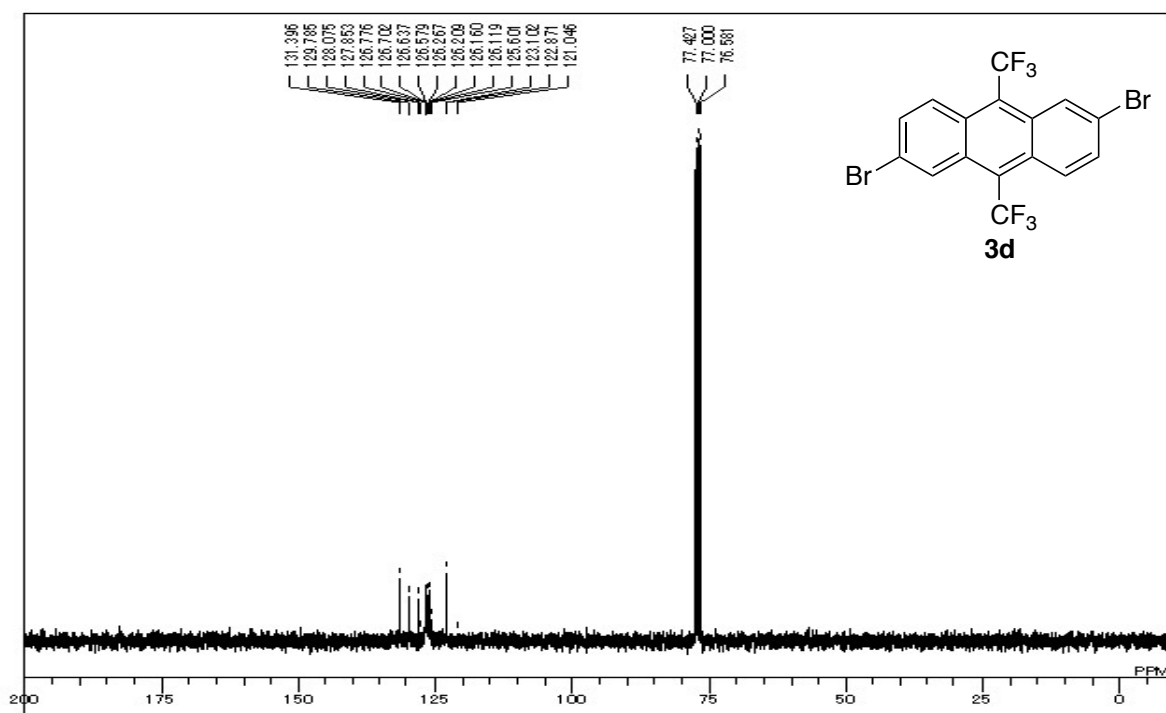

$^1\text{H}$  NMR for **3e**

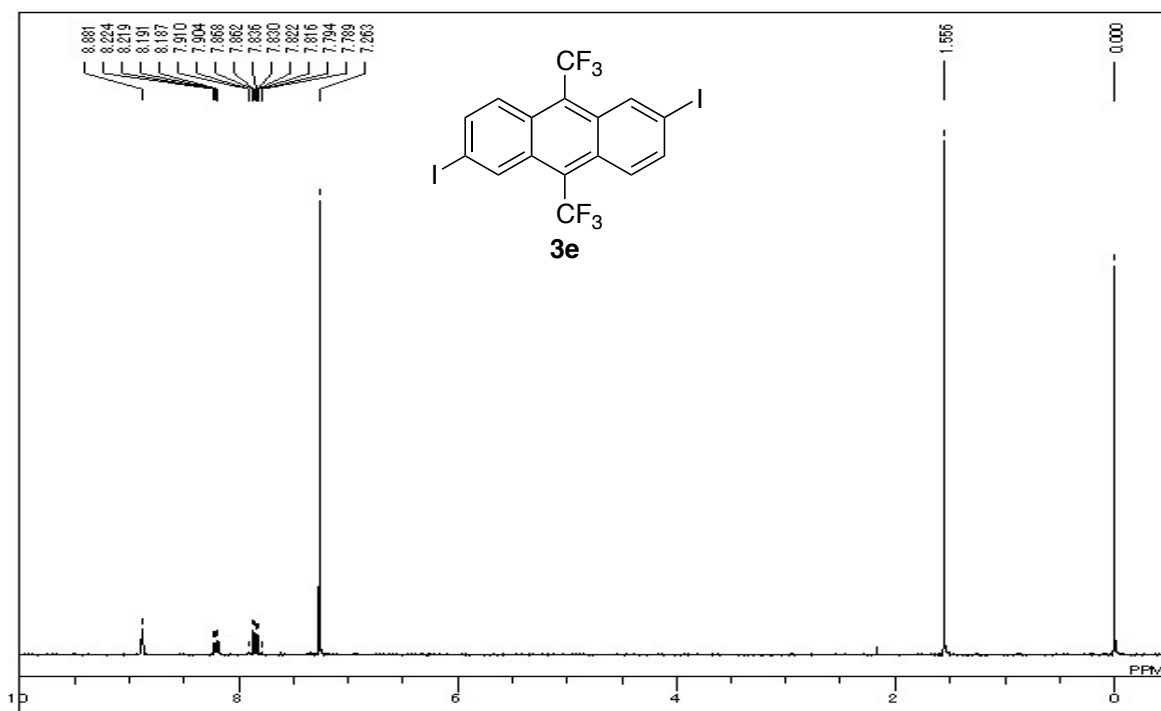

$^{13}\text{C}$  NMR for **3e**

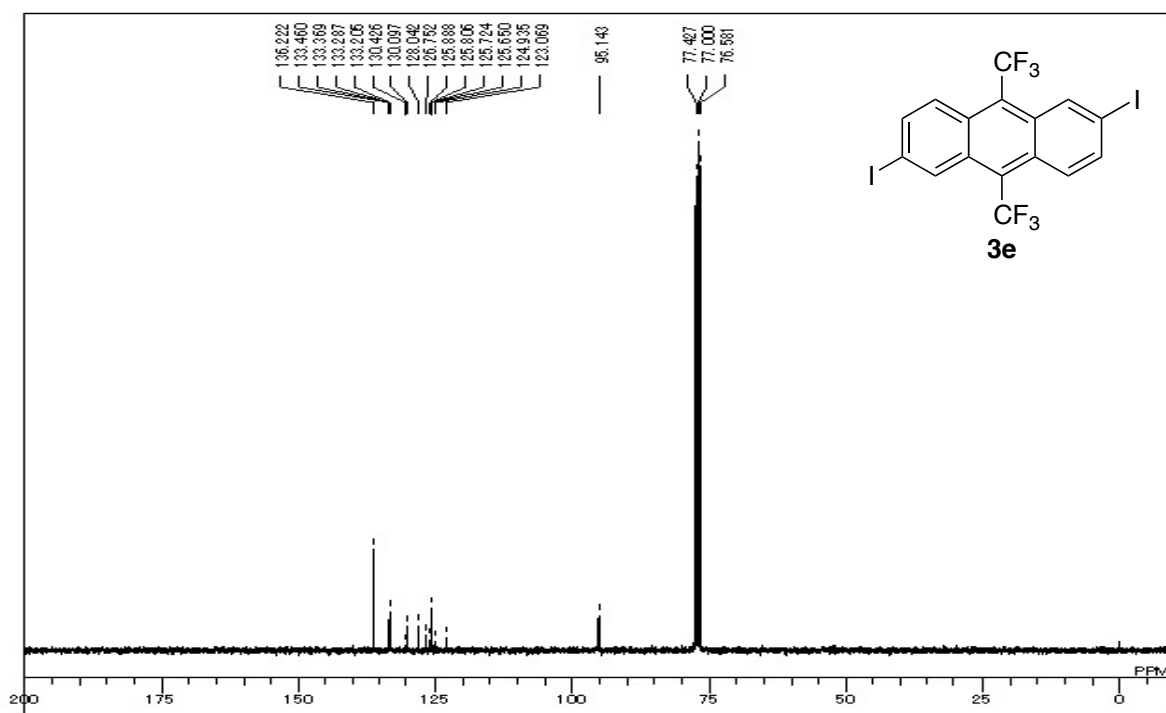

### $^1\text{H}$ NMR for **3f**

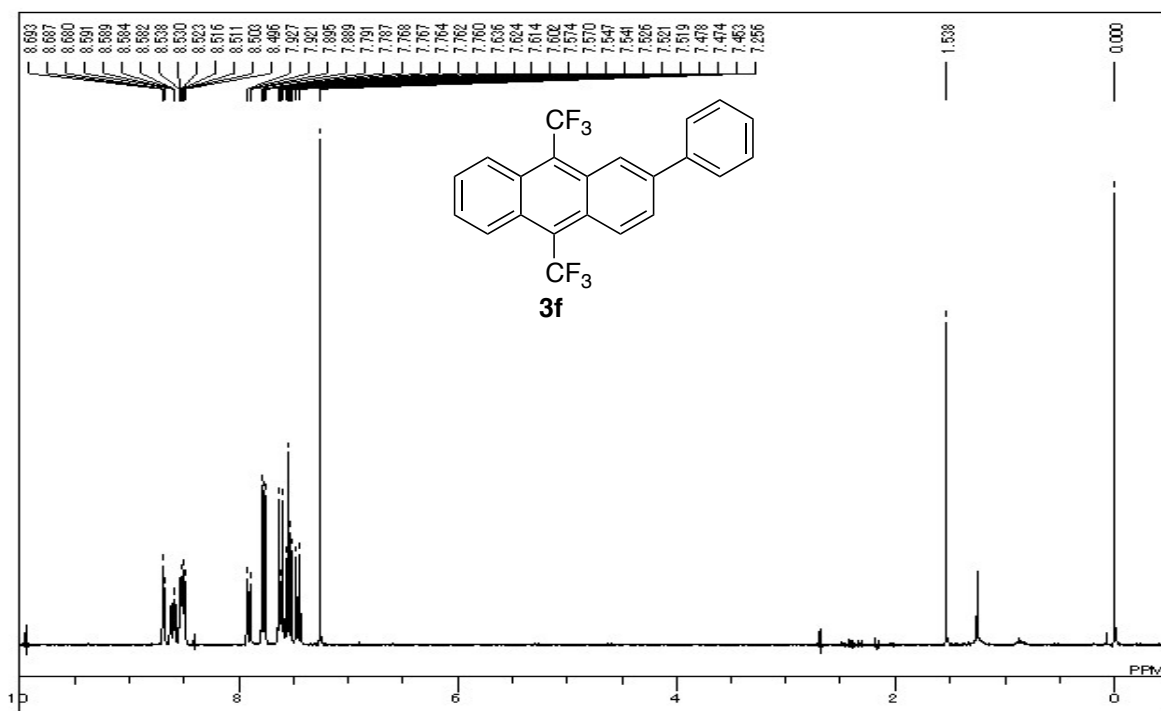

### $^{13}\text{C}$ NMR for **3f**

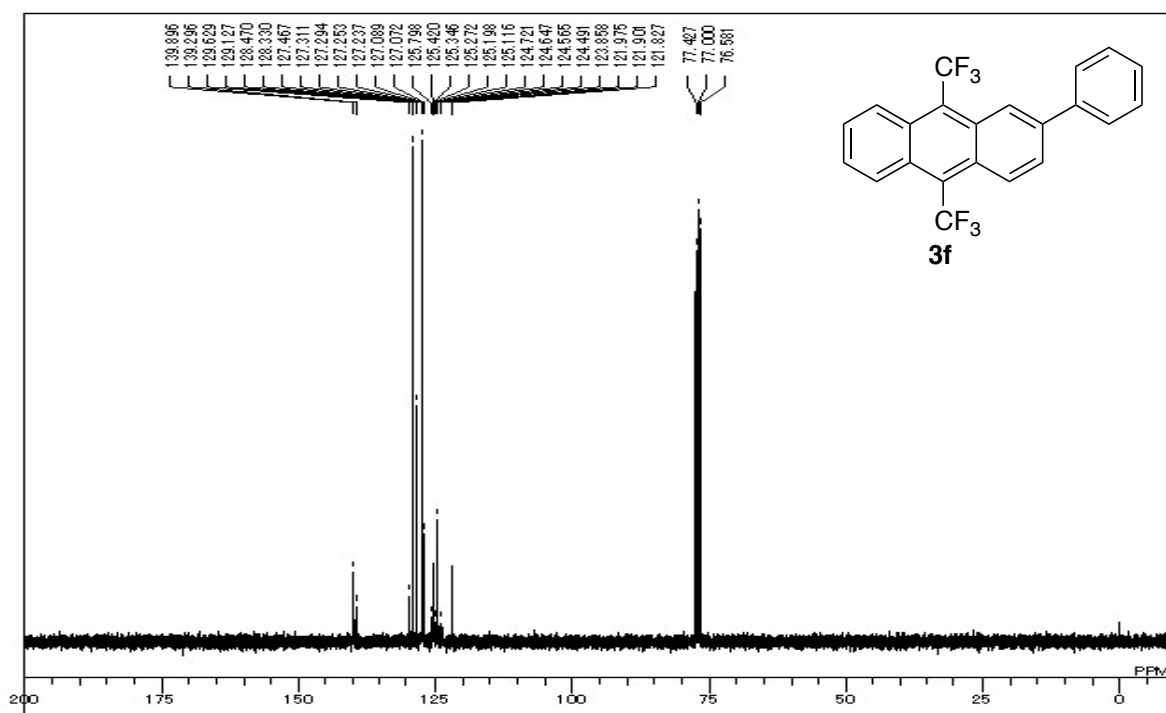

$^1\text{H}$  NMR for **3g**

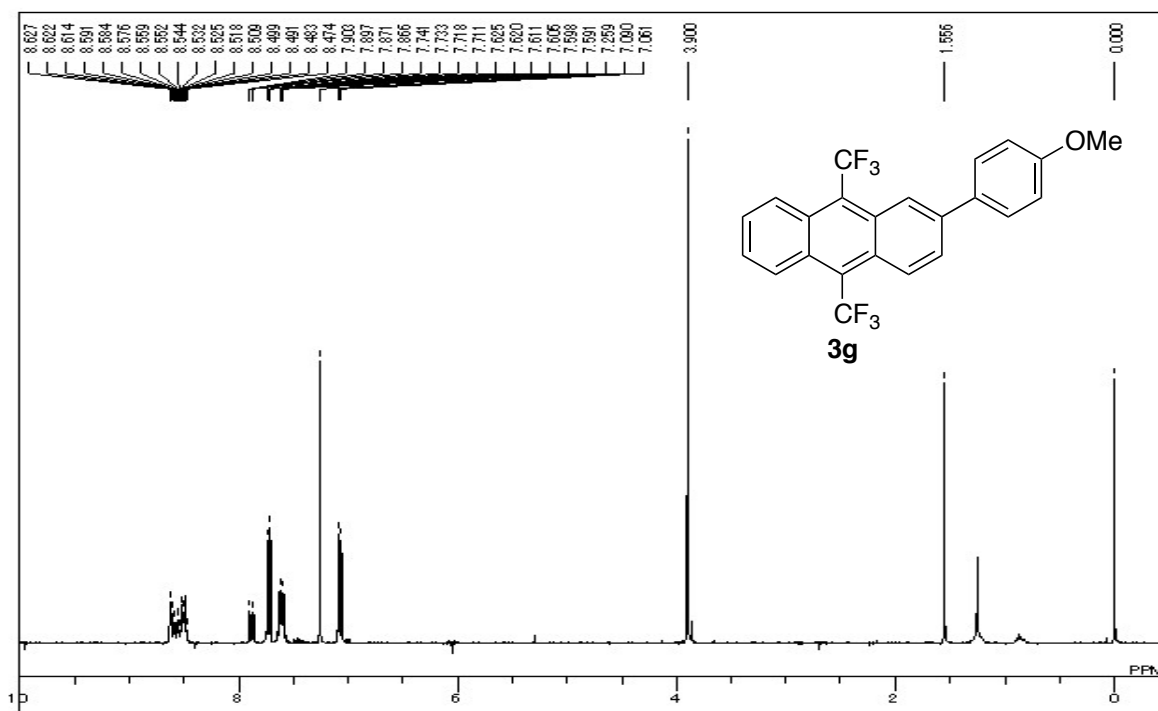

$^{13}\text{C}$  NMR for **3g**

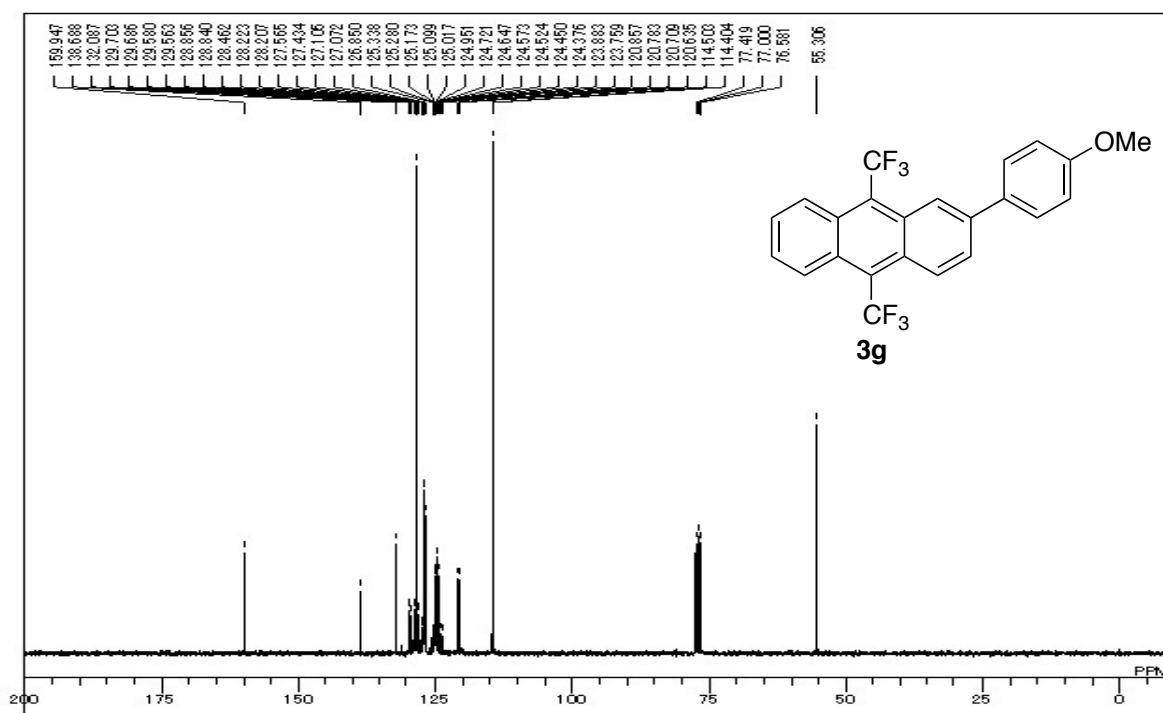

### <sup>1</sup>H NMR for **3h**

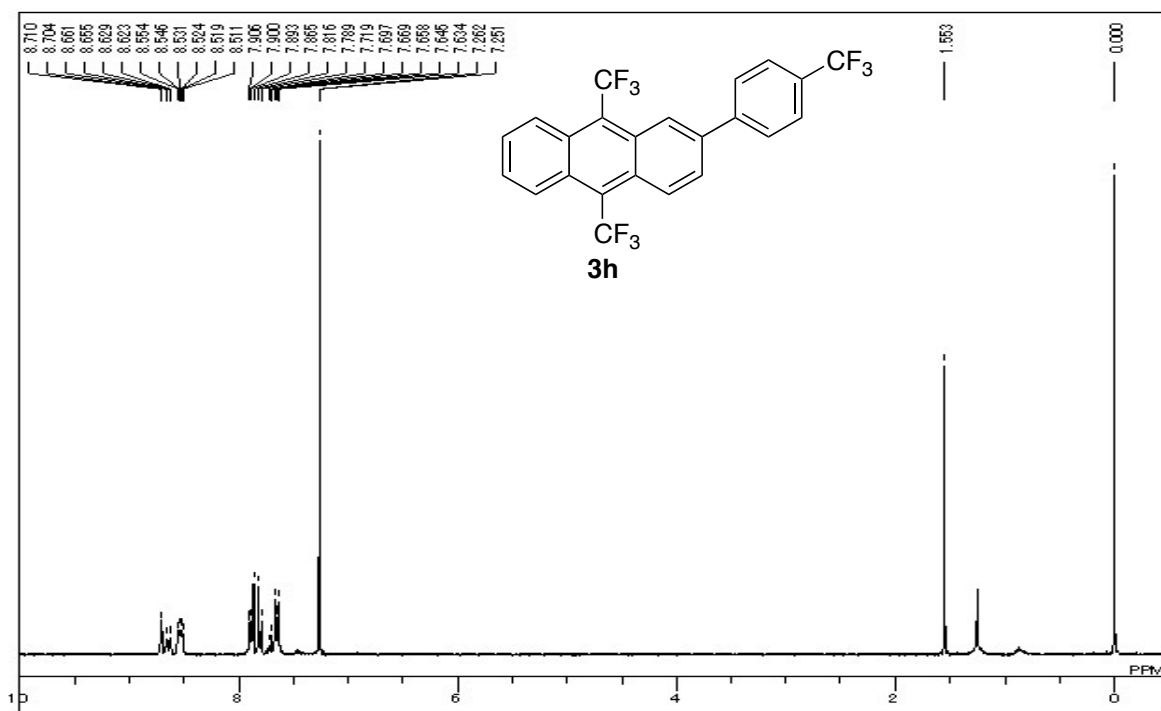

### <sup>13</sup>C NMR for **3h**

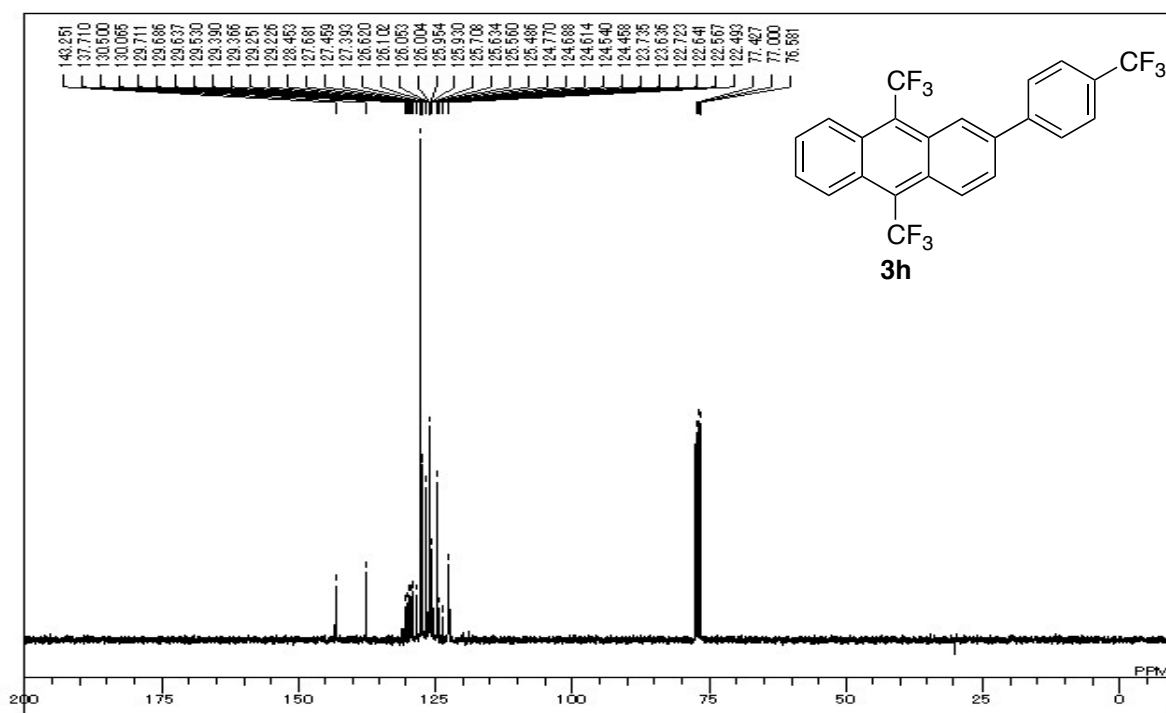

### <sup>1</sup>H NMR for **3i**

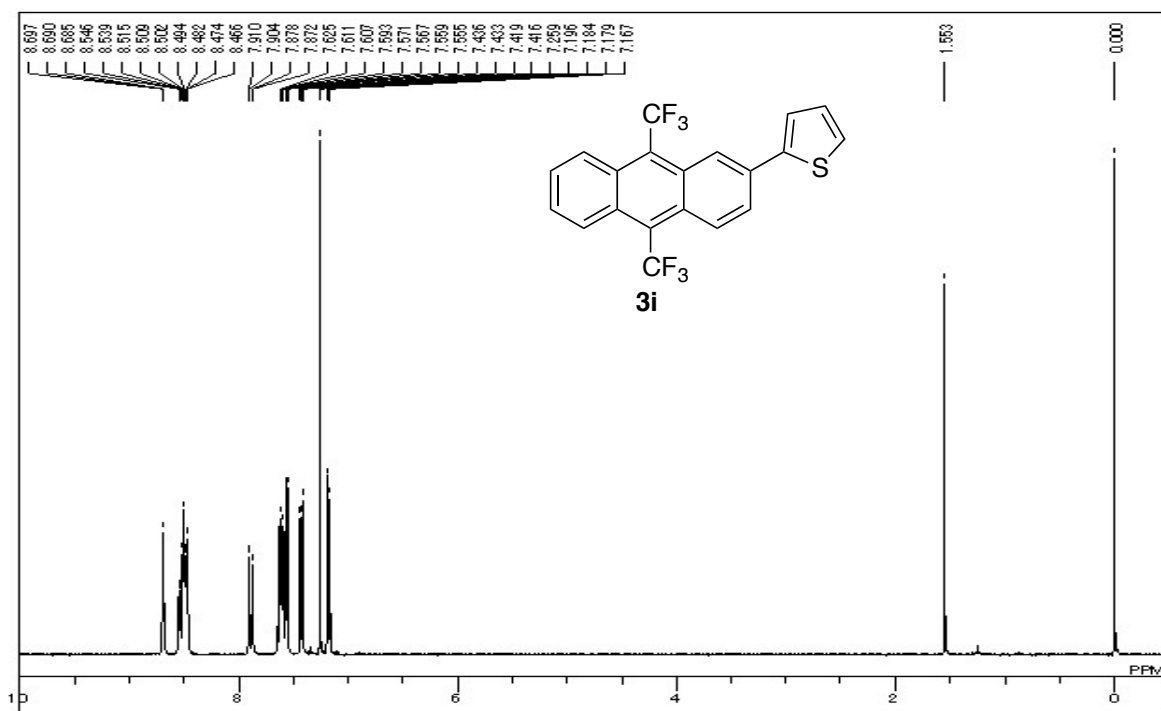

### <sup>13</sup>C NMR for **3i**

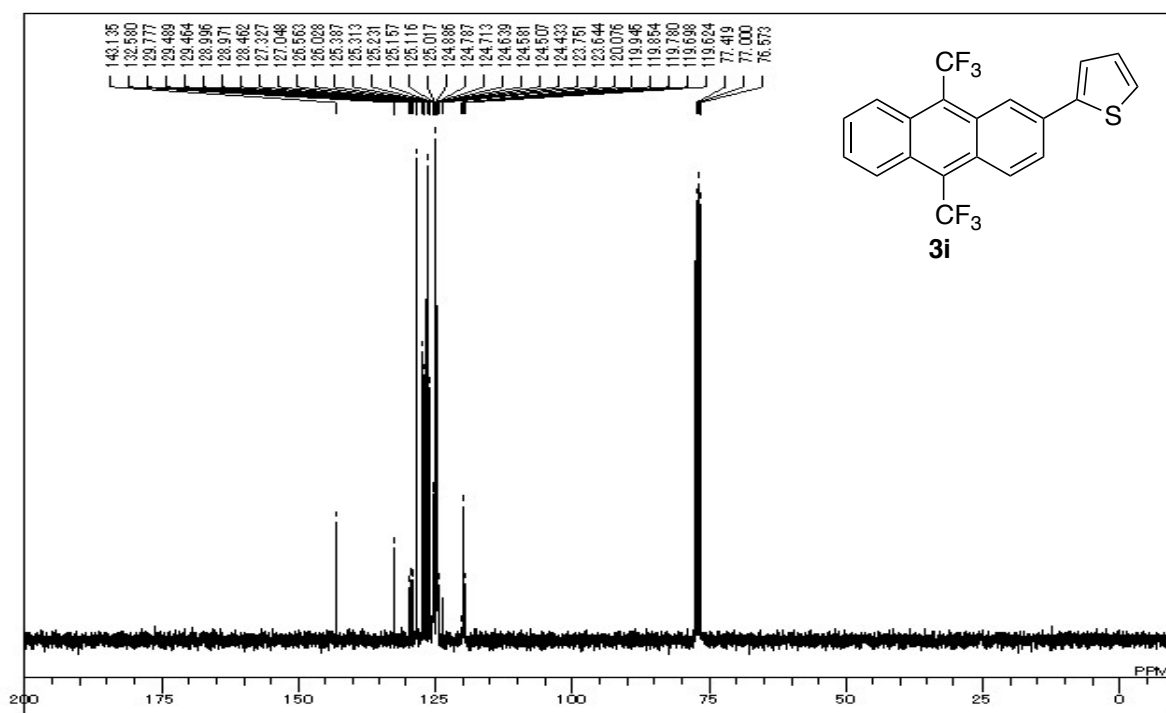

### <sup>1</sup>H NMR for **3j**

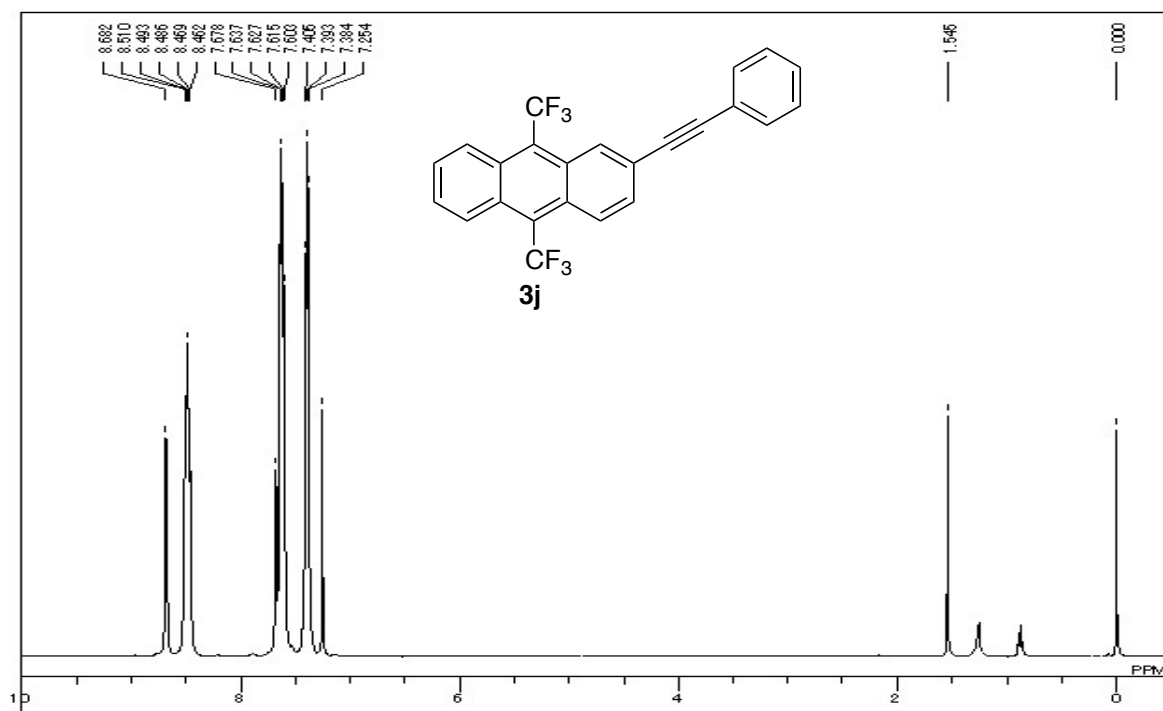

### <sup>13</sup>C NMR for **3j**

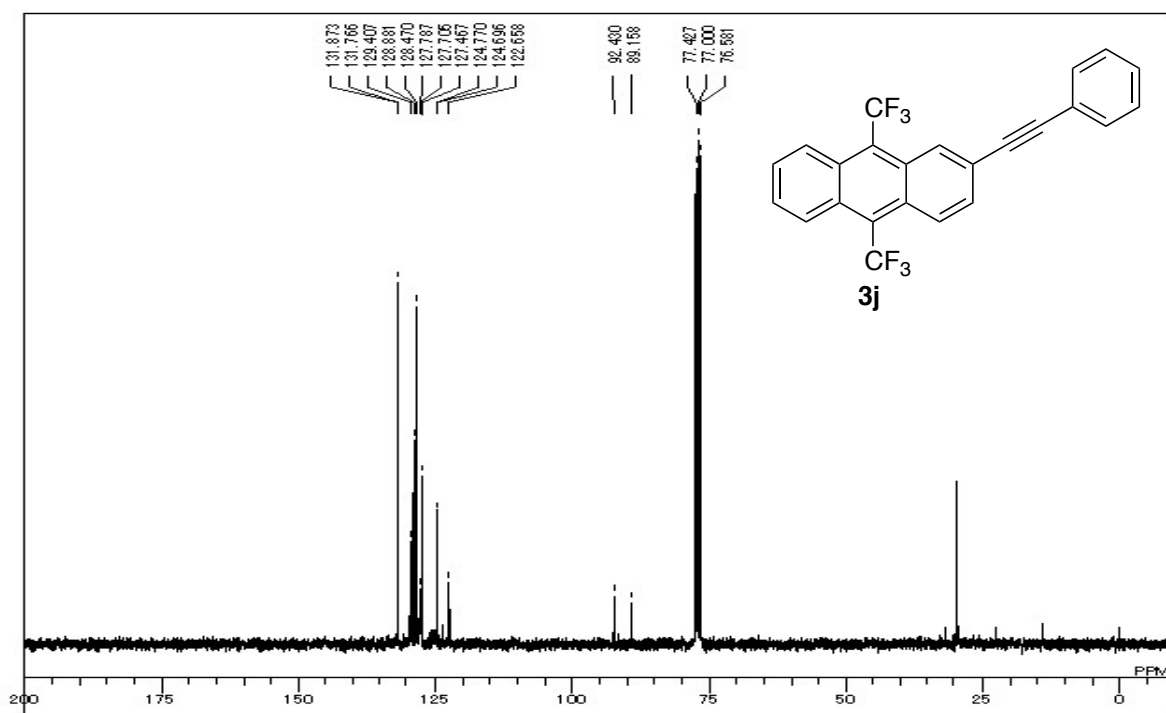



### $^1\text{H}$ NMR for **3k**

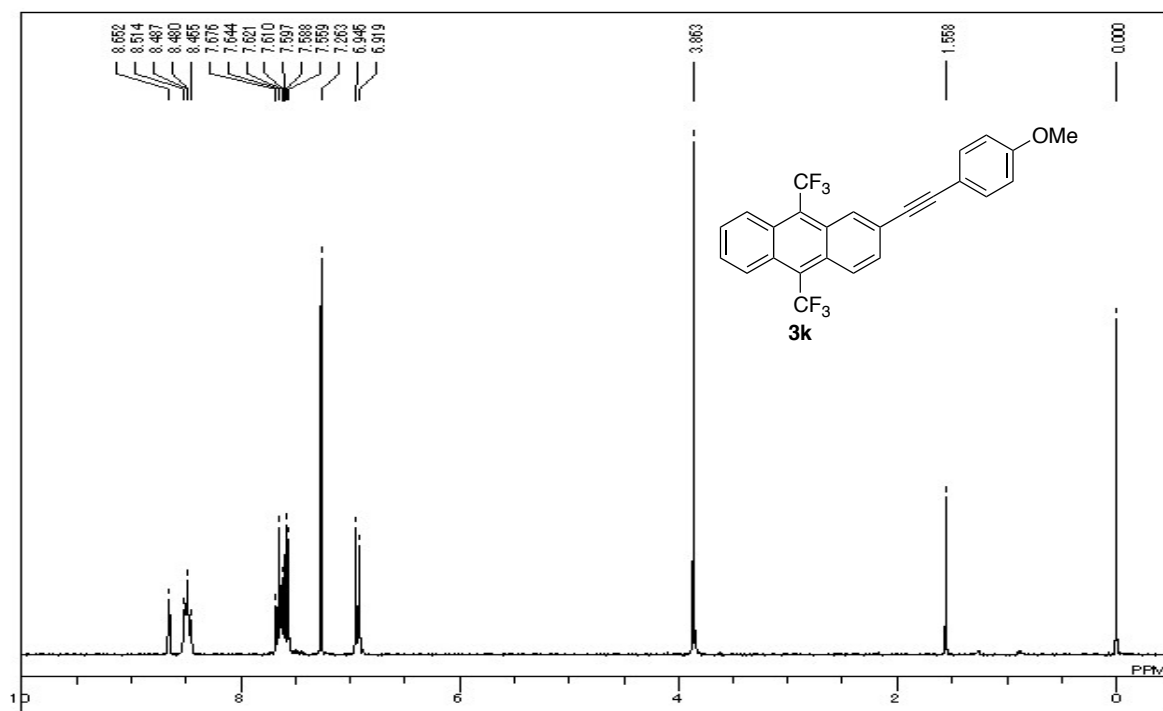

### $^{13}\text{C}$ NMR for **3k**

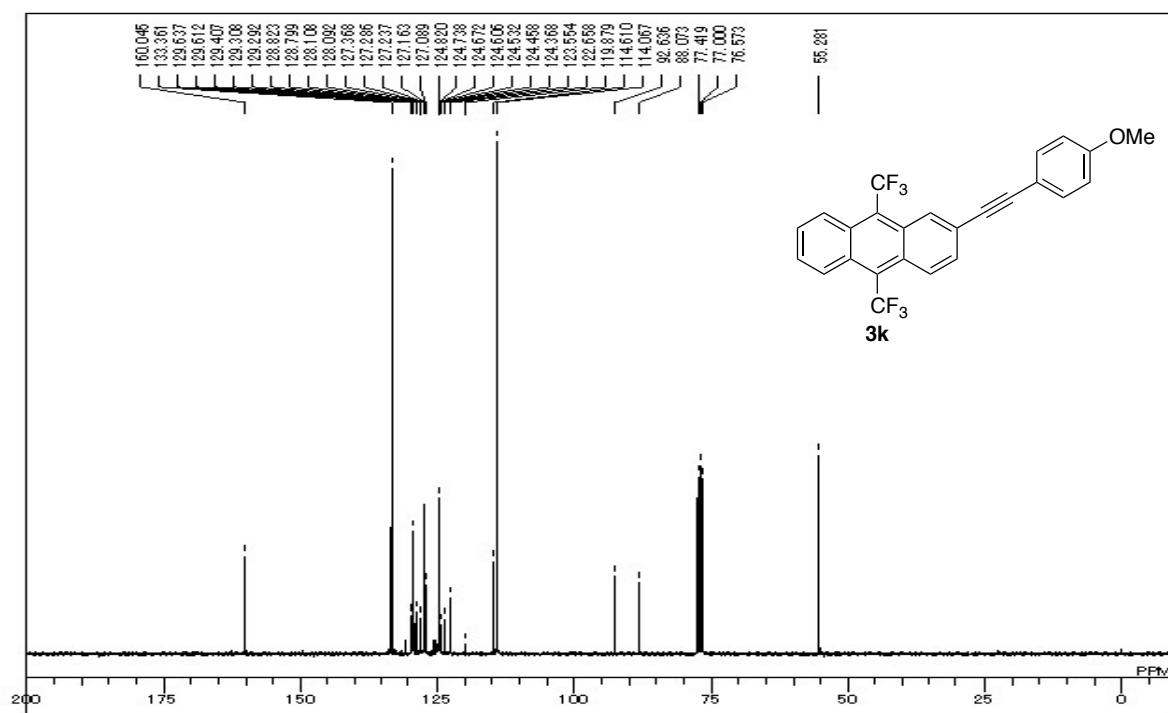

### $^1\text{H}$ NMR for **31**

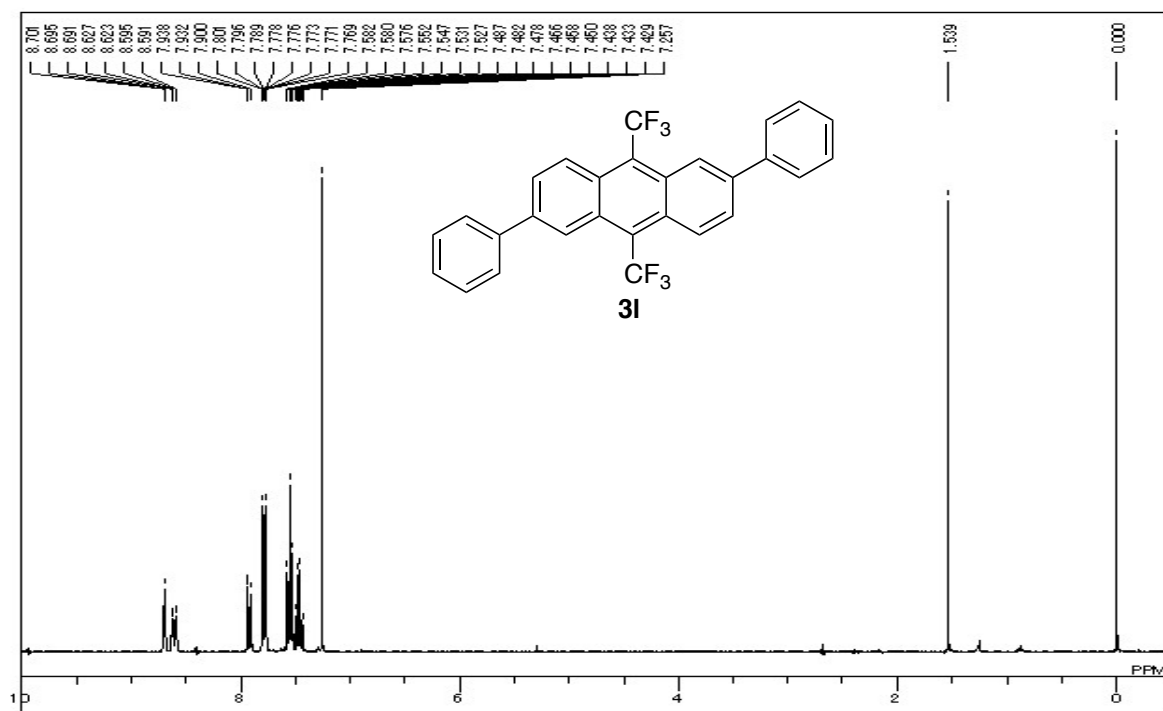

### $^{13}\text{C}$ NMR for **31**

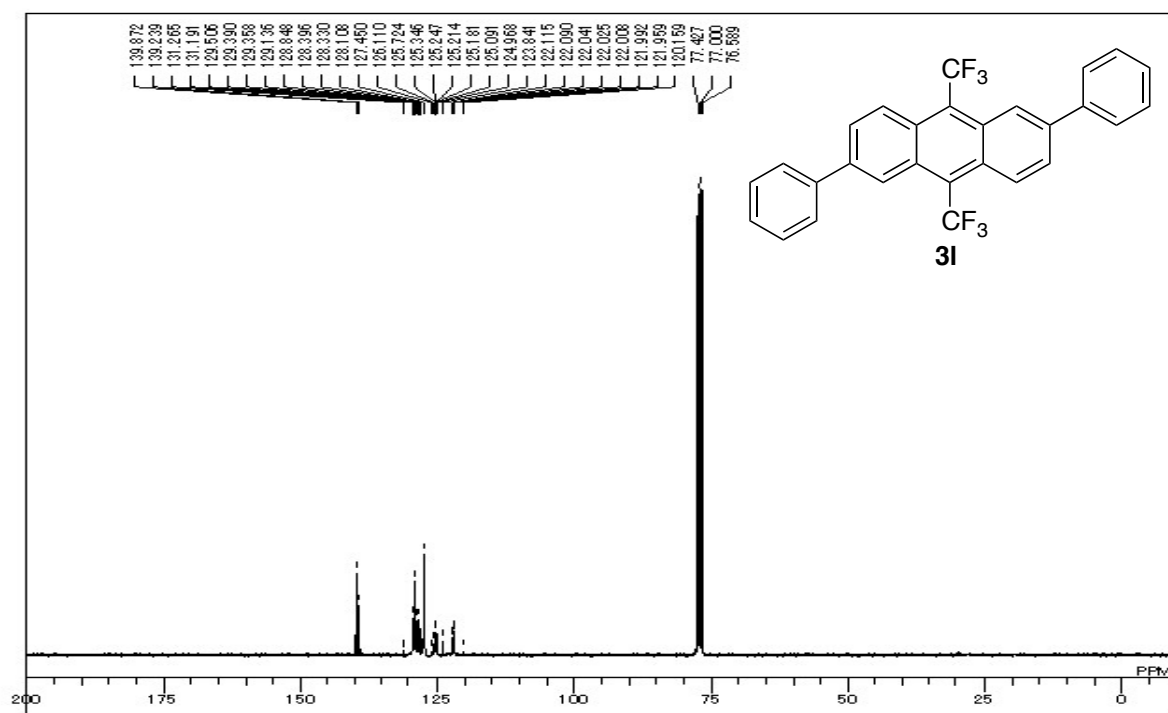

### $^1\text{H}$ NMR for **3m**

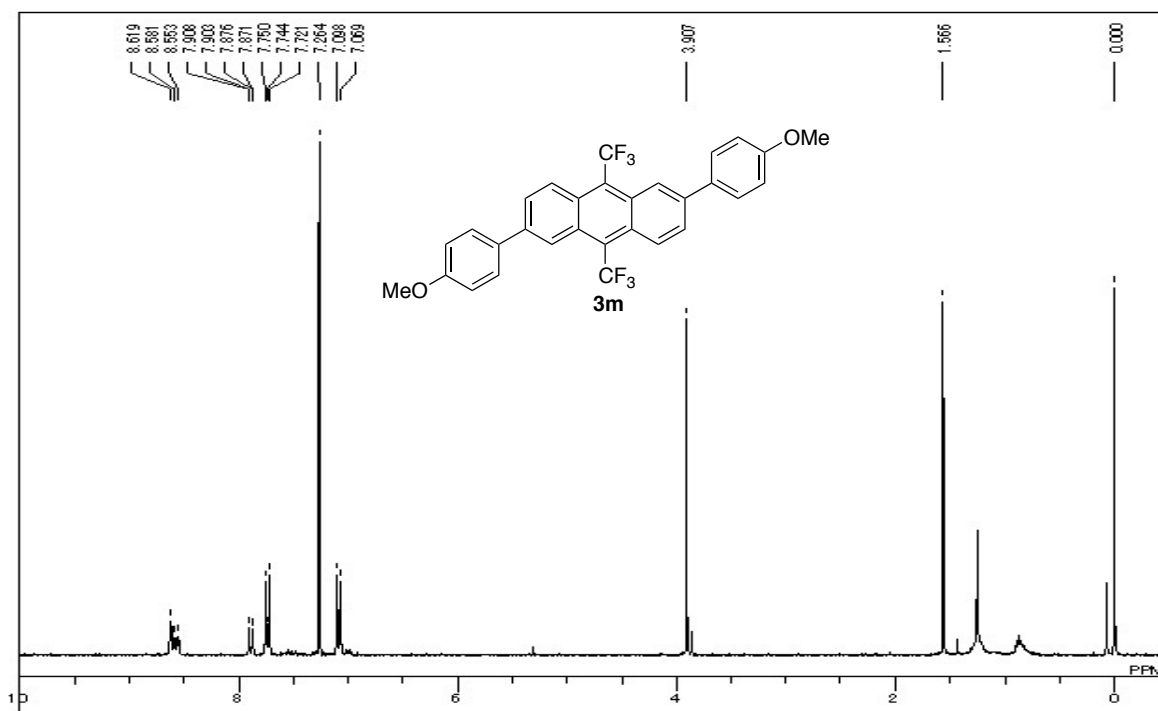

### $^{13}\text{C}$ NMR for **3m**

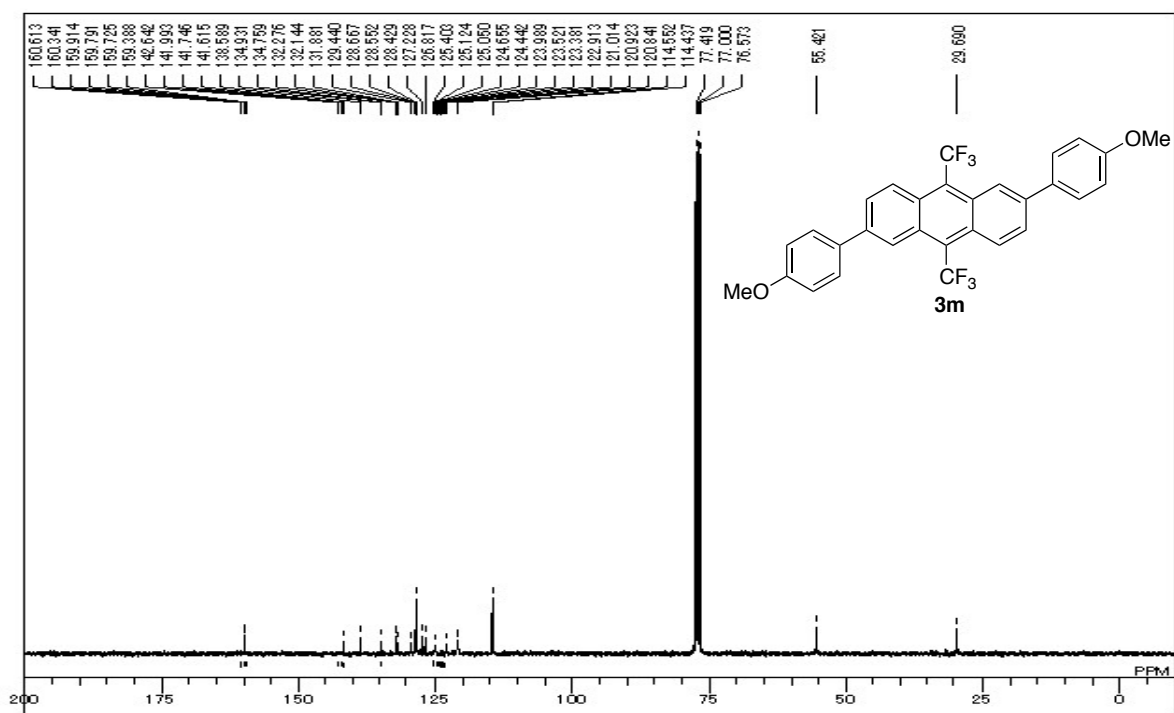

### $^1\text{H}$ NMR for **3n**

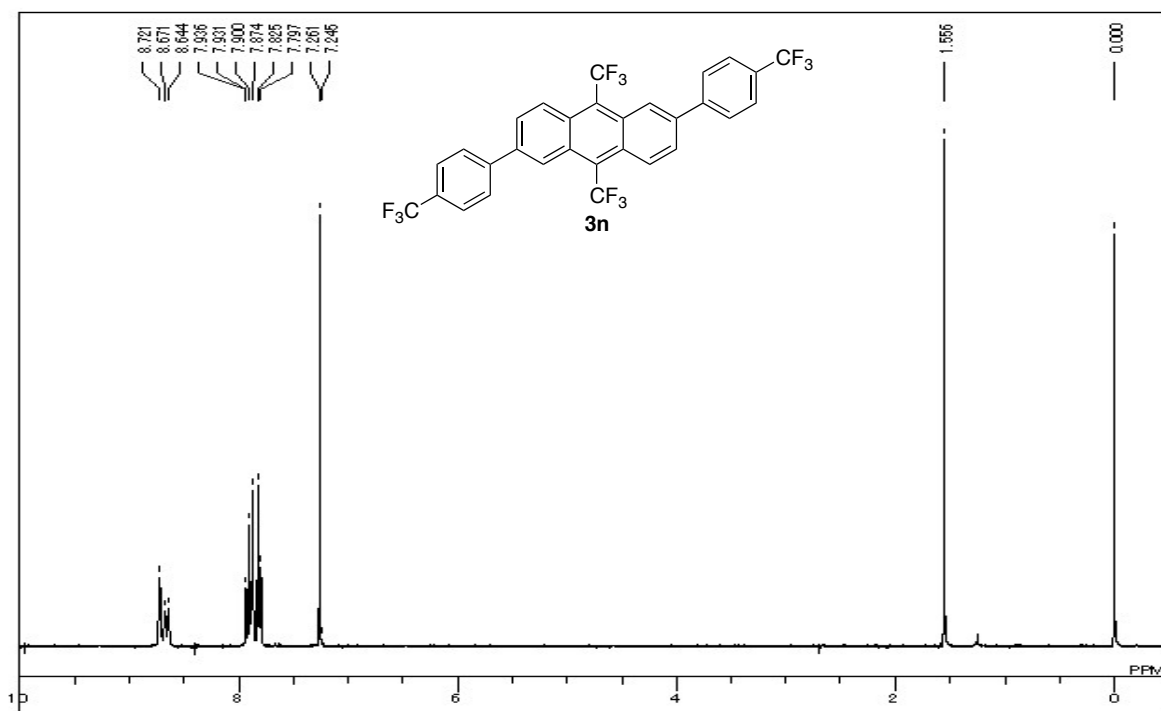

### $^{13}\text{C}$ NMR for **3n**

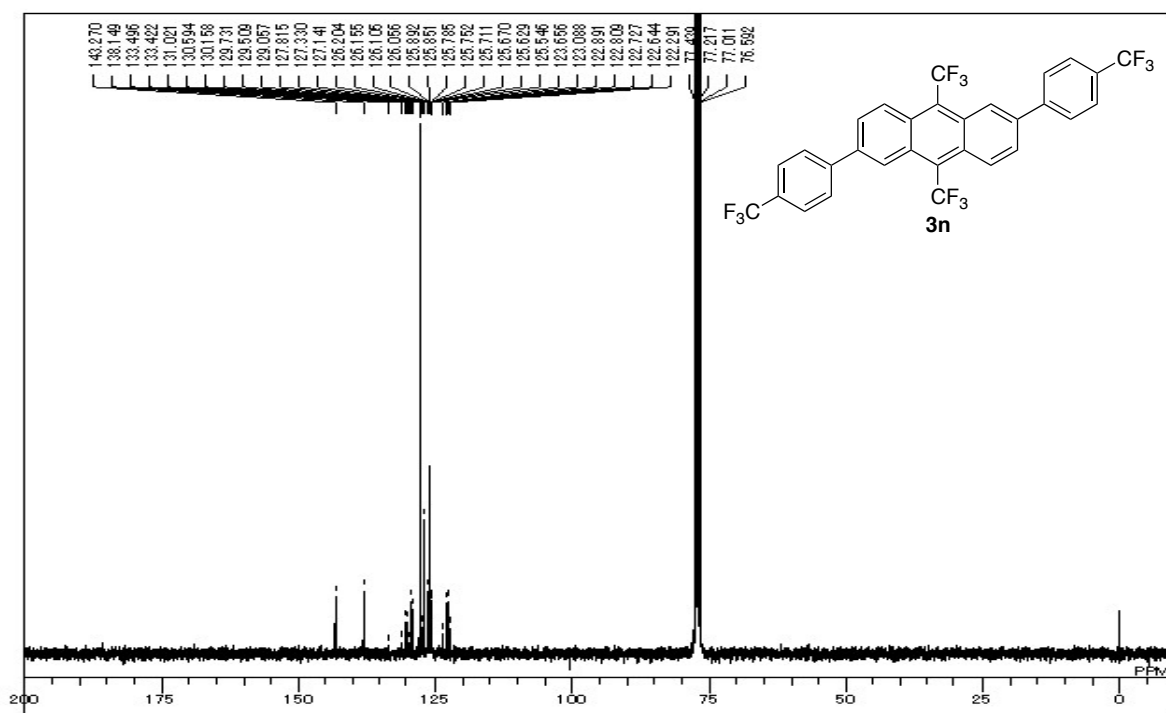

### $^1\text{H}$ NMR for **3o**

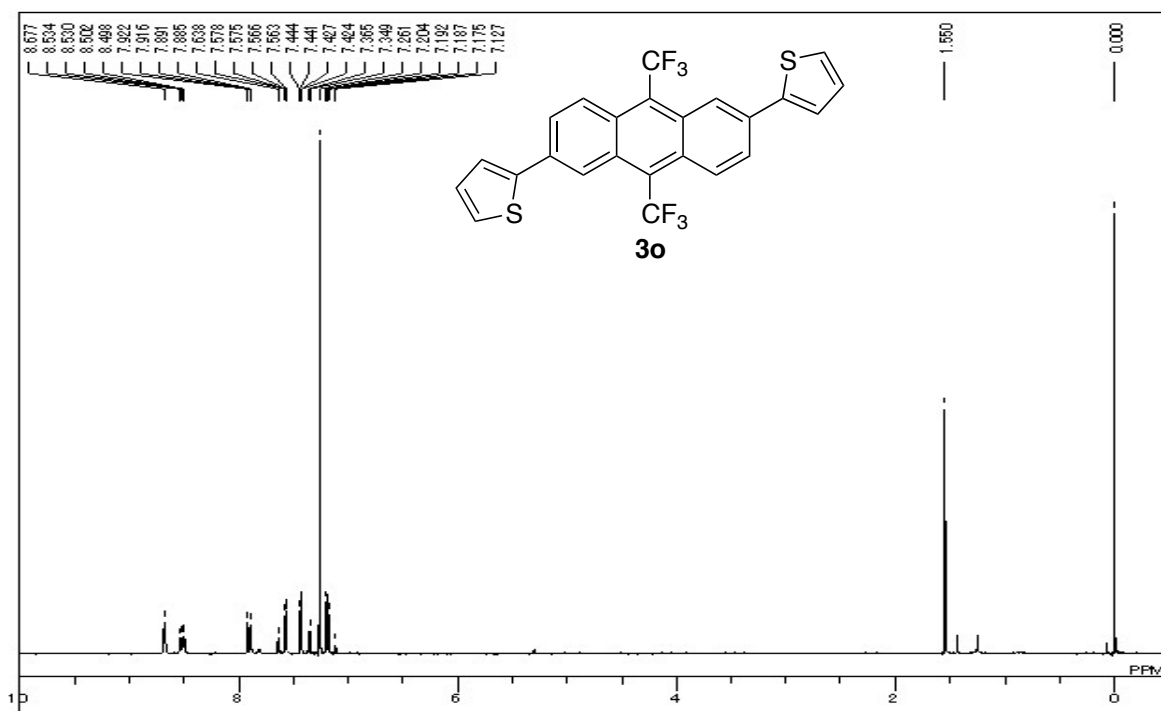

### $^{13}\text{C}$ NMR for **3o**

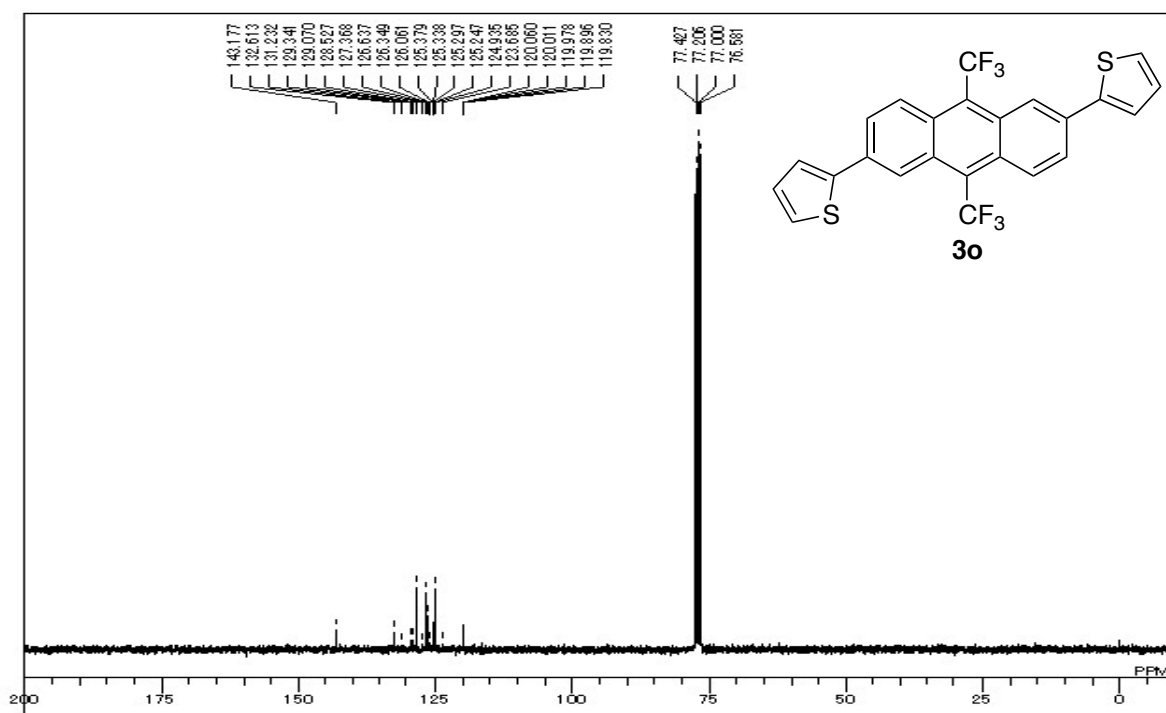

### $^1\text{H}$ NMR for **3p**

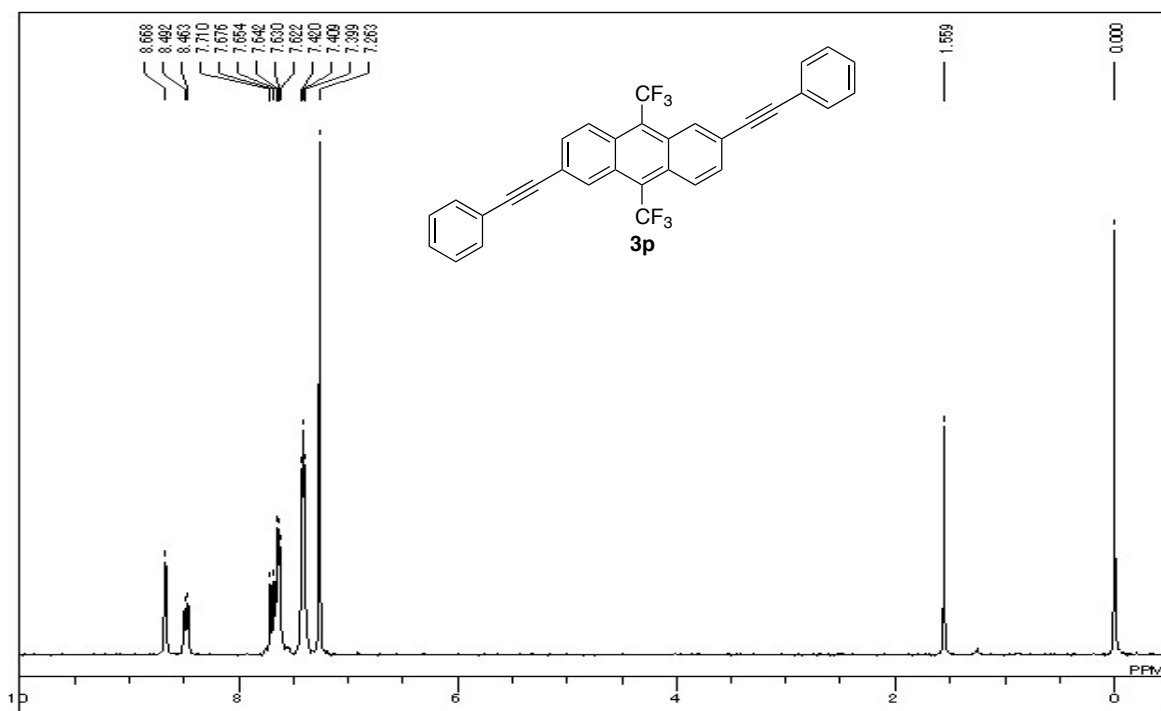

### $^{13}\text{C}$ NMR for **3p**

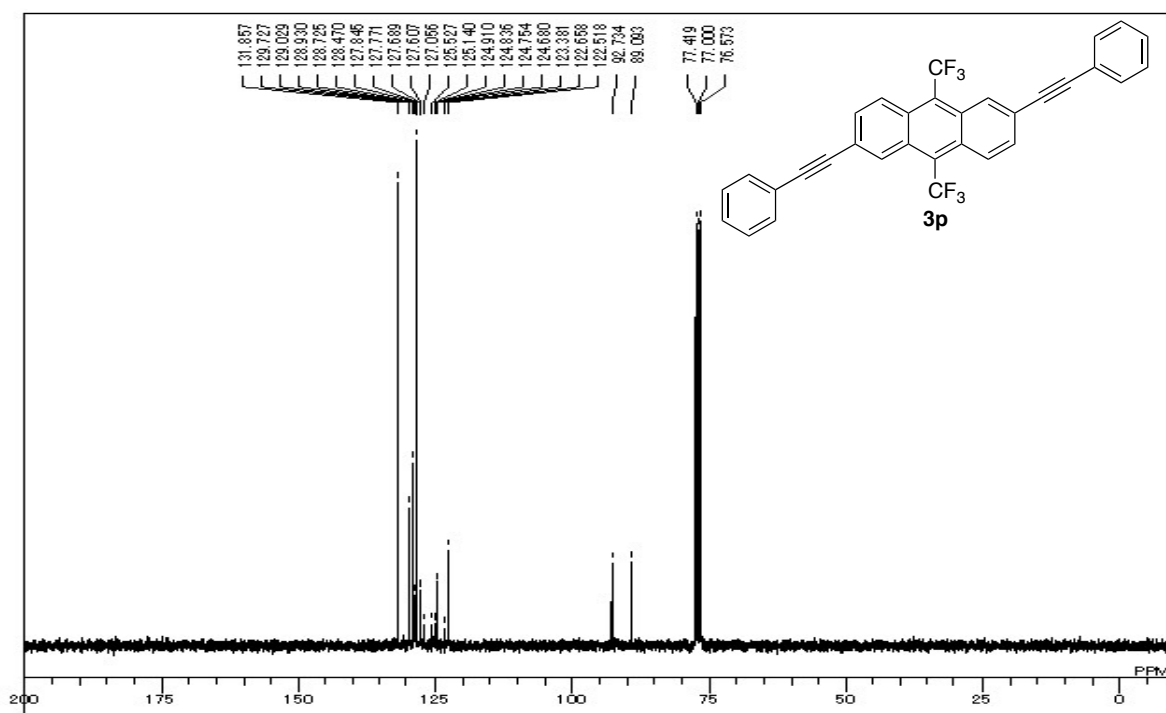

<sup>1</sup>H NMR for **3q**

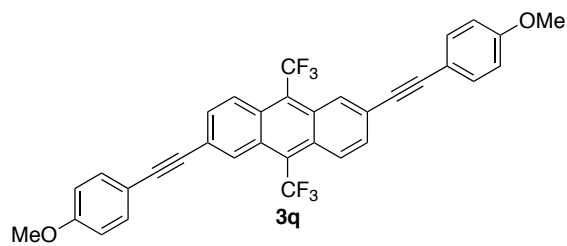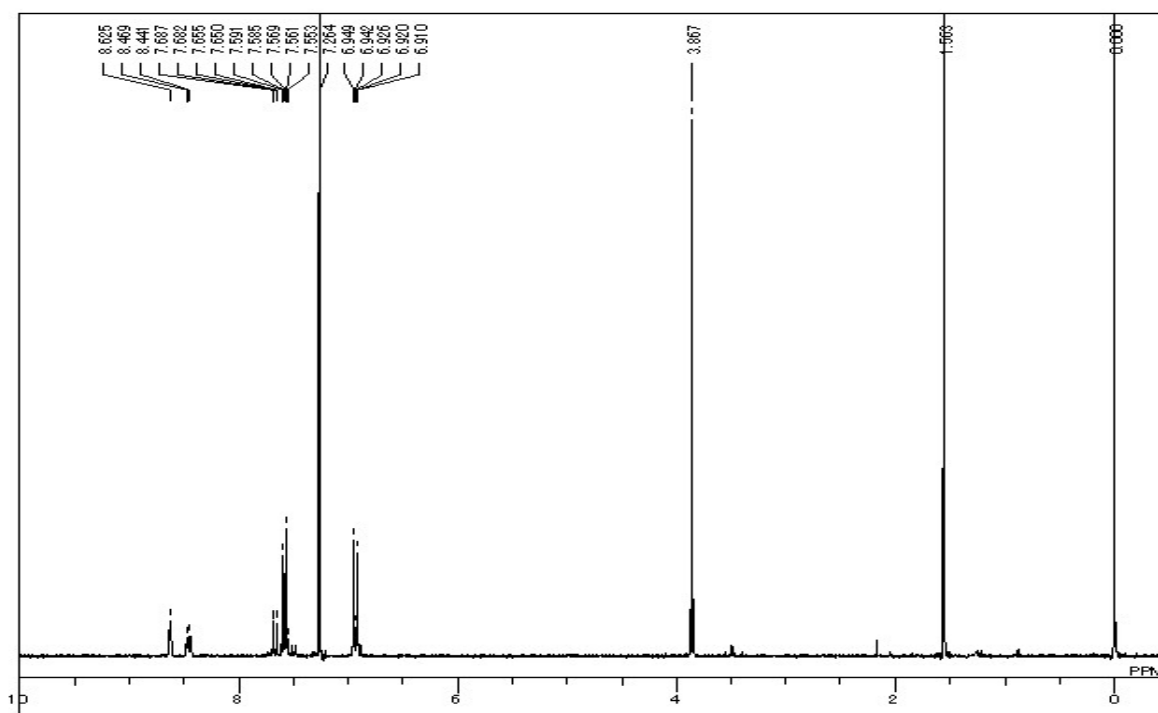

<sup>13</sup>C NMR for **3q** was not measured due to low solubility in any deuterated solvents.

### $^1\text{H}$ NMR for **4a**

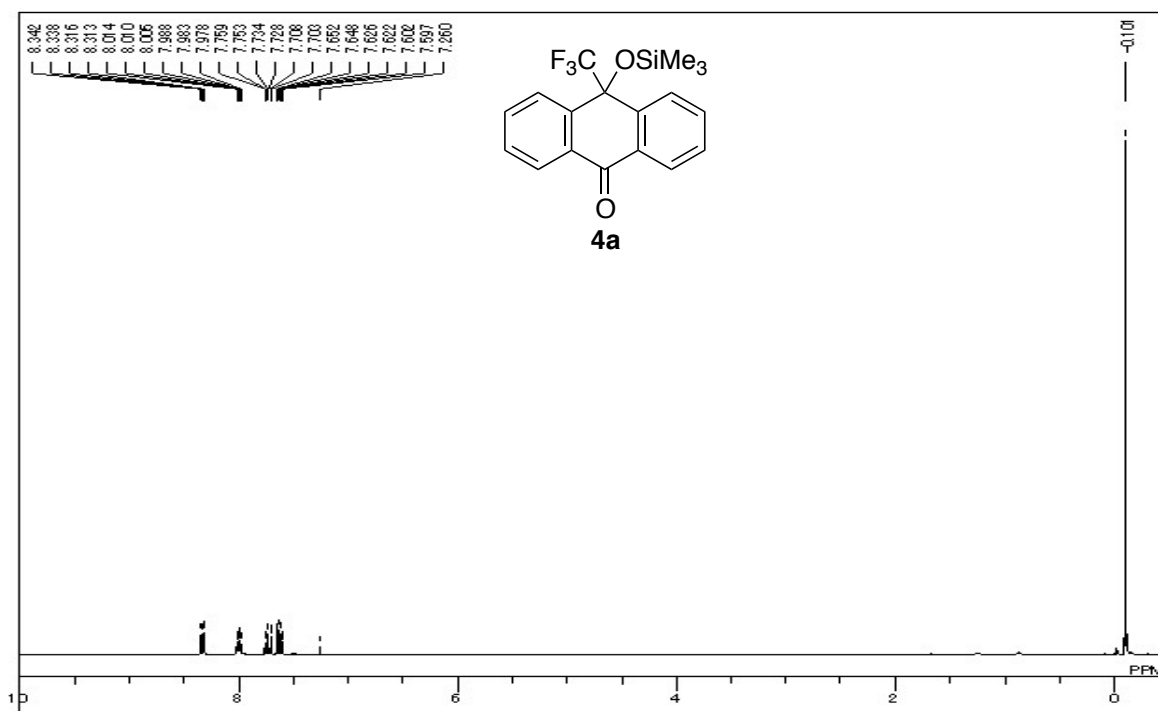

### $^{13}\text{C}$ NMR for **4a**

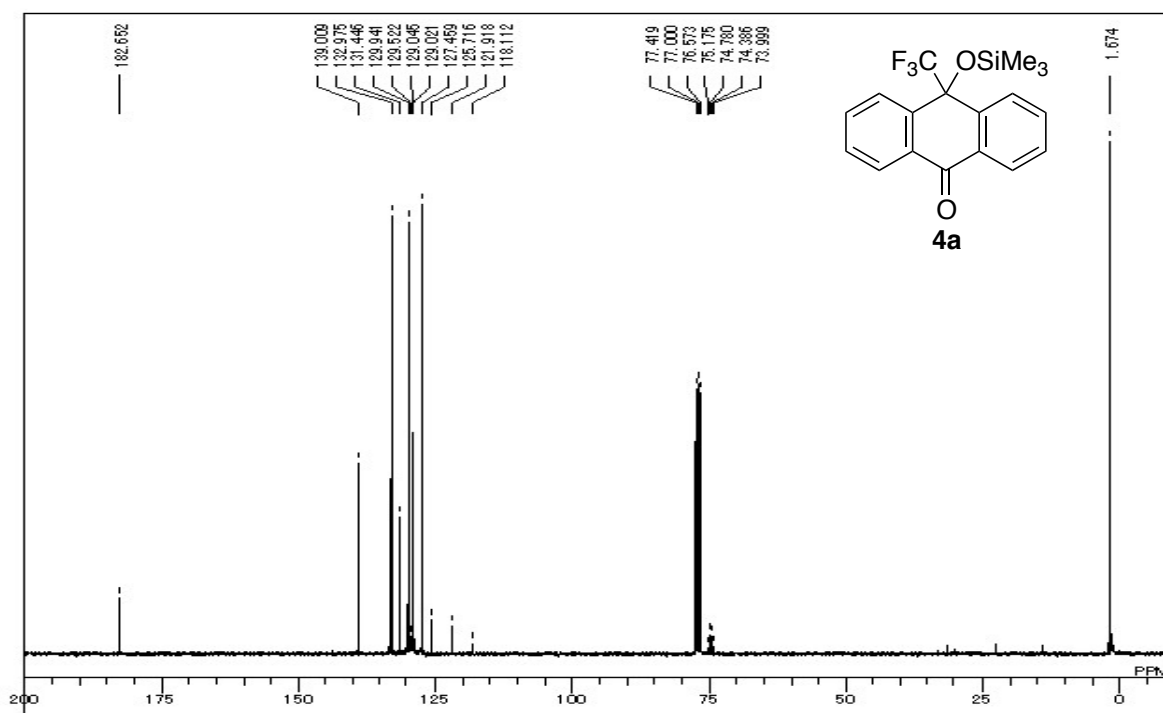



$^1\text{H}$  NMR for 9-(nonafluorobutyl)-10-(trifluoromethyl)-10-(trimethylsiloxy)anthracen-9-ol

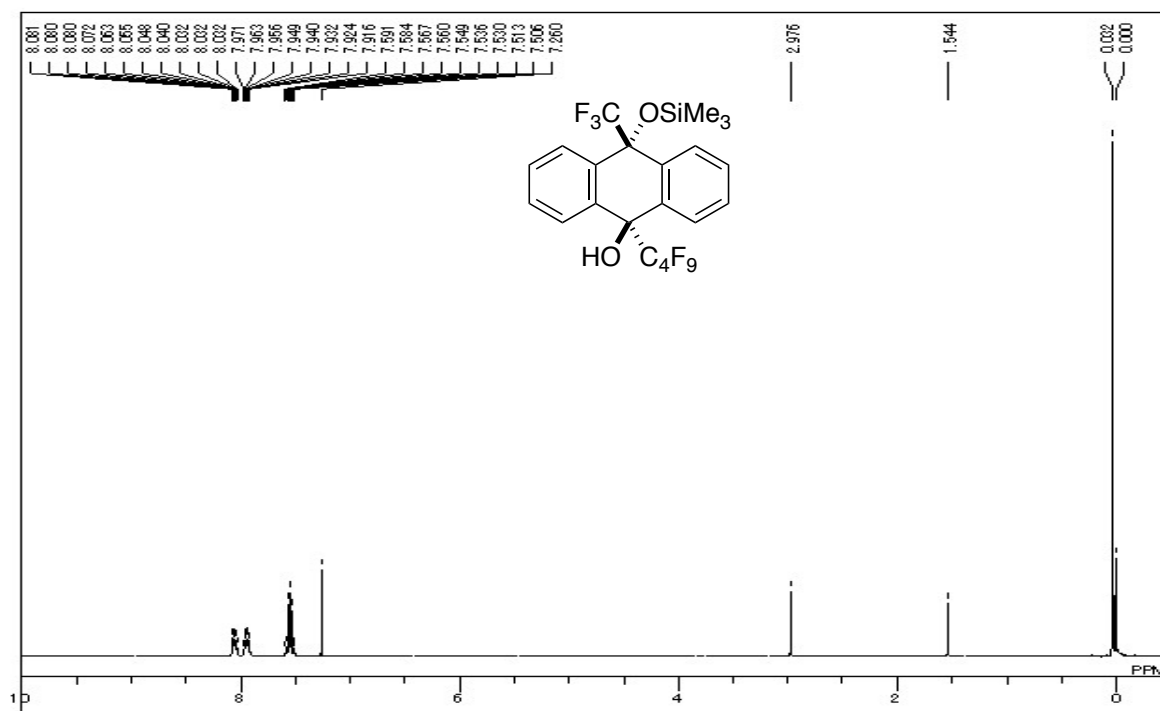

$^{13}\text{C}$  NMR for 9-(nonafluorobutyl)-10-(trifluoromethyl)-10-(trimethylsiloxy)anthracen-9-ol

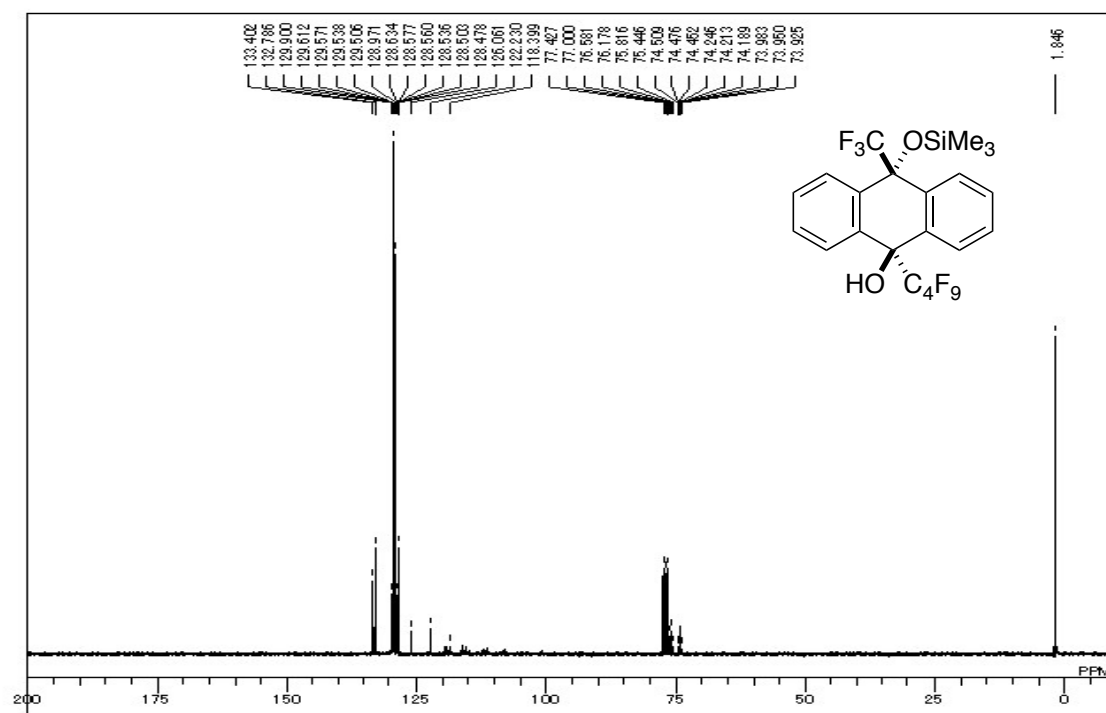

$^1\text{H}$  NMR for 9-(tridecafluorohexyl)-10-(trifluoromethyl)-10-(trimethylsiloxy)anthracen-9-ol

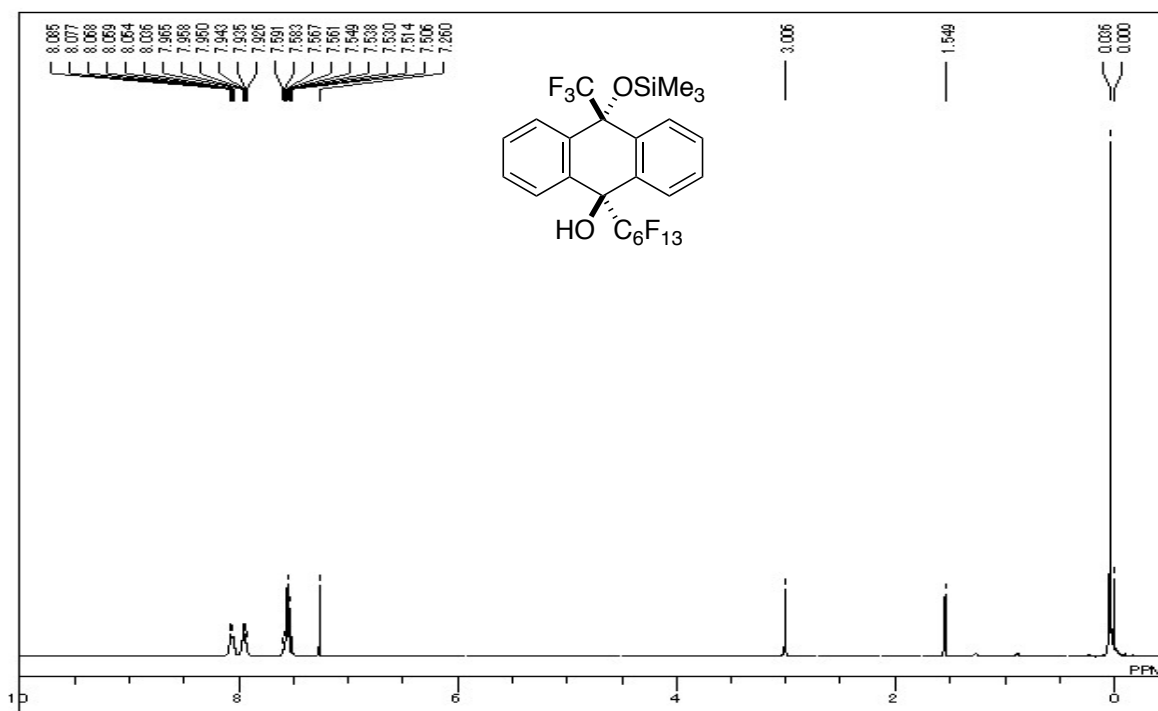

$^{13}\text{C}$  NMR for 9-(tridecafluorohexyl)-10-(trifluoromethyl)-10-(trimethylsiloxy)anthracen-9-ol

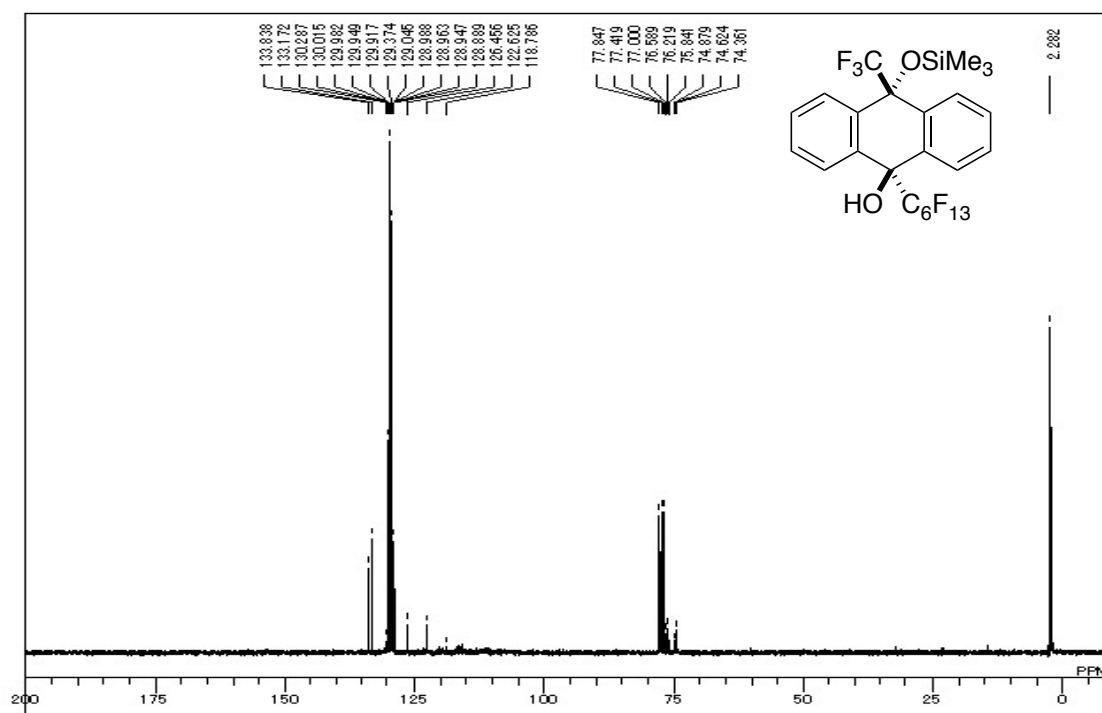

$^1\text{H}$  NMR for 9-(heptafluorooctyl)-10-(trifluoromethyl)-10-(trimethylsiloxy)anthracen-9-ol

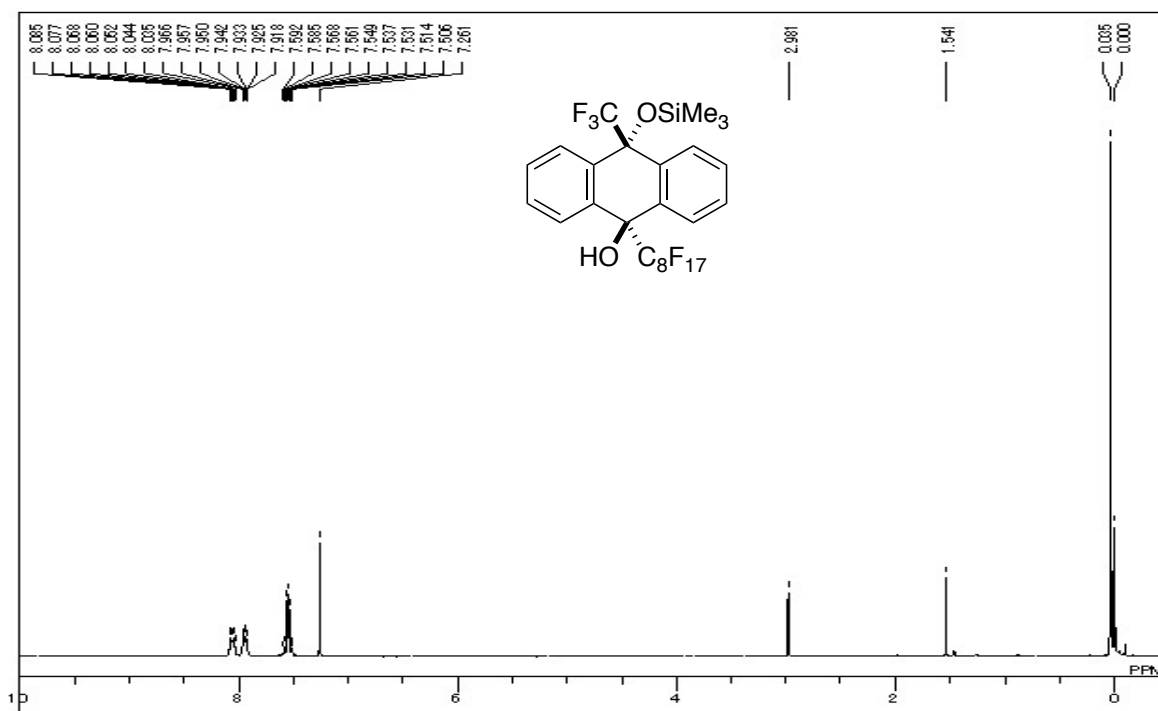

$^{13}\text{C}$  NMR for 9-(heptafluorooctyl)-10-(trifluoromethyl)-10-(trimethylsiloxy)anthracen-9-ol

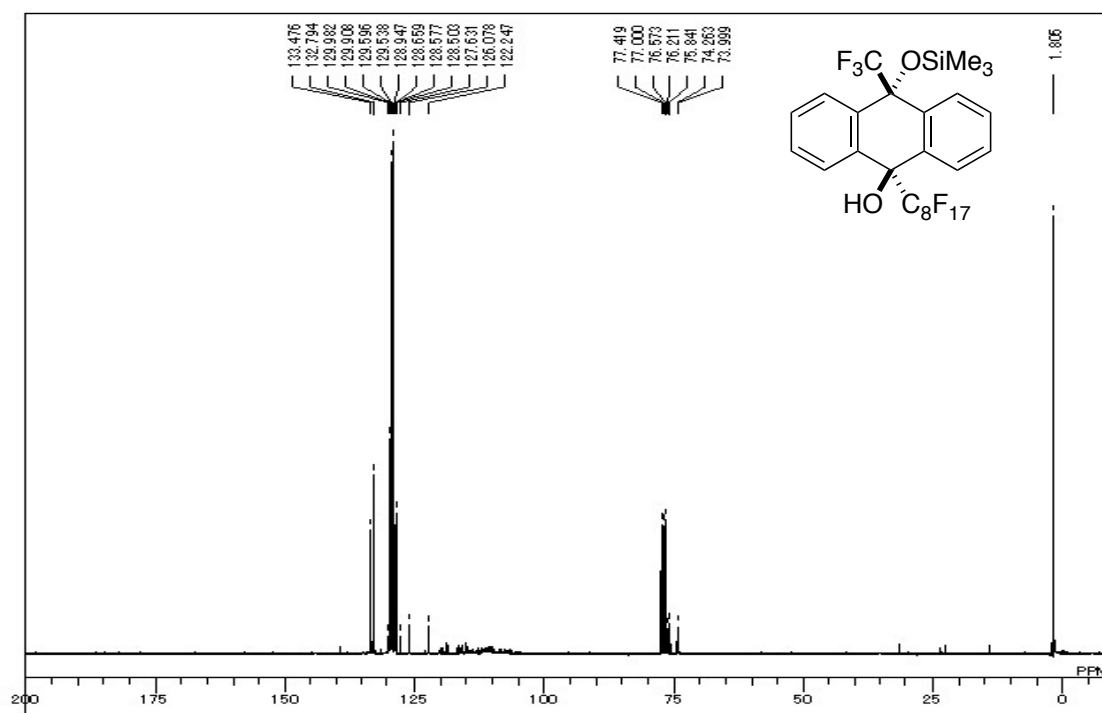

$^1\text{H}$  NMR for 9-(hencosafluorodecyl)-10-(trifluoromethyl)-10-(trimethylsiloxy)anthracen-9-ol

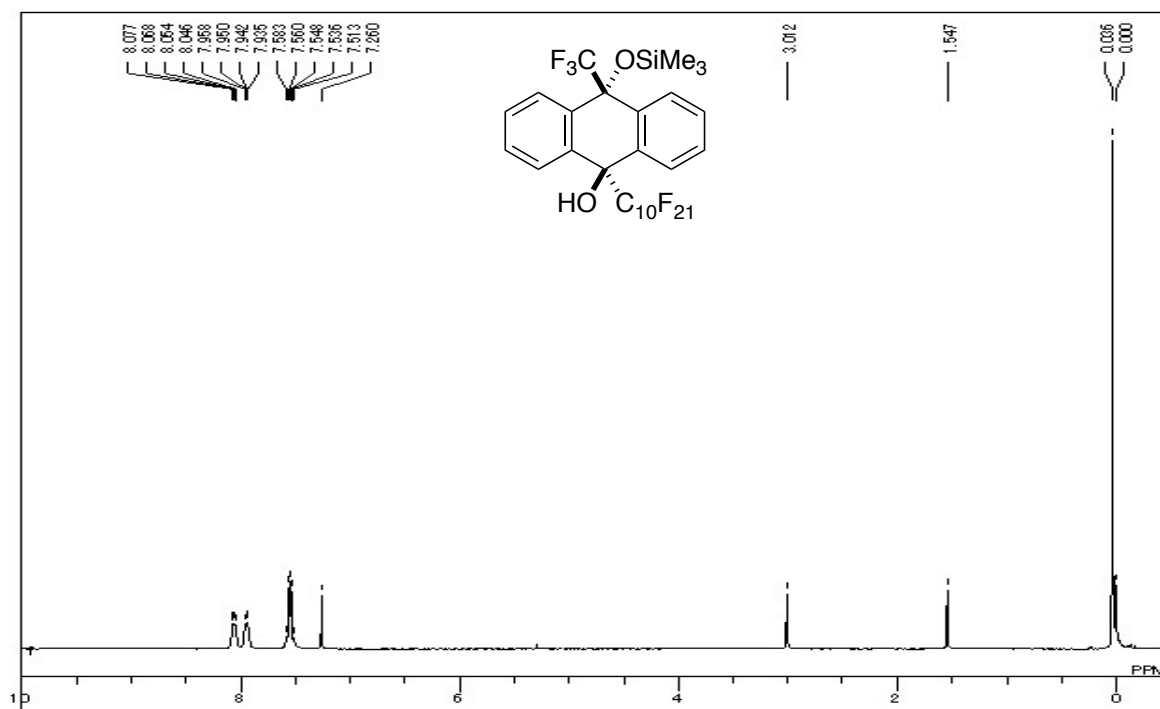

$^{13}\text{C}$  NMR for 9-(hencosafluorodecyl)-10-(trifluoromethyl)-10-(trimethylsiloxy)anthracen-9-ol

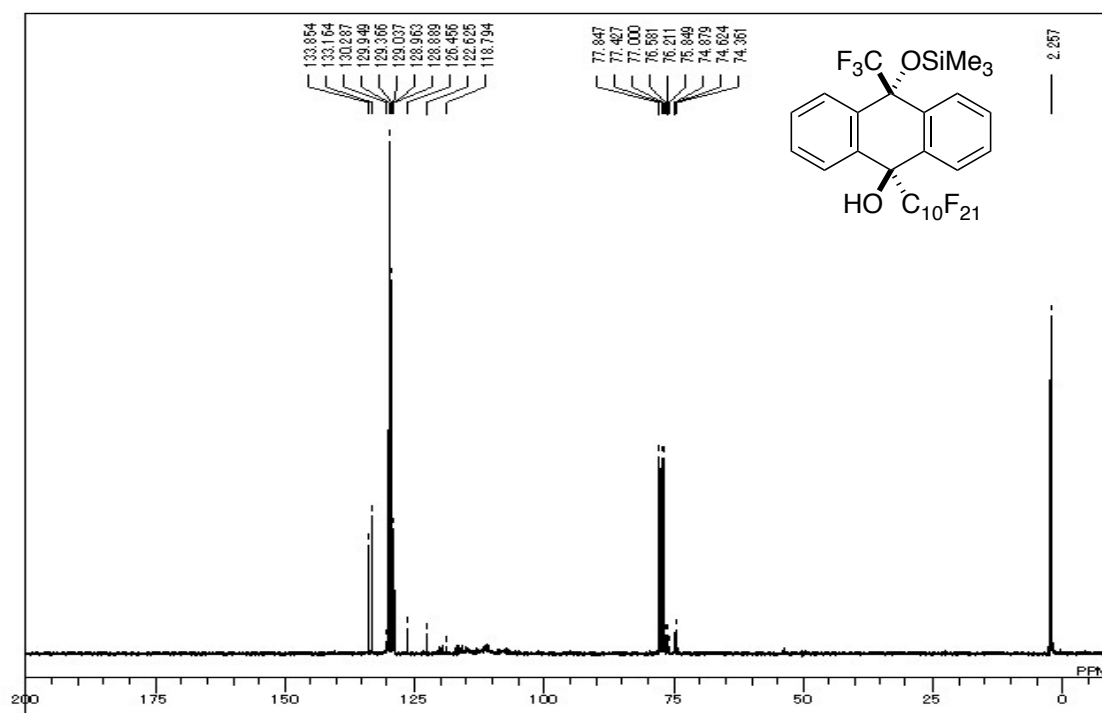

### $^1\text{H}$ NMR for **5aA**

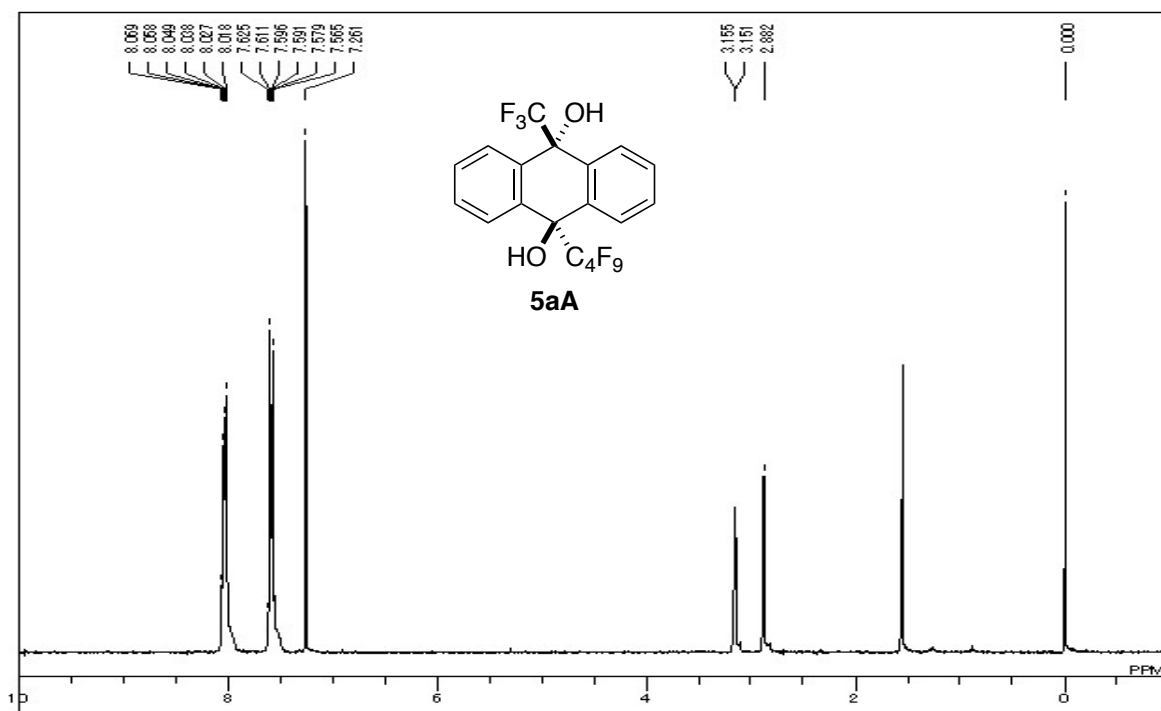

### $^{13}\text{C}$ NMR for **5aA**

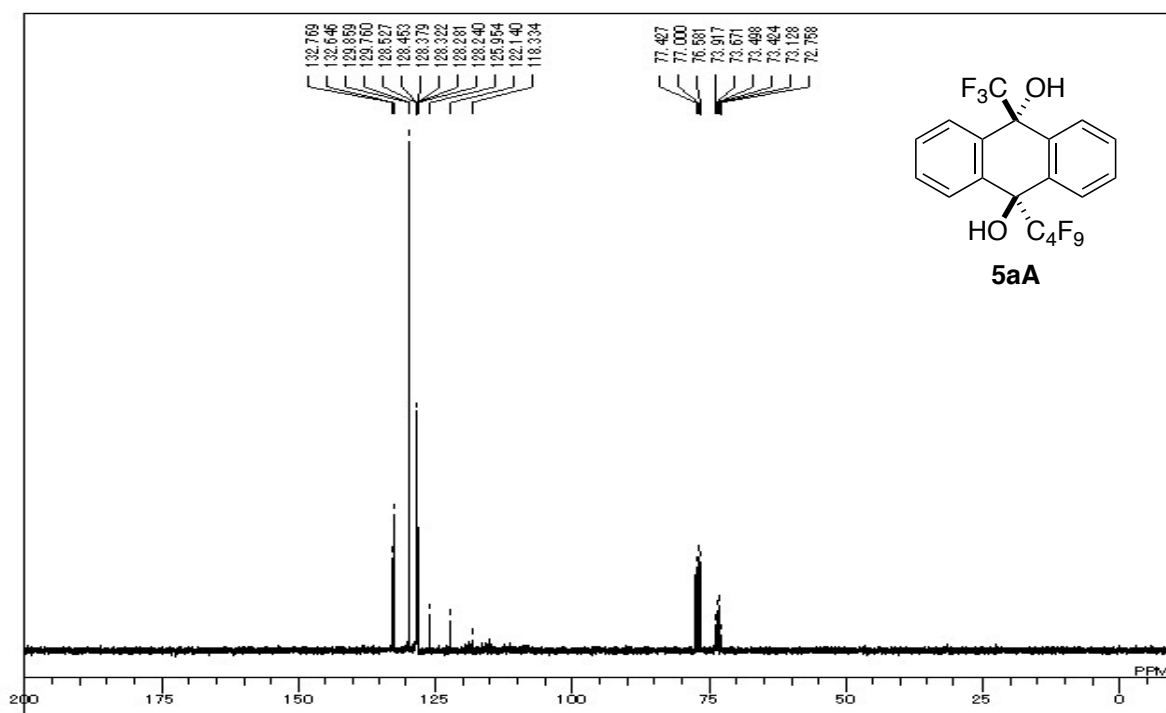

### $^1\text{H}$ NMR for **5aB**

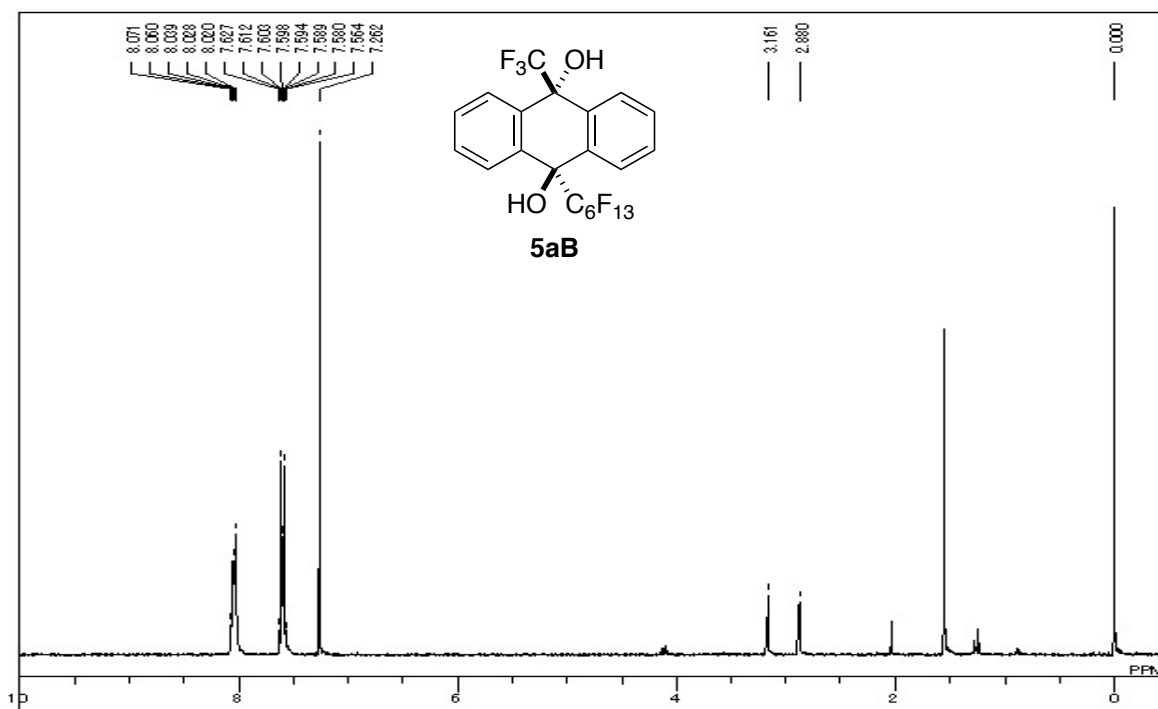

### $^{13}\text{C}$ NMR for **5aB**

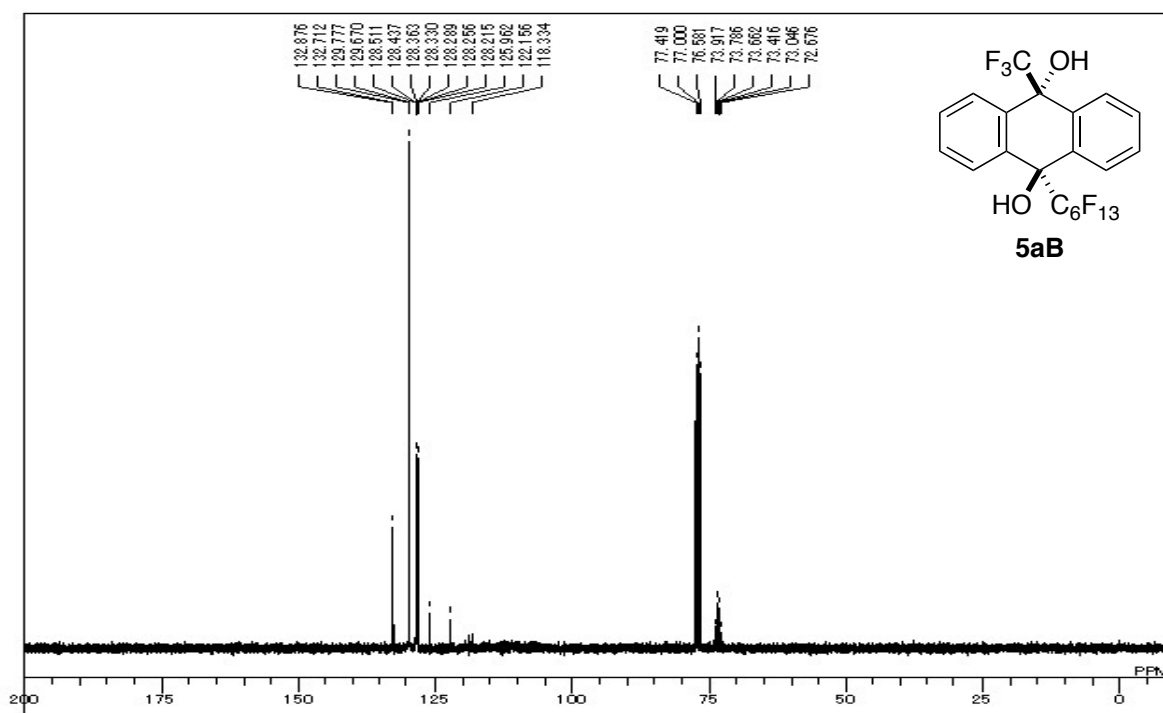

### $^1\text{H}$ NMR for **5aC**

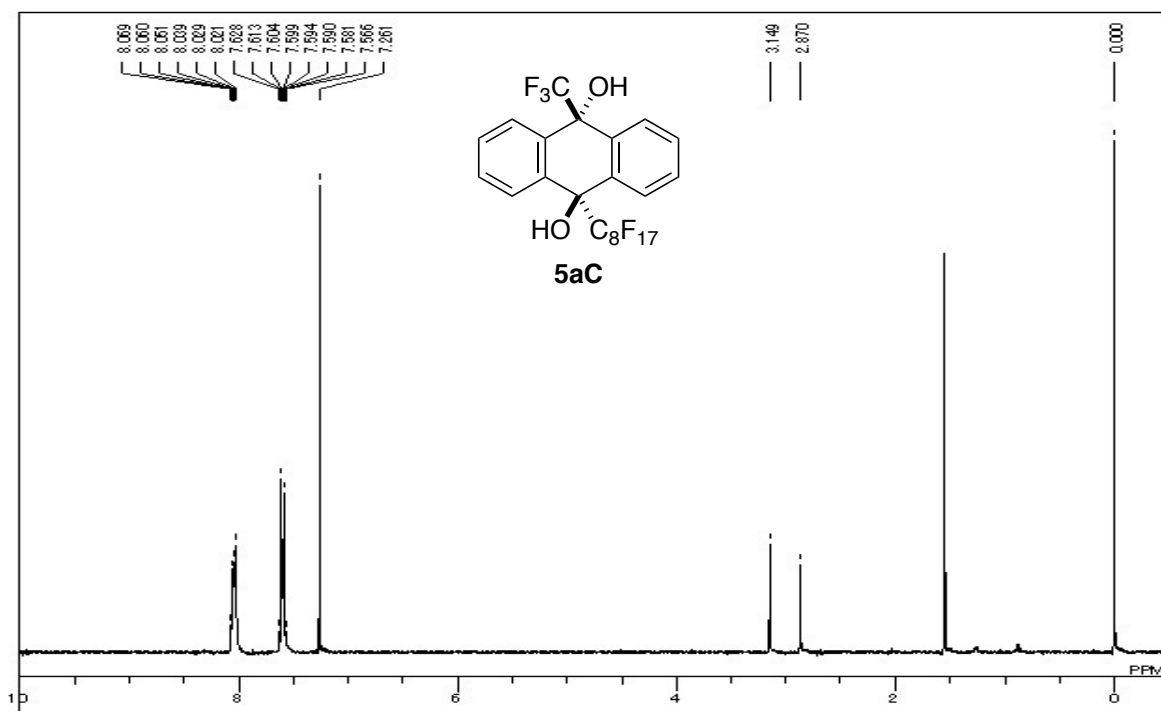

### $^{13}\text{C}$ NMR for **5aC**

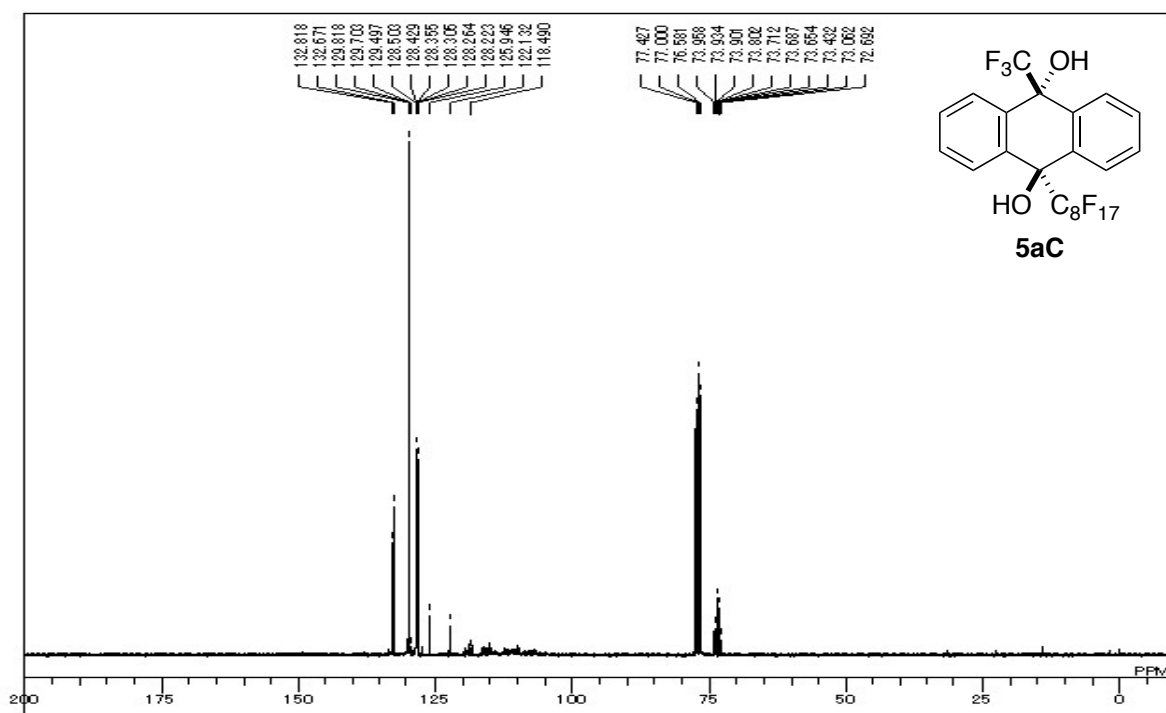

### $^1\text{H}$ NMR for **5aD**

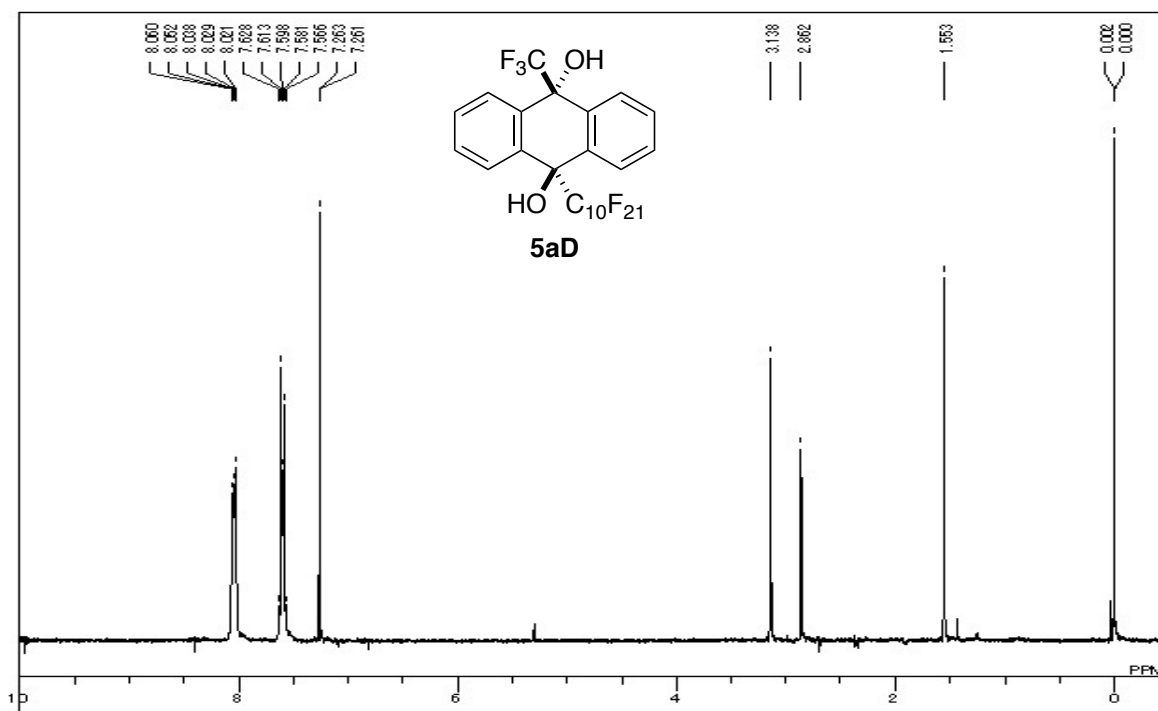

### $^{13}\text{C}$ NMR for **5aD**

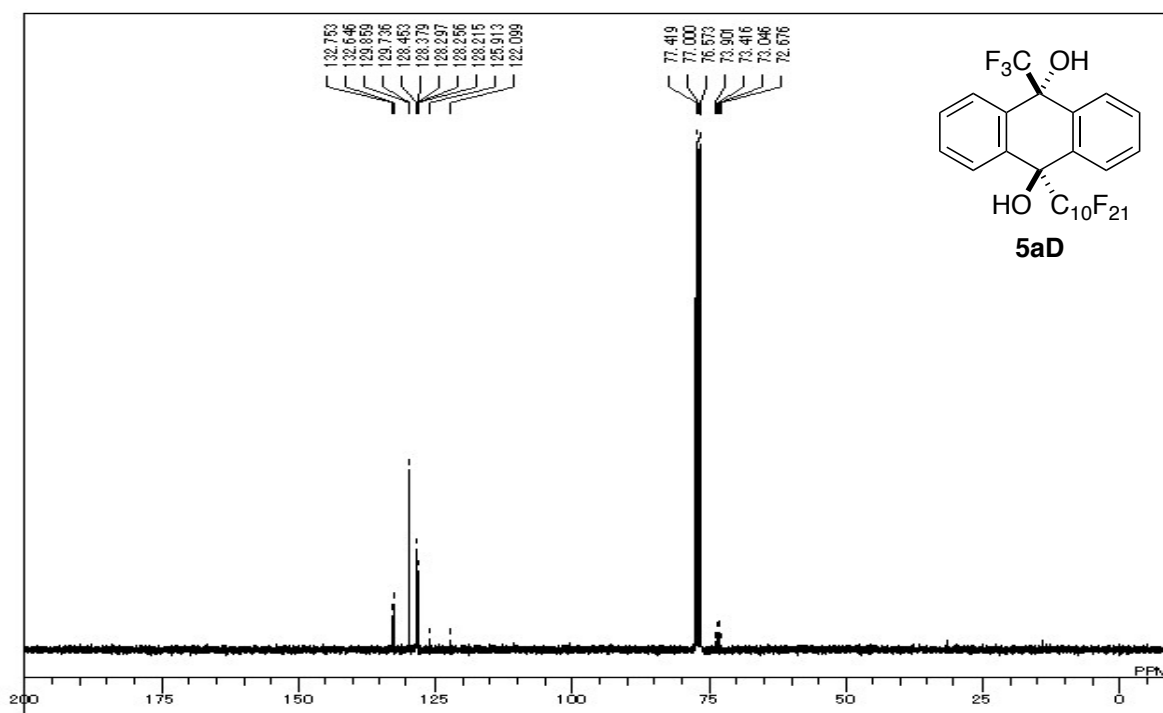



### $^1\text{H}$ NMR for **6aA**

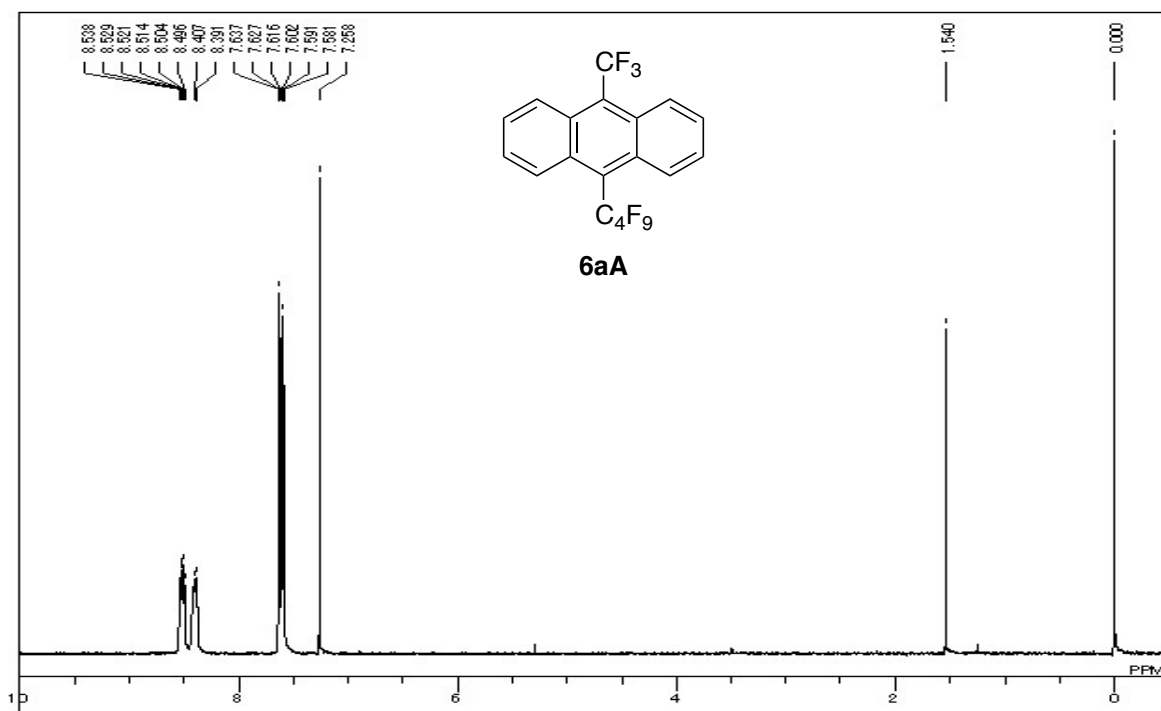

### $^{13}\text{C}$ NMR for **6aA**

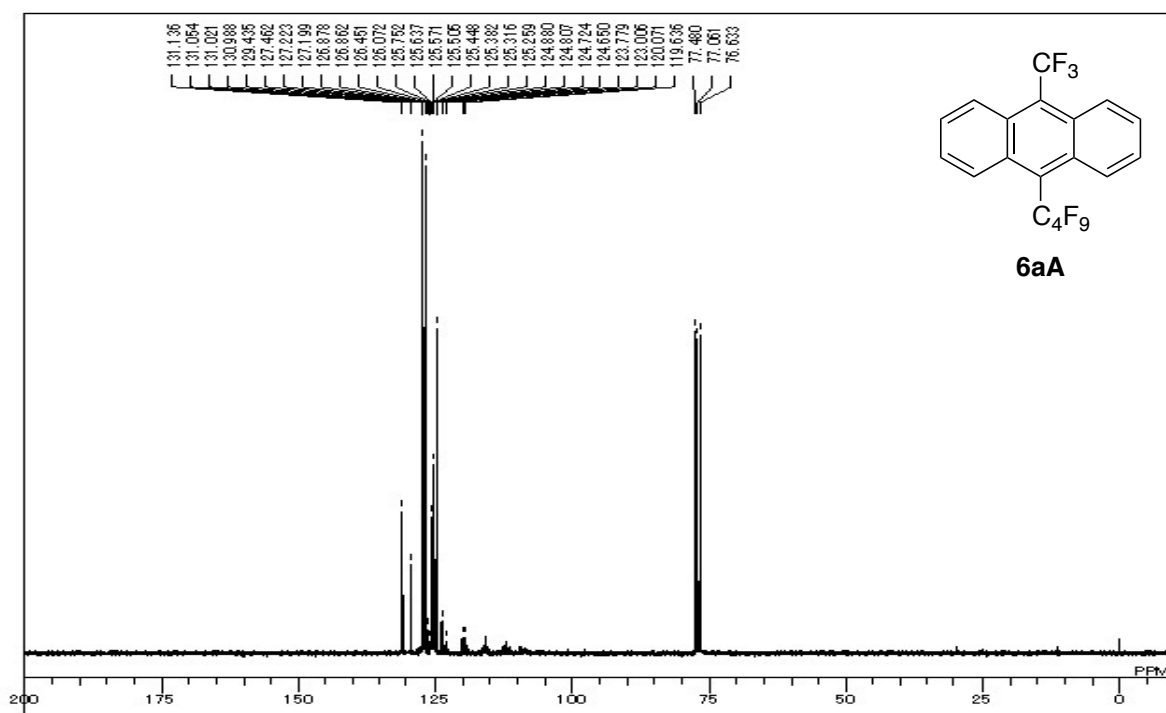

### $^1\text{H}$ NMR for **6aB**

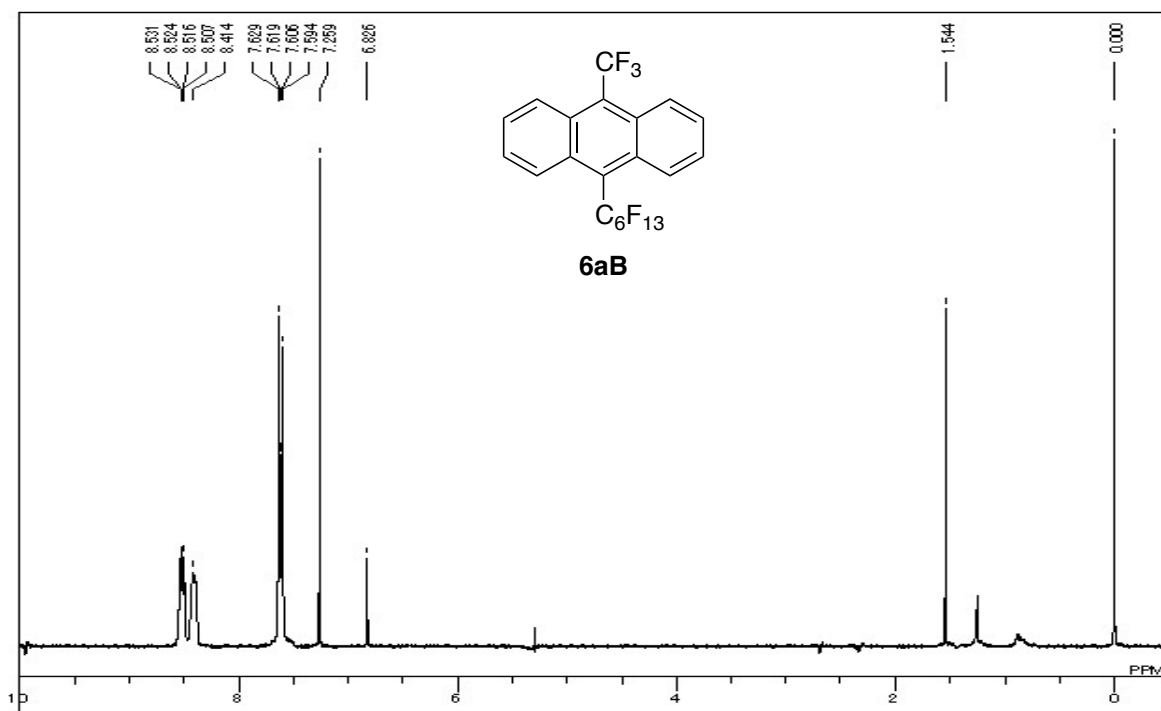

### $^{13}\text{C}$ NMR for **6aB**

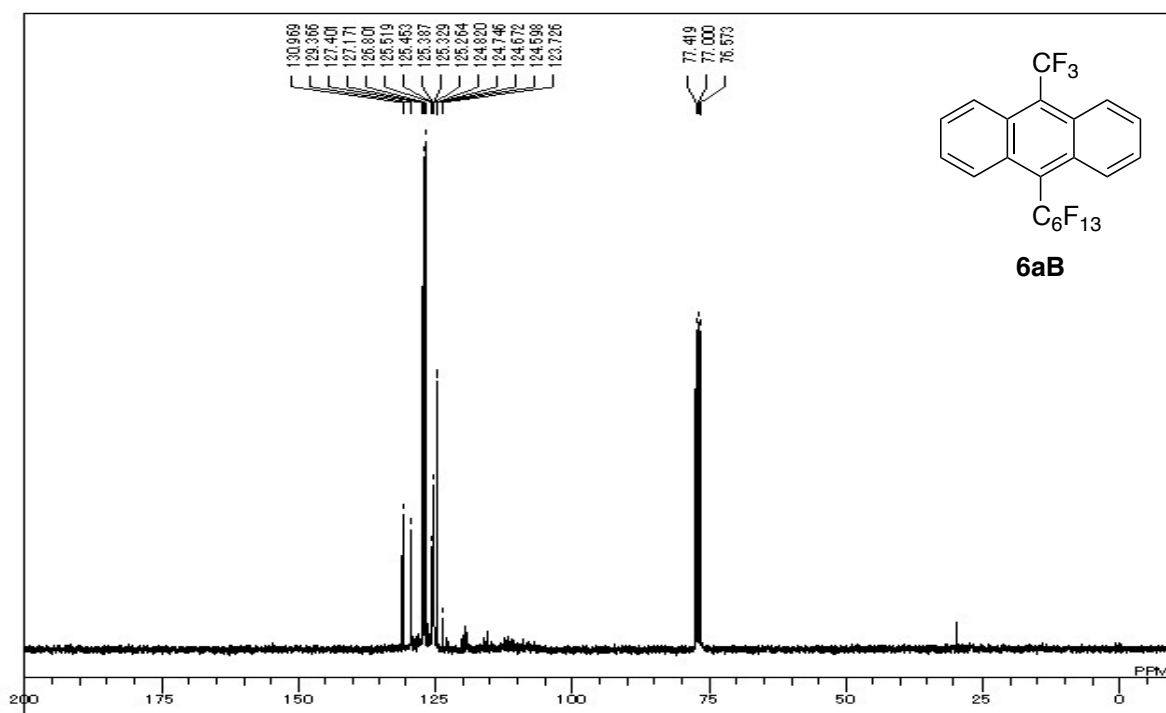

### $^1\text{H}$ NMR for **6aC**

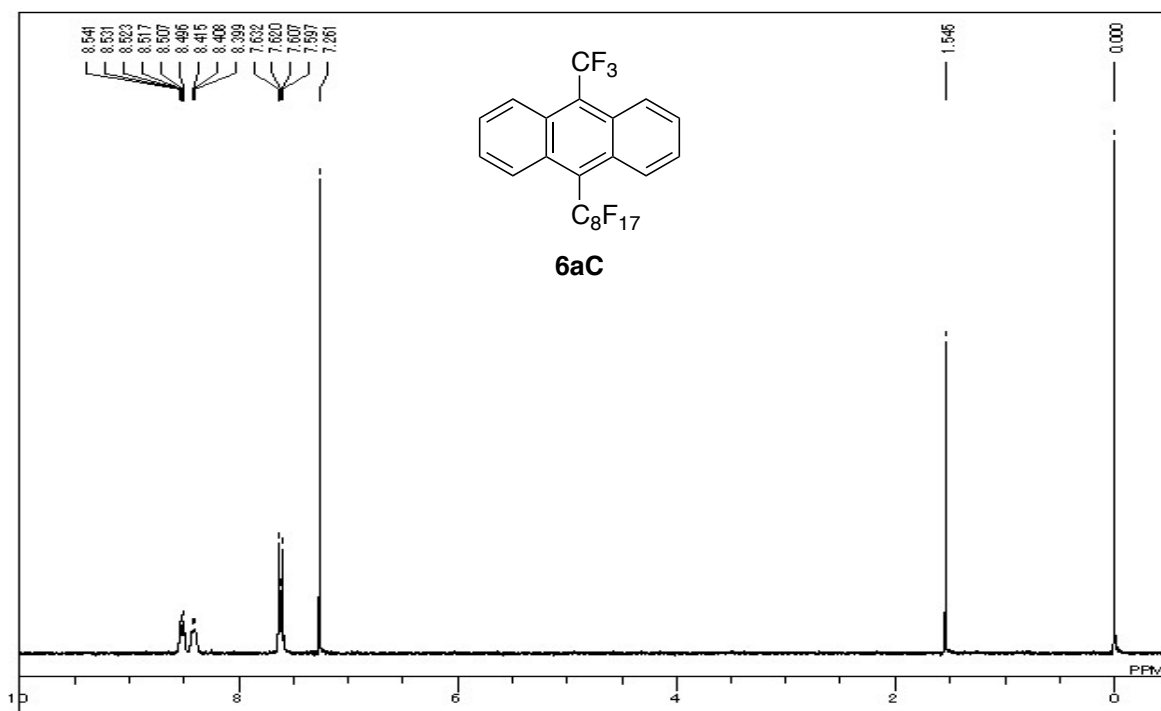

### $^{13}\text{C}$ NMR for **6aC**

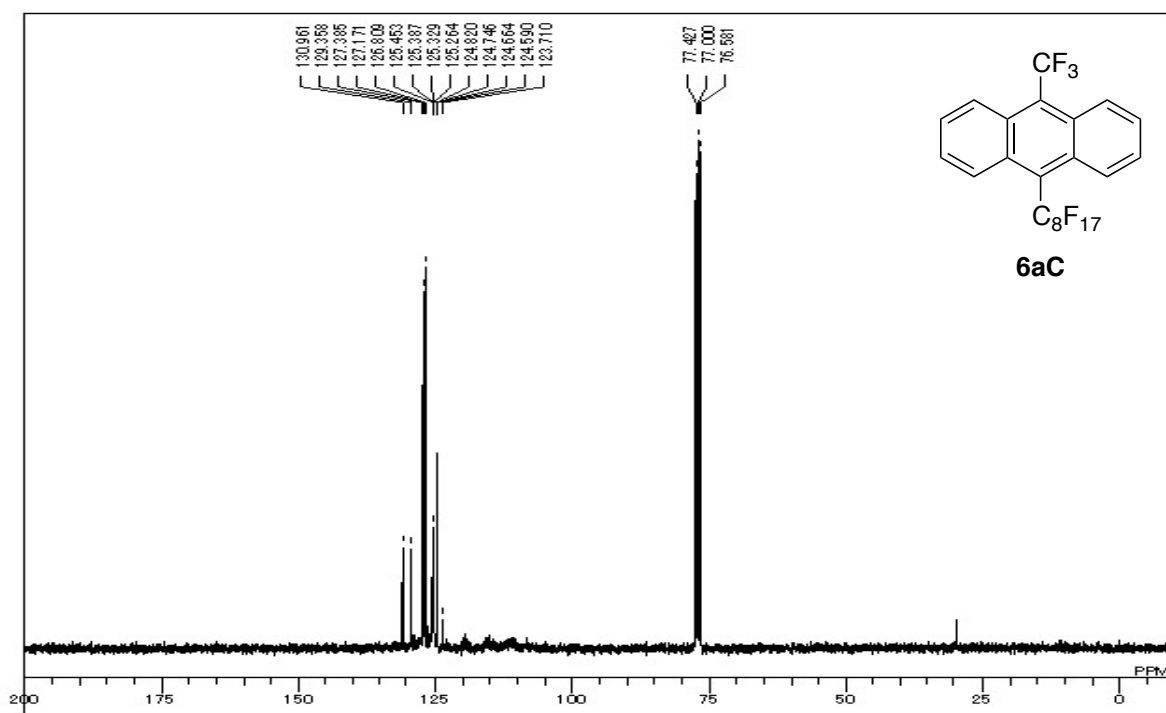

### $^1\text{H}$ NMR for **6aD**

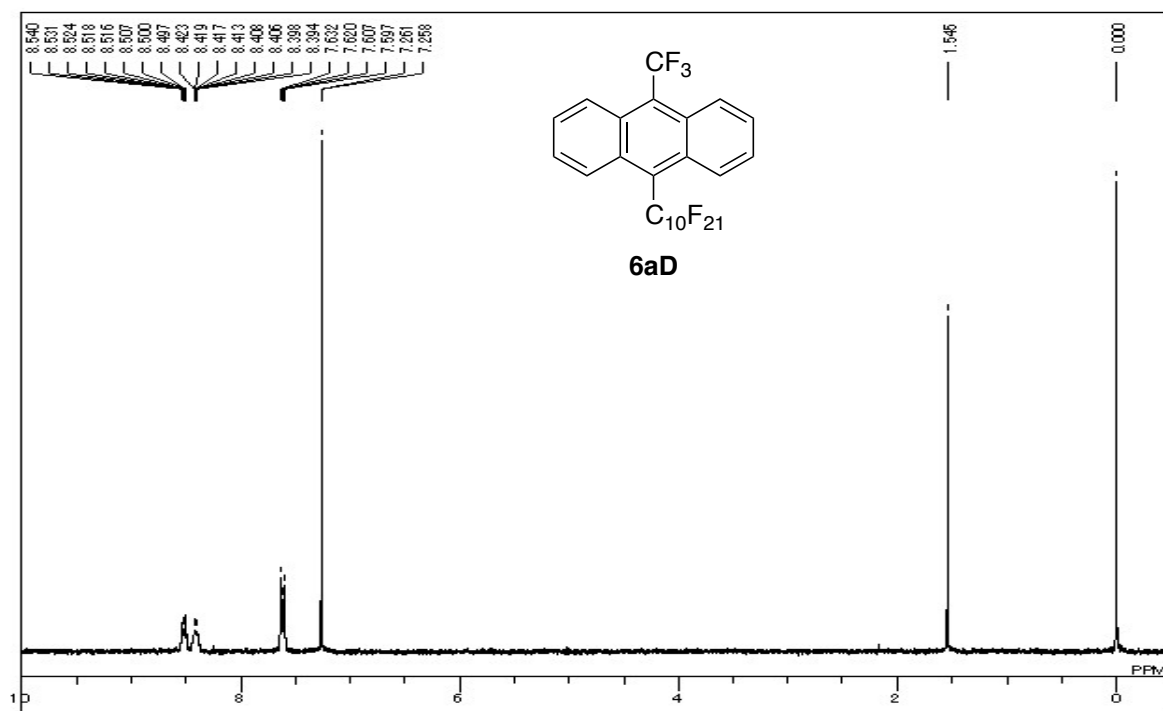

### $^{13}\text{C}$ NMR for **6aD**

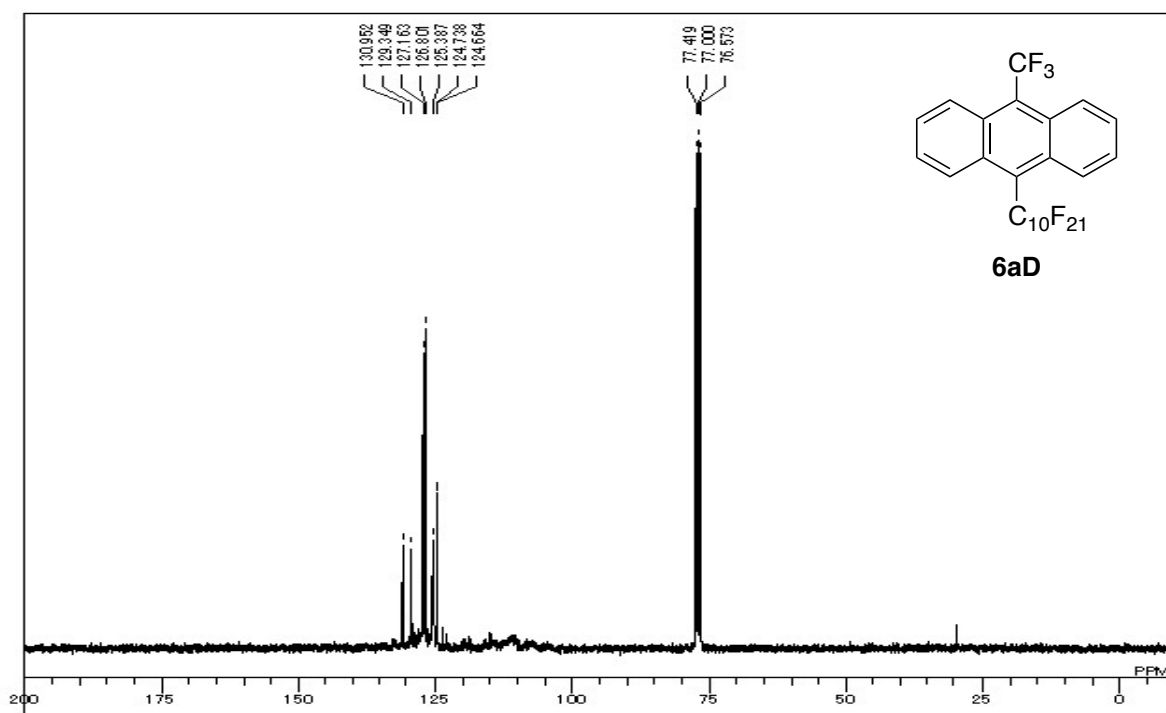

Supplement: c3ra40974k_2.pdf [file c3ra40974k_2.pdf]
