# Supplementary material for: Development of novel synthetic routes to bis(perfluoroalkyl)-substituted anthracene derivatives
Source: Royal Society of Chemistry journal article supplement (doi:10.1039/c3ra40974k), 2013-01-01
Supplement: c3ra40974k.pdf [file c3ra40974k.pdf]

# *Supplementary Information*

## Development of novel synthetic routes to bis(perfluoroalkyl)-substituted anthracene derivatives

Dr. Shigeyuki Yamada, Keita Kinoshita, Shota Iwama, and Prof. Dr. Takashi Yamazaki\*

*Department of Applied Chemistry, Graduate School of Engineering,  
Tokyo University of Agriculture and Technology,  
2-24-16 Nakamachi, Koganei 184-8588, Tokyo, Japan  
Tel: +81 42 388 7038/ Fax: +81 42 388 7038  
E-mail: [tyamazak@cc.tuat.ac.jp](mailto:tyamazak@cc.tuat.ac.jp)*

Prof. Dr. Toshio Kubota

*Department of Biomolecular Functional Engineering, Ibaraki University,  
Nakanarusawa 4-12-1, Hitachi 31-8511, Japan  
Tel: +81 294 38 5060/ Fax: +81 294 38 5078  
E-mail: [t.kubota@mx.ibaraki.ac.jp](mailto:t.kubota@mx.ibaraki.ac.jp)*

Prof. Dr. Tomoko Yajima

*Department of Chemistry, Faculty of Science, Ochanomizu University,  
Otsuka, Bunkyo-ku, Tokyo 112-8610, Japan  
E-mail: [yajima.tomoko@ocha.ac.jp](mailto:yajima.tomoko@ocha.ac.jp)*

**General:**  $^1\text{H}$ ,  $^{13}\text{C}$  and  $^{19}\text{F}$  NMR spectra were measured with a JEOL JNM-AL300 (300.40 MHz for  $^1\text{H}$ , 75.45 MHz for  $^{13}\text{C}$  and 282.65 MHz for  $^{19}\text{F}$ ) spectrometer in a chloroform-*d* ( $\text{CDCl}_3$ ) solution with tetramethylsilane ( $\text{Me}_4\text{Si}$ ) and hexafluorobenzene ( $\text{C}_6\text{F}_6$ ;  $\delta$  -163.00 ppm for  $^{19}\text{F}$ ) as an internal reference. Infrared spectra (IR) were determined in a liquid film or KBr disk method with an FT/IR-4100 (JASCO). High resolution mass spectra were taken with a JEOL JMS-700 MS spectrometer. Elemental analyses were conducted with a PerkinElmer 2400 Series II CHNS/O System. Melting points were recorded on a Yamato Scientific MP-21 type instrument at atmospheric pressure. Column chromatography was carried out on silica gel (Kanto Chemical Co., Inc., Silica gel 60) and TLC analysis was performed on silica gel TLC plates (Merck, Silica gel 60 F<sub>254</sub>).

**Materials:** All reactions were carried out under an atmosphere of argon in dried glassware with magnetic stir bar. Anhydrous tetrahydrofuran (THF), diethyl ether and dichloromethane were purchased from Kanto Chemical Co., Inc. and used as received.  $\text{CF}_3\text{SiMe}_3$  was commercially available from Central Glass Co., Ltd. *n*-Butyllithium was also commercially available from Kanto Chemical Co., Inc. Methyllithium-lithium bromide complex was purchased from Sigma-Aldrich<sup>®</sup>. The concentration of both *n*-Butyllithium and methyllithium-lithium bromide complex was determined by titration using 1,10-phenanthroline and *sec*-Butanol prior to use. All chemicals were of reagent grade and, if necessary, were purified in the usual manner prior to use.

### Preparation of bromo-substituted anthraquinones **1b** and **1d**

2-Bromo-9,10-anthraquinone were prepared from the corresponding amino-counterparts according to reported procedure.<sup>1</sup> In a 100 mL round-bottomed flask with a magnetic stirrer bar was placed CuBr<sub>2</sub> (2.390 g, 10.7 mmol), *tert*-butyl nitrite (*tert*-BuONO, 1.103 g, 10.7 mmol), and MeCN (15 mL). To the suspension was added slowly a solution of 2-amino-9,10-anthraquinone (0.959 g, 4.30 mmol) in THF (35 mL), followed by stirring at room temperature for 20 h. After 20 h, the solvent was removed using rotary evaporator and the residue was filtered with rinsing by H<sub>2</sub>O. The filter-cake was purified by silica-gel column chromatography using hexane/CH<sub>2</sub>Cl<sub>2</sub> (1/1) as an eluent, giving pure 2-bromo-9,10-anthraquinone (0.984 g, 3.44 mmol, 80%) as a yellow solid.

2,6-Dibromo-9,10-anthraquinone (**1d**) was obtained in 52% yield by the reaction of 2,6-diamino-9,10-anthraquinone (2.380 g, 10 mmol) with CuBr<sub>2</sub> (4.470 g, 20 mmol) in the presence of *tert*-BuONO (2.4 mL, 20 mmol) in MeCN (40 mL) at 65 °C for 2 h, followed by the addition of 6*N* HCl aq. The obtained **1b** and **1d** are known compounds and were accordant with reported NMR data.

#### 2-Bromo-9,10-anthraquinone (**1b**)

<sup>1</sup>H NMR (CDCl<sub>3</sub>) δ 7.83 (dd, *J* = 5.9, 3.3 Hz, 2H), 7.93 (dd, *J* = 8.4, 2.1 Hz, 2H), 8.18 (d, *J* = 8.4 Hz, 1H), 8.32 (m, 2H), 8.44 (d, *J* = 2.1 Hz, 1H). <sup>13</sup>C NMR (CDCl<sub>3</sub>) δ 127.3, 127.4, 129.0, 129.7, 130.2, 132.1, 133.2, 133.3, 134.3, 134.4, 134.5, 137.1, 182.0, 182.3.

#### 2,6-Dibromo-9,10-anthraquinone (**1d**)

<sup>1</sup>H NMR (CDCl<sub>3</sub>) δ 7.95 (dd, *J* = 8.1, 2.1 Hz, 2H), 8.17 (d, *J* = 8.1 Hz, 2H), 8.44 (d, *J* = 2.1 Hz, 2H).

### Preparation of iodo-substituted anthraquinones **1c** and **1e**

2-Iodo-9,10-anthraquinone (**1c**) were prepared from the corresponding amino-counterparts according to reported procedure.<sup>2</sup> In a 100 mL round-bottomed flask with a stirrer bar was placed 2-amino-9,10-anthraquinone (1.780 g, 8 mmol) and 10 mL of concentrated HCl aq. (*c*-HCl). After cooling with ice-water bath, an aqueous solution of NaNO<sub>2</sub> (0.828 g, 12 mmol) in H<sub>2</sub>O (7.0 mL) was added dropwise, followed by being stirred below 0 °C for 1 h. To the whole was added slowly an aqueous solution of NaI (4.940 g, 33 mmol) in H<sub>2</sub>O (40 mL) *via* a syringe. After the addition, the reaction mixture was stirred at room temperature for 2 h, then continuously at 50 °C for overnight (approx. 15 h). To the reaction mixture was added aqueous sodium sulfite (Na<sub>2</sub>SO<sub>3</sub>)

solution, followed by the extraction with  $\text{CH}_2\text{Cl}_2$  (40 mL, 3 times). The organic layer was washed with aqueous NaOH solution, dried over  $\text{Na}_2\text{SO}_4$ , and concentrated by using rotary evaporator. The residue was column chromatographed by using hexane/ $\text{CH}_2\text{Cl}_2$  (1/1) as an eluent to obtain pure 2-iodo-9,10-anthraquinone (2.107 g, 6.30 mmol, 79%) as a reddish solid.

2,6-Diiodo-9,10-anthraquinone (**1e**) was obtained in 81% yield by the reaction of 2,6-diamino-9,10-anthraquinone (4.760 g, 20 mmol) with  $\text{NaNO}_2$  (3.360 g, 44 mmol) in 105 mL of mixed solvent (MeCN/*c*-HCl aq. = 2/1) at 0 °C for 0.5 h, followed by adding KI (8.300 g, 50 mmol), was carried out at 60 °C for 13 h.<sup>3</sup> The obtained **1b** and **1d** are known compounds and were accordant with reported NMR data.

### **2-Iodo-9,10-anthraquinone (1c)**

$^1\text{H}$  NMR ( $\text{CDCl}_3$ )  $\delta$  7.82 (dd,  $J$  = 5.7, 2.7 Hz, 2H), 8.00 (d,  $J$  = 8.1 Hz, 1H), 8.15 (dd,  $J$  = 8.1, 1.8 Hz, 2H), 8.30 (m, 2H), 8.49 (d,  $J$  = 1.8 Hz, 1H).  $^{13}\text{C}$  NMR ( $\text{CDCl}_3$ )  $\delta$  127.2, 127.3, 128.5, 132.4, 132.9, 133.1, 133.8, 134.0, 134.3, 134.4, 136.1, 143.0, 181.8, 182.5.

### **2,6-Diiodo-9,10-anthraquinone (1e)**

$^1\text{H}$  NMR ( $\text{CDCl}_3$ )  $\delta$  7.99 (d,  $J$  = 8.4 Hz, 2H), 8.18 (dd,  $J$  = 8.4, 1.8 Hz, 2H), 8.49 (d,  $J$  = 1.8 Hz, 2H).

### **Typical Procedure for the preparation of 9,10-bis(trifluoromethyl)-9,10-dihydroanthracen-9,10-diol (2a)<sup>4</sup>**

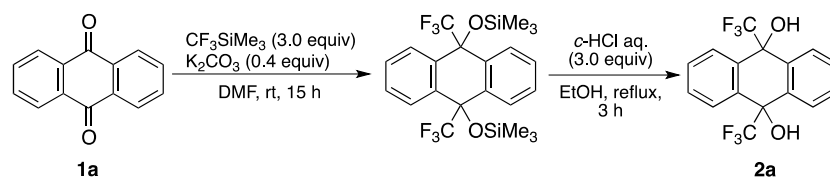

A 50 mL two-necked round-bottomed flask equipped with a magnetic stirrer bar, a rubber septum and an inlet tube for argon was charged with a 9,10-anthraquinone (2.082 g, 10 mmol) and  $\text{K}_2\text{CO}_3$  (0.553 g, 4.0 mmol) in DMF (20 mL). To the solution was added  $\text{CF}_3\text{SiMe}_3$  (3.30 mL, 22 mmol) via a syringe at 0 °C, followed by continuous stirring at room temperature for 15 h. After being stirred for 15 h, the whole was poured into mixed solution of sat.  $\text{NH}_4\text{Cl}$  (20 mL) and 1N HCl solution (5.0 mL), followed by extraction with  $\text{Et}_2\text{O}$  (40 mL, 3 times). The organic layers were dried over anhydrous  $\text{Na}_2\text{SO}_4$ , filtered and concentrated with a rotary evaporator. Column chromatography of the residue using hexane as an eluent yielded pure

9,10-bis(trifluoromethyl)-9,10-bis(trimethylsiloxy)-9,10-dihydroanthracene (4.039 g, 8.2 mmol, 82%) as a white solid.

**9,10-bis(trifluoromethyl)-9,10-bis(trimethylsiloxy)-9,10-dihydroanthracene**

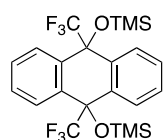

Yield: 82% (white solid). M.P. 118 – 120 °C.  $^1\text{H}$  NMR ( $\text{CDCl}_3$ )  $\delta$  –0.10 (s, 18H), 7.48 – 7.55 (m, 4H), 7.93 – 7.99 (m, 4H).  $^{19}\text{F}$  NMR ( $\text{CDCl}_3$ )  $\delta$  –79.29 (s).  $^{13}\text{C}$  NMR ( $\text{CDCl}_3$ )  $\delta$  1.7, 75.9 (q,  $J$  = 27.9 Hz), 125.7 (q,  $J$  = 289.0 Hz), 130.0, 130.7 (q,  $J$  = 3.1 Hz), 134.1. IR (KBr)  $\nu$  3073, 2968, 1487, 1447, 1411, 1237, 1175, 1075, 944, 930, 876, 846  $\text{cm}^{-1}$ . Anal. Calcd for: C, 53.64; H, 5.32. Found: C, 53.54; H, 5.38.

The bis(trimethylsilyl) ether obtained (3.541 g, 7.2 mmol) were mixed with concentrated hydrochloric acid (2.0 mL, 24 mmol) in EtOH (15 mL) and the whole was stirred at reflux temperature for 3 h. The reaction mixture was poured into aqueous saturated  $\text{NH}_4\text{Cl}$  solution (20 mL), followed by extraction with AcOEt (20 mL, 3 times). The organic layers were dried over anhydrous  $\text{Na}_2\text{SO}_4$ , filtered and concentrated with a rotary evaporator. Column chromatography of the residue using hexane/AcOEt (2/1) as an eluent yielded pure 9,10-bis(trifluoromethyl)-9,10-dihydroanthracen-9,10-diol (**2a**, 2.198 g, 6.3 mmol, 88%) as a white solid. In the preparation of **2b–e** were conducted hydrolysis without any purification of bis(trimethylsilyl) ether intermediates because the mixture of silyl ether and desilylated compounds were obtained in the first step.

**9,10-Bis(trifluoromethyl)-9,10-dihydroanthracen-9,10-diol (2a)**

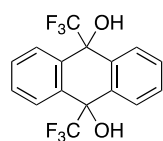

Yield: 88% (white solid). M.P. 197 – 199 °C.  $^1\text{H}$  NMR (Acetone- $d_6$ )  $\delta$  6.52 – 6.54 (m, 2H), 7.55 – 7.63 (m, 4H), 8.02–8.16 (m, 4H).  $^{19}\text{F}$  NMR (Acetone- $d_6$ )  $\delta$  –76.98 (s).  $^{13}\text{C}$  NMR (Acetone- $d_6$ )  $\delta$  73.7 (q,  $J$  = 27.3 Hz), 125.7 (q,  $J$  = 287.8 Hz), 129.4 (q,  $J$  = 3.1 Hz), 129.7, 135.0. IR (KBr)  $\nu$  3534, 3078, 1658, 1488, 1450, 1333, 1212, 1176, 1042, 912  $\text{cm}^{-1}$ . Anal. Calcd for: C, 53.64; H, 5.32. Found: C, 53.54; H, 5.38.

**2-Bromo-9,10-bis(trifluoromethyl)-9,10-dihydroanthracen-9,10-diol (2b)**

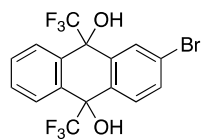

Yield: Quant (white solid). M.P. 165.0 – 166.1 °C.  $^1\text{H}$  NMR ( $\text{CDCl}_3$ )  $\delta$  □□□□ (dd,  $J$  = 6.0, 3.3 Hz, 2H), 7.71 (dd,  $J$  = 2.1 Hz, 1H), 7.91 (qd,  $J$  = 8.7, 2.3 Hz, 1H), 8.04 – 8.01 (m, 2H), 8.19 (t,  $J$  = 2.1 Hz, 1H).  $^{19}\text{F}$  NMR ( $\text{CDCl}_3$ )  $\delta$  □–79.34 (s, 3F), –79.40 (s, 3F).  $^{13}\text{C}$  NMR ( $\text{CDCl}_3$ )  $\delta$  72.9 (q,  $J$  = 28.0 Hz), 73.0 (q,  $J$  = 28.0 Hz),

123.7 (q,  $J = 285.7$  Hz), 123.8 (q,  $J = 285.7$  Hz), 124.3, 128.3 (q,  $J = 2.9$  Hz), 129.8, 129.9, 130.2 (q,  $J = 2.9$  Hz), 131.5 (q,  $J = 3.1$  Hz), 132.2, 132.7, 133.0, 135.2. IR (KBr)  $\nu$  3516, 3302, 3175, 1754, 1622, 1591, 1481, 1335, 1284, 1185, 940, 753  $\text{cm}^{-1}$ . HRMS (APCI-) Calcd for (M+)  $\text{C}_{16}\text{H}_9^{79}\text{BrF}_6\text{O}_2$ : 425.9690, Found 425.9667.

### **2-Iodo-9,10-bis(trifluoromethyl)-9,10-dihydroanthracen-9,10-diol (2c)**

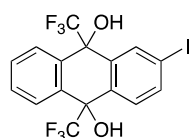

Yield: 91% (white solid). M.P. 177.0 – 178.0 °C.  $^1\text{H}$  NMR ( $\text{CDCl}_3$ )  $\delta$  7.56 (dd,  $J = 1.8, 6.0$  Hz, 2H), 7.75 (dq,  $J = 2.2, 8.5$  Hz, 1H), 7.91 (dd,  $J = 1.8, 8.4$  Hz, 1H), 8.04–8.00 (m, 2H), 8.39 (t,  $J = 2.1$  Hz, 1H).  $^{19}\text{F}$  NMR ( $\text{CDCl}_3$ )  $\delta$  -79.34 (s, 3F), -79.42 (s, 3F).  $^{13}\text{C}$  NMR ( $\text{CDCl}_3$ )  $\delta$  73.5 (q,  $J = 27.8$  Hz), 73.6 (q,  $J = 34.0$  Hz), 123.9 (q,  $J = 279.5$  Hz), 129.3 (q,  $J = 2.3$  Hz), 129.3, 129.4, 129.4, 130.1 (q,  $J = 2.9$  Hz), 131.5 (q,  $J = 290.0$ ), 133.0, 133.2, 135.4, 137.4 (q,  $J = 3.1$  Hz), 138.3, 138.4. IR (KBr)  $\nu$  3514, 3317, 3193, 3083, 2821, 1709, 1621, 1585, 1478, 1219, 934, 714,  $\text{cm}^{-1}$ . HRMS (FAB-) Calcd for (M+)  $\text{C}_{16}\text{H}_9\text{F}_6\text{O}_2\text{I}$ : 473.9551, Found 473.9540.

### **2,6-Dibromo-9,10-bis(trifluoromethyl)-9,10-dihydroanthracen-9,10-diol (2d)**

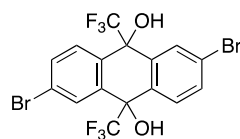

Yield: 85% (white solid). M.P. 275.0 – 276.0 °C.  $^1\text{H}$  NMR ( $\text{MeOH}-d_4$ )  $\delta$  7.73 (dq,  $J = 8.4, 2.2$  Hz, 2H), 7.93 (dd,  $J = 1.8, 8.7$  Hz, 2H), 8.12 (dq,  $J = 2.1, 2.1$  Hz, 2H).  $^{19}\text{F}$  NMR ( $\text{MeOH}-d_4$ )  $\delta$  -77.55 (s).  $^{13}\text{C}$  NMR ( $\text{MeOH}-d_4$ )  $\delta$  73.7 (q,  $J = 27.5$  Hz), 125.6 (q,  $J = 285.7$  Hz), 131.6 (q,  $J = 2.7$  Hz), 132.5 (q,  $J = 2.9$  Hz), 133.3, 134.4, 137.6. IR (KBr)  $\nu$  3548, 3356, 3109, 3083, 2979, 1800, 1666, 1563, 1482, 1343, 1189, 1048, 898, 780  $\text{cm}^{-1}$ . HRMS (FAB-) Calcd for (M+)  $\text{C}_{16}\text{H}_8\text{Br}_2\text{F}_6\text{O}_2$ : 503.8795, Found 503.8838.

### **2,6-Diiodo-9,10-bis(trifluoromethyl)-9,10-dihydroanthracen-9,10-diol (2e)**

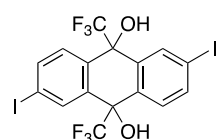

Yield: 74% (white solid). M.P. 284.0 – 285.5 °C.  $^1\text{H}$  NMR ( $\text{MeOH}-d_4$ )  $\delta$  2.96 (s, 2H), 7.72 (dq,  $J = 8.4, 2.2$  Hz, 2H), 7.91 (dd,  $J = 2.1, 8.7$  Hz, 2H), 8.31 (dq,  $J = 2.1, 2.1$  Hz, 2H).  $^{19}\text{F}$  NMR ( $\text{MeOH}-d_4$ )  $\delta$  -79.56 (s).  $^{13}\text{C}$  NMR ( $\text{MeOH}-d_4$ )  $\delta$  73.6 (q,  $J = 27.3$  Hz), 95.9, 125.2 (q,  $J = 286.1$  Hz), 131.4 (q,  $J = 2.5$  Hz), 134.9, 137.3, 138.7 (q,  $J = 2.8$  Hz), 139.2. IR (KBr)  $\nu$  3514, 3097, 2982, 2880, 1825, 1658, 1557, 1478, 1389, 1280, 1046, 718  $\text{cm}^{-1}$ .

### Typical procedure for the preparation of 9,10-bis(trifluoromethyl)anthracene (**3a**)

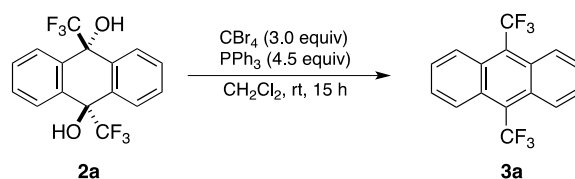

A 30 mL two-necked round-bottomed flask equipped with a magnetic stirrer bar, a rubber septum, and an inlet tube for argon was charged with a 9,10-bis(trifluoromethyl)anthracen-9,10-diol (**2a**, 0.104 g, 0.3 mmol) and  $\text{CBr}_4$  (0.298 g, 0.9 mmol) in  $\text{CH}_2\text{Cl}_2$  (2.0 mL). To the solution was slowly added  $\text{PPh}_3$  (0.367 g, 1.4 mmol) in  $\text{CH}_2\text{Cl}_2$  (2.0 mL) via a syringe at 0 °C, followed by continuous stirring at room temperature for 15 h. After being stirred for 15 h, the whole was poured into saturated aqueous  $\text{NH}_4\text{Cl}$  solution (20 mL), followed by extraction with  $\text{CH}_2\text{Cl}_2$  (20 mL, 3 times). The organic layers were dried over anhydrous  $\text{Na}_2\text{SO}_4$ , filtered and concentrated with a rotary evaporator. Column chromatography of the residue using hexane as an eluent yielded pure 9,10-bis(trifluoromethyl)anthracene (**3a**, 0.062 g, 66%) as a yellow powder.

### 9,10-Bis(trifluoromethyl)anthracene (**3a**)

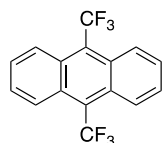

Yield: 66% (yellow powder). M.P. 152 – 154 °C.  $^1\text{H}$  NMR ( $\text{CDCl}_3$ )  $\delta$  7.56 – 7.64 (m, 4H), 8.45 – 8.56 (m, 4H).  $^{19}\text{F}$  NMR ( $\text{CDCl}_3$ )  $\delta$  –49.81 (s).  $^{13}\text{C}$  NMR ( $\text{CDCl}_3$ )  $\delta$  124.6 (q,  $J$  = 6.2 Hz), 125.6 (q,  $J$  = 276.6 Hz), 127.1, 128.9 (q,  $J$  = 42.2 Hz). IR (KBr)  $\nu$  3153, 3097, 3047, 1535, 1450, 1379, 1289, 1210, 1184, 1126, 1105, 956, 765, 675  $\text{cm}^{-1}$ . HRMS (APCI) Calcd for ( $\text{M}^+$ )  $\text{C}_{16}\text{H}_8\text{F}_6$ : 314.0530, Found 314.0504.

### 2-Bromo-9,10-bis(trifluoromethyl)anthracene (**3b**)

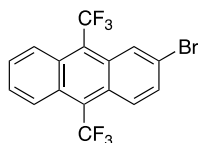

Yield: 94% (yellow powder). M.P. 79 – 80 °C.  $^1\text{H}$  NMR ( $\text{CDCl}_3$ )  $\delta$  7.64 (dd,  $J$  = 6.9, 3.3 Hz, 2H), 7.69 (d,  $J$  = 1.8 Hz, 1H), 8.38 (dd,  $J$  = 9.8, 2.0 Hz, 1H), 8.49 (m, 2H), 8.69 (t,  $J$  = 1.7 Hz, 1H).  $^{19}\text{F}$  NMR ( $\text{CDCl}_3$ )  $\delta$  –49.82 (s, 3F), –49.98 (s, 3F). IR (KBr)  $\nu$  3168, 3088, 3044, 2923, 1921, 1741, 1607, 1280, 1115, 957, 813, 702  $\text{cm}^{-1}$ . Anal. Calcd for  $\text{C}_{24}\text{H}_{12}\text{F}_6$ : C, 48.88; H, 1.79. Found: C, 48.48; H, 1.80.

### 2-Iodo-9,10-bis(trifluoromethyl)anthracene (**3c**)

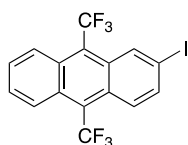

Yield: 52% (yellow powder). M.P. 100 – 101 °C.  $^1\text{H}$  NMR ( $\text{CDCl}_3$ )  $\delta$  7.63 (dd,  $J$  = 6.9, 3.3 Hz, 2H), 7.81 (dd,  $J$  = 9.8, 1.4 Hz, 1H), 8.21 (dd,  $J$  = 9.6, 1.8 Hz, 1H),

8.49 (dd,  $J = 5.4, 2.1$  Hz, 2H), 8.90 (s, 1H).  $^{19}\text{F}$  NMR ( $\text{CDCl}_3$ )  $\delta$  -49.83 (s, 3F), -49.84 (s, 3F).  $^{13}\text{C}$  NMR ( $\text{CDCl}_3$ )  $\delta$  119.7, 123.4, 124.6 (q,  $J = 6.0$  Hz), 124.6 (q,  $J = 5.8$  Hz), 126.2 (q,  $J = 28.7$  Hz), 127.1, 127.5, 127.7, 129.1 (q,  $J = 234.9$  Hz), 129.1 (q,  $J = 233.7$  Hz), 129.3, 129.6, 130.0, 133.3 (q,  $J = 6.2$  Hz), 133.3 (q,  $J = 6.4$  Hz), 135.5. IR (KBr)  $\nu$  3164, 3087, 3064, 3033, 1925, 1523, 1492, 1342, 1281, 1120, 1051, 955, 764  $\text{cm}^{-1}$ . Anal. Calcd for  $\text{C}_{16}\text{H}_7\text{F}_6\text{I}$ : C, 43.66; H, 1.60. Found: C, 43.80; H, 1.58.

### **2,6-Dibromo-9,10-bis(trifluoromethyl)anthracene (3d)**

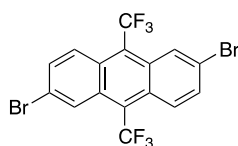

Yield: 73% (yellow powder). M.P. 206 – 207 °C.  $^1\text{H}$  NMR ( $\text{CDCl}_3$ )  $\delta$  7.69 (dd,  $J = 9.8, 1.7$  Hz, 2H), 8.36 (dd,  $J = 9.6, 1.1$  Hz, 2H), 8.66 (brs, 2H).  $^{19}\text{F}$  NMR ( $\text{CDCl}_3$ )  $\delta$  -50.00 (s).  $^{13}\text{C}$  NMR ( $\text{CDCl}_3$ )  $\delta$  122.9, 124.4 (q,  $J = 161.6$  Hz), 126.2 (q,  $J = 3.7$  Hz), 126.7 (q,  $J = 4.9$  Hz), 128.1, 129.8, 131.4. IR (KBr)  $\nu$  3452, 3171, 3068, 2997, 1925, 1768, 1614, 1520, 1412, 1345, 1270, 868, 806, 775, 714  $\text{cm}^{-1}$ . Anal. Calcd for  $\text{C}_{16}\text{H}_6\text{Br}_2\text{F}_6$ : C, 40.71; H, 1.28. Found: C, 40.70; H, 1.26.

### **2,6-Diiodo-9,10-bis(trifluoromethyl)anthracene (3e)**

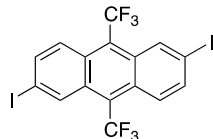

Yield: 84% (yellow powder). M.P. 234 – 235 °C.  $^1\text{H}$  NMR ( $\text{CDCl}_3$ )  $\delta$  7.85 (dd,  $J = 9.8, 1.7$  Hz, 2H), 8.02 (dd,  $J = 9.9, 1.5$  Hz, 2H), 8.88 (brs, 2H).  $^{19}\text{F}$  NMR ( $\text{CDCl}_3$ )  $\delta$  -49.90 (s).  $^{13}\text{C}$  NMR ( $\text{CDCl}_3$ )  $\delta$  124.8 (q,  $J = 283.6$  Hz), 124.9, 125.8 (q,  $J = 6.0$  Hz), 128.0, 130.1, 133.3 (q,  $J = 6.4$  Hz), 136.2. IR (KBr)  $\nu$  3442, 3166, 3153, 1929, 1774, 1601, 1515, 1210, 1124, 955, 806, 769  $\text{cm}^{-1}$ . Anal. Calcd for  $\text{C}_{16}\text{H}_6\text{F}_6\text{I}_2$ : C, 33.95; H, 1.07. Found: C, 33.91; H, 1.00.

### **Typical procedure for Suzuki-Miyaura cross-coupling reaction of 2-iodo-9,10-bis(trifluoromethyl)anthracene (3c) with aromatic boronic acid<sup>5</sup>**

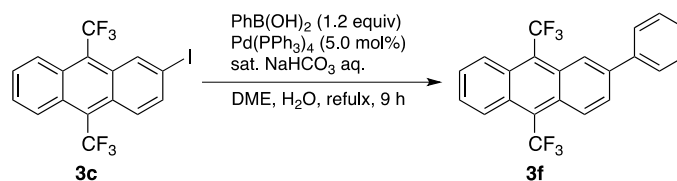

A 50 mL two-necked round-bottomed flask equipped with a magnetic stirrer bar, a rubber septum, and an inlet tube for argon was charged with a 2-iodo-9,10-bis(trifluoromethyl)anthracene (**3c**, 0.868 g, 1.97 mmol),  $\text{Pd}(\text{PPh}_3)_4$  (0.161 g, 0.1 mmol) in DME (10 mL). After stirring at room temperature for 20 min, to the resulting solution was added aqueous saturated  $\text{NaHCO}_3$  solution



(6.0 mL), phenylboronic acid (0.268 g, 2.2 mmol), and the whole was refluxed for 9 h. After being stirred for 9 h, the resulting mixture was poured into H<sub>2</sub>O (20 mL), followed by extraction with CH<sub>2</sub>Cl<sub>2</sub> (20 mL, 3 times). The organic layers were washed with 1N NaOH aq. (20 mL) and dried over anhydrous Na<sub>2</sub>SO<sub>4</sub>, filtered and concentrated with a rotary evaporator. Column chromatography of the residue using hexane as an eluent yielded pure 2-phenyl-9,10-bis(trifluoromethyl)anthracene (**3f**, 0.568 g, 1.46 mmol, 74%) as a yellow powder.

### **2-Phenyl-9,10-bis(trifluoromethyl)anthracene (3f)**

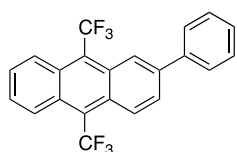

Yield: 74% (yellow powder). M.P. 105 – 106 °C. <sup>1</sup>H NMR (CDCl<sub>3</sub>) δ 7.43 – 7.46 (m, 1H), 7.55 (dd, *J* = 9.5, 1.7 Hz, 1H), 7.62 (dd, *J* = 6.6, 3.6 Hz, 2H), 7.78 (dd, *J* = 8.4, 1.2 Hz, 2H), 7.90 (dd, *J* = 9.5, 1.7 Hz, 1H), 8.51 (m, 2H), 8.60 (dd, *J* = 9.6, 2.1 Hz, 1H), 8.69 (t, *J* = 2.0 Hz, 1H). <sup>19</sup>F NMR (CDCl<sub>3</sub>) δ –49.70 (s, 3F), –49.83 (s, 3F). <sup>13</sup>C NMR (CDCl<sub>3</sub>) δ 121.9 (q, *J* = 5.6 Hz), 124.5 (q, *J* = 6.0 Hz), 124.6 (q, *J* = 5.8 Hz), 125.2 (q, *J* = 5.6 Hz), 125.5 (q, *J* = 29.0 Hz), 125.6 (q, *J* = 28.8 Hz), 125.6 (q, *J* = 28.0 Hz), 125.7 (q, *J* = 276.0 Hz), 125.7 (q, *J* = 275.4 Hz), 127.0, 127.0, 127.2 (q, *J* = 1.2 Hz), 127.4, 128.3, 128.4, 128.4, 129.1, 129.6 (q, *J* = 1.6 Hz), 139.3, 139.3, 139.8, 139.9. IR (KBr) ν 3447, 3065, 2957, 2852, 2352, 1920, 1631, 1581, 1493, 1290, 1186, 961, 884 cm<sup>-1</sup>. Anal. Calcd for C<sub>22</sub>H<sub>12</sub>F<sub>6</sub>: C, 67.70; H, 3.10. Found: C, 67.83; H, 2.80.

### **2-(4-Methoxyphenyl)-9,10-bis(trifluoromethyl)anthracene (3g)**

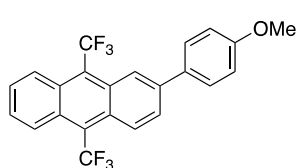

Yield: 80% (yellow powder). M.P. 118 – 119 °C. <sup>1</sup>H NMR (CDCl<sub>3</sub>) δ 3.89 (s, 3H), 7.61 (m, 2H), 7.727 (q, *J* = 5.0 Hz, 1H), 7.728 (ABq, *J* = 8.7 Hz, 2H), 7.89 (dd, *J* = 9.6, 2.1 Hz, 1H), 8.50 (dq, *J* = 7.5, 2.5 Hz, 2H), 8.57 (dq, *J* = 9.6, 2.3, 0.6 Hz, 1H), 8.62 (quint., *J* = 2.0 Hz, 1H). <sup>19</sup>F NMR (CDCl<sub>3</sub>) δ –49.82 (s, 3F), –49.88 (s, 3F). <sup>13</sup>C NMR (CDCl<sub>3</sub>) δ 55.3, 114.5, 120.7 (q, *J* = 5.6 Hz), 124.5 (q, *J* = 5.6 Hz), 124.6 (q, *J* = 5.6 Hz), 125.1 (q, *J* = 5.6 Hz), 125.2 (q, *J* = 26.3 Hz), 125.5 (q, *J* = 26.7 Hz), 125.6 (q, *J* = 275.8 Hz), 125.7 (q, *J* = 275.7 Hz), 126.9, 127.07, 127.10, 128.20, 128.22, 128.8, 128.9, 129.6, 129.7, 132.1, 138.7, 159.9. IR (KBr) ν 3434, 3132, 2964, 2898, 2360, 1578, 1496, 1252, 1187, 959, 812 cm<sup>-1</sup>. Anal. Calcd for C<sub>23</sub>H<sub>14</sub>F<sub>6</sub>O: C, 65.72; H, 3.36. Found: C, 65.46; H, 3.10.

### 2-[(4-Trifluoromethyl)phenyl]-9,10-bis(trifluoromethyl)anthracene (3h)

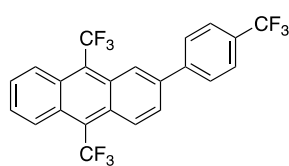

Yield: 90% (yellow powder). M.P. 114 – 116.0 °C.  $^1\text{H}$  NMR ( $\text{CDCl}_3$ )  $\delta$  7.65 (dd,  $J = 7.2, 3.3$  Hz, 2H), 7.80 (d,  $J = 7.8$  Hz, 2H), 7.80 (m, 3H), 8.53 (m, 2H), 8.64 (dq,  $J = 9.4, 2.0, 0.4$  Hz, 1H), 8.70 (quint.,  $J = 2.1$  Hz, 1H).  $^{19}\text{F}$  NMR ( $\text{CDCl}_3$ )  $\delta$  -49.68 (s, 3F), -49.89 (s, 3F), -63.85 (s, 3F).  $^{13}\text{C}$

NMR ( $\text{CDCl}_3$ )  $\delta$  124.1 (q,  $J = 270.0$  Hz), 124.6 (q,  $J = 5.9$  Hz), 124.7 (q,  $J = 5.9$  Hz), 125.5 (q,  $J = 275.8$  Hz), 125.6 (q,  $J = 275.8$  Hz), 125.6 (q,  $J = 5.6$  Hz), 126.0 (q,  $J = 4.4$  Hz), 126.6, 127.4, 127.5, 127.7, 128.4, 128.5, 129.2, 129.3, 129.36, 129.4, 129.68, 129.71, 130.3 (q,  $J = 32.3$  Hz), 137.7, 143.3. IR (KBr)  $\nu$  3416, 3139, 2923, 2851, 2360, 11529, 1496, 1383, 1174, 1074, 961, 817  $\text{cm}^{-1}$ . Anal. Calcd for  $\text{C}_{23}\text{H}_{11}\text{F}_9$ : C, 60.27; H, 2.42. Found: C, 60.10; H, 2.36.

### 2-(2-Thienyl)-9,10-bis(trifluoromethyl)anthracene (3i)

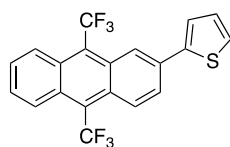

Yield: Quant (yellow powder). M.P. 137 – 138 °C.  $^1\text{H}$  NMR ( $\text{CDCl}_3$ )  $\delta$  7.18 (dd,  $J = 5.1, 3.6$  Hz, 1H), 7.43 (dd,  $J = 5.1, 0.9$  Hz, 1H), 7.56 (dd,  $J = 3.6, 0.9$  Hz, 1H), 7.61 (dd,  $J = 4.1, 2.9$  Hz, 1H), 7.61 (dd,  $J = 10.4, 0.8$  Hz, 1H), 7.89 (dd,  $J = 9.6, 2.1$  Hz, 1H), 8.52 (m, 3H), 8.69 (quint.,  $J = 2.1$  Hz, 1H).  $^{19}\text{F}$  NMR ( $\text{CDCl}_3$ )  $\delta$  -49.87 (s, 3F), -49.92 (s, 3F).  $^{13}\text{C}$  NMR ( $\text{CDCl}_3$ )  $\delta$  119.7 (q,  $J = 5.8$  Hz), 124.5 (q,  $J = 5.6$  Hz), 124.7 (q,  $J = 5.6$  Hz), 125.3 (q,  $J = 5.8$  Hz), 125.5 (q,  $J = 276.2$  Hz), 125.6 (q,  $J = 276.1$  Hz), 125.7 (q,  $J = 27.7$  Hz), 126.0, 126.6, 127.0, 127.3, 127.4, 128.5, 128.97, 128.99, 128.46, 129.48, 129.8, 132.6, 143.1. IR (KBr)  $\nu$  3155, 3048, 2924, 2849, 1742, 1616, 1517, 1474, 1285, 1192, 952, 763  $\text{cm}^{-1}$ .

Anal. Calcd for  $\text{C}_{20}\text{H}_{10}\text{F}_6\text{S}$ : C, 60.61; H, 2.54. Found: C, 60.22, 2.27.

### Typical procedure for Sonogashira cross-coupling of 2-iodo-9,10-bis(trifluoromethyl)anthracene (3c) with phenyl acetylene<sup>6</sup>

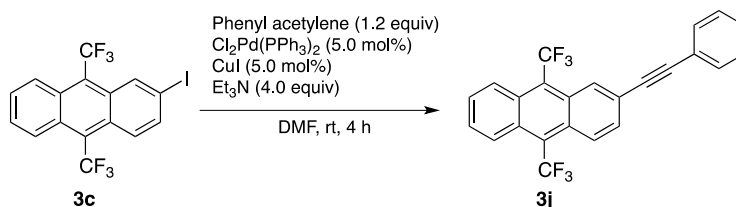

A 50 mL two-necked round-bottomed flask equipped with a magnetic stirrer bar, a rubber septum, and an inlet tube for argon was charged with a 2-iodo-9,10-bis(trifluoromethyl)anthracene (**3c**, 0.220 g, 0.50 mmol),  $\text{Cl}_2\text{Pd}(\text{PPh}_3)_2$  (0.018 g, 0.025 mmol), phenyl acetylene (0.070 mL, 0.60 mmol), CuI (0.005 g, 0.0025 mmol),  $\text{Et}_3\text{N}$  (0.28 mL, 2.0 mmol) in DMF (3.0 mL), and the whole was stirred at room temperature for 4 h. After being stirred for 4 h, the resulting mixture was

poured into saturated  $\text{NH}_4\text{Cl}$  aq. (20 mL), followed by extraction with  $\text{Et}_2\text{O}$  (20 mL, 3 times). The organic layers were dried over anhydrous  $\text{MgSO}_4$ , filtered and concentrated with a rotary evaporator. Column chromatography of the residue using hexane as an eluent yielded pure 2-phenylethynyl-9,10-bis(trifluoromethyl)anthracene (**3j**, 0.134 g, 0.34 mmol, 65%) as a yellow powder.

### 2-Phenylethynyl-9,10-bis(trifluoromethyl)anthracene (**3j**)

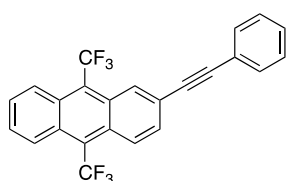

Yield: 65% (yellow powder). M.P. 110 – 112 °C.  $^1\text{H}$  NMR ( $\text{CDCl}_3$ )  $\delta$  7.38 – 7.42 (m, 3H), 7.61 – 7.69 (m, 5H), 8.45 – 8.52 (m, 3H), 8.69 (t,  $J$  = 2.1 Hz, 1H).  $^{19}\text{F}$  NMR ( $\text{CDCl}_3$ )  $\delta$  –49.77 (s, 3F), –49.88 (s, 3F).  $^{13}\text{C}$  NMR ( $\text{CDCl}_3$ )  $\delta$  89.1, 92.4, 122.3, 122.4, 122.6, 124.7 (q,  $J$  = 5.7 Hz), 124.7 (q,  $J$  = 5.8 Hz), 125.4 (q,  $J$  = 275.6 Hz), 125.4 (q,  $J$  = 275.4 Hz), 127.3, 127.4, 127.7 (q,  $J$  = 5.7 Hz), 128.4, 128.4, 128.5 (q,  $J$  = 41.3 Hz), 128.5 (q,  $J$  = 41.9 Hz), 128.8, 129.1, 129.7, 129.8, 130.90, 130.92, 131.4, 132.5. IR (KBr)  $\nu$  3432, 3142, 2925, 2364, 1960, 1615, 1434, 1288, 1027, 921, 852  $\text{cm}^{-1}$ . Anal. Calcd for  $\text{C}_{24}\text{H}_{12}\text{F}_6$ : C, 69.57; H, 2.92. Found: C, 69.48; H, 2.57.

### 2-(4-methoxyphenyl)ethynyl-9,10-bis(trifluoromethyl)anthracene (**3k**)

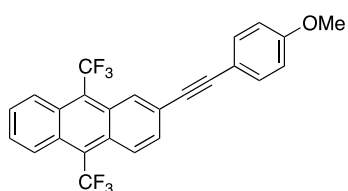

Yield: 80% (yellow powder). M.P. 123 – 124 °C.  $^1\text{H}$  NMR ( $\text{CDCl}_3$ )  $\delta$  3.86 (s, 3H), 6.93 (m, 2H), 7.61 (m, 5H), 8.48 (m, 3H), 8.65 (t,  $J$  = 1.8 Hz, 1H).  $^{19}\text{F}$  NMR ( $\text{CDCl}_3$ )  $\delta$  –49.87 (s, 3F), –49.93 (s, 3F).  $^{13}\text{C}$  NMR ( $\text{CDCl}_3$ )  $\delta$  55.2, 88.1, 92.6, 114.1, 114.6, 122.7, 124.5 (q,  $J$  = 5.4 Hz), 124.6 (q,  $J$  = 5.2 Hz), 125.0 (q,  $J$  = 28.4 Hz), 125.4 (q,  $J$  = 275.8 Hz), 125.7 (q,  $J$  = 28.6 Hz), 127.2 (q,  $J$  = 5.6 Hz), 127.4, 127.42 (q,  $J$  = 278.1 Hz), 128.09, 128.11, 128.80, 128.82, 129.29, 129.3, 129.4, 129.61, 129.63, 133.4, 160.0. IR (KBr)  $\nu$  3124, 3096, 2974, 2217, 1921, 1556, 1435, 1320, 914, 784  $\text{cm}^{-1}$ . Anal. Calcd for  $\text{C}_{25}\text{H}_{14}\text{F}_6\text{O}$ : C, 67.57; H, 3.18. Found: C, 67.50; H, 3.35.

### Typical procedure for Suzuki-Miyaura cross-coupling of 2,6-diiodo-9,10-bis(trifluoromethyl)anthracene (**3e**) with phenylboronic acid

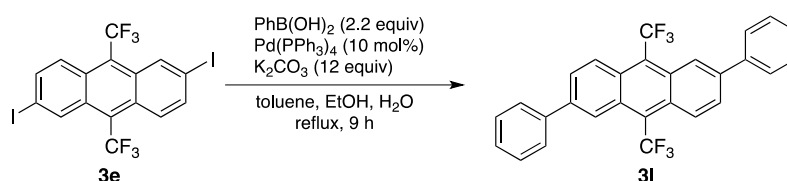

A 50 mL two-necked round-bottomed flask equipped with a magnetic stirrer bar, a rubber

septum, and an inlet tube for argon was charged with a 2,6-diiodo-9,10-bis(trifluoromethyl)anthracene (**3e**, 0.045 g, 0.08 mmol), Pd(PPh<sub>3</sub>)<sub>4</sub> (0.012 g, 0.010 mmol), phenylboronic acid (0.022 g, 0.18 mmol), K<sub>2</sub>CO<sub>3</sub> (0.163 g, 1.2 mmol) in H<sub>2</sub>O (2.0 mL) and EtOH (1.0 mL) and toluene (4.0 mL), and the whole was refluxed for 12 h. After being stirred for 12 h, the resulting mixture was poured into H<sub>2</sub>O (20 mL), followed by extraction with AcOEt (20 mL, 3 times). The organic layers were washed with 1N NaOH aq. (20 mL) and dried over anhydrous Na<sub>2</sub>SO<sub>4</sub>, filtered and concentrated with a rotary evaporator. Column chromatography of the residue using hexane as an eluent yielded pure 2,6-diphenyl-9,10-bis(trifluoromethyl)anthracene (**3l**, 0.030 g, 0.064 mmol, 81%) as a yellow powder.

### **2,6-Diphenyl-9,10-bis(trifluoromethyl)anthracene (3l)**

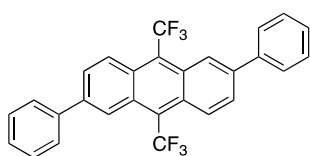

Yield: 81% (yellow powder). M.P. 211 – 213 °C. <sup>1</sup>H NMR (CDCl<sub>3</sub>) δ 7.48 (dd, *J* = 7.4, 2.3 Hz, 2H), 7.56 (dt, *J* = 7.4, 2.3 Hz, 4H), 7.79 (dd, *J* = 7.2, 1.8 Hz, 4H), 7.93 (dt, *J* = 9.7, 1.8 Hz, 2H), 8.61 (d, *J* = 9.7 Hz, 2H), 8.70 (d, *J* = 9.6 Hz, 2H). <sup>19</sup>F NMR (CDCl<sub>3</sub>) δ -49.75 (s). <sup>13</sup>C NMR (CDCl<sub>3</sub>) δ 122.0 (q, *J* = 2.5 Hz), 125.5 (q, *J* = 28.8 Hz), 125.7 (q, *J* = 269.9 Hz), 128.3, 128.8, 129.1, 129.5, 139.2, 139.8. IR (KBr) ν 3426, 3080, 2361, 1632, 1468, 1321, 1279, 1141, 962, 880 cm<sup>-1</sup>. Anal. Calcd for C<sub>28</sub>H<sub>16</sub>F<sub>6</sub>: C, 72.10; H, 3.46. Found: C, 72.25; H, 3.18.

### **2,6-Bis(4-methoxyphenyl)-9,10-bis(trifluoromethyl)anthracene (3m)**

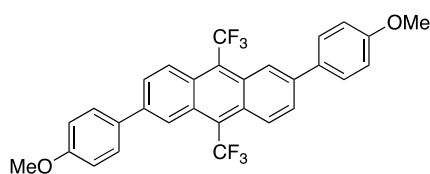

Yield: 66% (yellow powder). M.P. 226 – 228 °C. <sup>1</sup>H NMR (CDCl<sub>3</sub>) δ 3.90 (s, 6H), 7.08 (ABq, *J* = 8.7 Hz, 4H), 7.73 (ABq, *J* = 8.7 Hz, 4H), 7.89 (d, *J* = 9.6 Hz, 2H), 8.57 (d, *J* = 9.6 Hz, 2H), 8.62 (s, 2H). <sup>19</sup>F NMR (CDCl<sub>3</sub>) δ -49.86 (s). <sup>13</sup>C NMR (CDCl<sub>3</sub>) δ 55.4, 114.6, 121.0 (q, *J* = 6.2 Hz), 125.1 (q, *J* = 5.8 Hz), 127.2, 128.6, 132.3, 134.8, 138.6, 141.7, 159.9. IR (KBr) ν 3007, 2960, 2853, 2363, 1918, 1608, 1468, 1248, 1180, 963, 876 cm<sup>-1</sup>. HRMS (FAB) Calcd for (M<sup>+</sup>) C<sub>30</sub>H<sub>20</sub>F<sub>6</sub>O<sub>2</sub>: 526.1367, Found 526.1336.

### **2,6-Bis[4-(trifluoromethyl)phenyl]-9,10-bis(trifluoromethyl)anthracene (3n)**

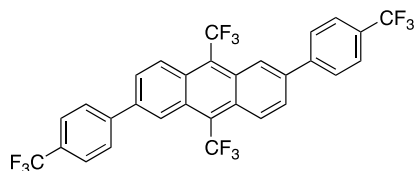

Yield: 90% (yellow powder). M.P. 217 – 218 °C. <sup>1</sup>H NMR (CDCl<sub>3</sub>) δ 7.81 (ABq, *J* = 8.1 Hz, 2H), 7.89 (ABq, *J* = 8.1 Hz,

2H), 7.92 (dd,  $J = 9.1, 1.5$  Hz, 2H), 8.68 (d,  $J = 8.4$  Hz, 2H), 8.72 (s, 2H).  $^{19}\text{F}$  NMR ( $\text{CDCl}_3$ )  $\delta$  -49.70 (s, 6F), -63.86 (s, 6F).  $^{13}\text{C}$  NMR ( $\text{CDCl}_3$ )  $\delta$  122.3, 122.8 (q,  $J = 6.2$  Hz), 125.5 (q,  $J = 275.6$  Hz), 125.7 (q,  $J = 6.0$  Hz), 126.1 (q,  $J = 3.7$  Hz), 127.1, 129.1, 129.5, 130.4 (q,  $J = 32.3$  Hz), 138.1, 143.3. IR (KBr)  $\nu$  3428, 3047, 2934, 2850, 1928, 1617, 1209, 1073, 847  $\text{cm}^{-1}$ . Anal. Calcd for  $\text{C}_{30}\text{H}_{14}\text{F}_{12}$ : C, 59.81; H, 2.34. Found: C, 59.51; H, 2.14.

### 2,6-Dithienenyl-9,10-bis(trifluoromethyl)anthracene (3o)

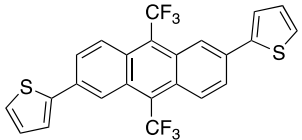 Yield: 82% (yellow powder). M.P. 241.8 – 242.3 °C.  $^1\text{H}$  NMR ( $\text{CDCl}_3$ )  $\delta$  7.19 (dd,  $J = 5.1, 3.6$  Hz, 2H), 7.43 (dd,  $J = 8.1, 0.9$  Hz, 2H), 7.57 (dd,  $J = 3.6, 0.9$  Hz, 2H), 7.90 (dd,  $J = 9.3, 1.8$  Hz, 2H), 8.52 (dd,  $J = 9.6, 1.2$  Hz, 2H), 8.68 (s, 2H).  $^{19}\text{F}$  NMR ( $\text{CDCl}_3$ )  $\delta$  -49.93 (s, 6F).  $^{13}\text{C}$  NMR ( $\text{CDCl}_3$ )  $\delta$  119.9 (q,  $J = 5.8$  Hz), 124.9, 125.3 (q,  $J = 3.3$  Hz), 125.6 (q,  $J = 280.5$  Hz), 126.3, 126.6, 128.5, 129.2 (q,  $J = 20.3$  Hz), 132.6, 143.2. IR (KBr)  $\nu$  3141, 3094, 2329, 1921, 1810, 1735, 1481, 1356, 1281, 1109, 948, 809, 777  $\text{cm}^{-1}$ . HRMS (APCI+) Calcd for (M+H)  $\text{C}_{24}\text{H}_{13}\text{F}_6\text{S}_2$ : 479.0363, Found 479.0352.

### Typical procedure for Sonogashira cross-coupling of 2,6-diiodo-9,10-bis(trifluoromethyl)anthracene (3e) with phenyl acetylene

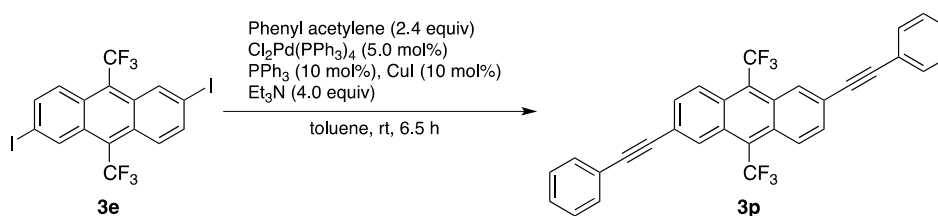

A 50 mL two-necked round-bottomed flask equipped with a magnetic stirrer bar, a rubber septum, and an inlet tube for argon was charged with a 2,6-diiodo-9,10-bis(trifluoromethyl)anthracene (**3e**, 0.028 g, 0.05 mmol),  $\text{Cl}_2\text{Pd}(\text{PPh}_3)_4$  (0.002 g, 0.003 mmol), phenyl acetylene (0.122 g, 0.12 mmol),  $\text{CuI}$  (0.001 g, 0.005 mmol),  $\text{PPh}_3$  (0.001 g, 0.004 mmol), and  $\text{Et}_3\text{N}$  (0.28 mL, 2.0 mmol) in toluene (0.3 mL), and the whole was stirred at room temperature for 6.5 h. After being stirred for 4 h, the resulting mixture was poured into saturated  $\text{NH}_4\text{Cl}$  aq. (20 mL), followed by extraction with  $\text{AcOEt}$  (20 mL, 3 times). The organic layers were dried over anhydrous  $\text{MgSO}_4$ , filtered and concentrated with a rotary evaporator. Column chromatography of the residue using hexane as an eluent yielded pure 2,6-bis(phenylethynyl)-9,10-bis(trifluoromethyl)anthracene (**3p**, 0.022 g, 0.043 mmol, 86%) as a yellow powder.

### **2,6-Bis(phenylethynyl)-9,10-bis(trifluoromethyl)anthracene (3p)**

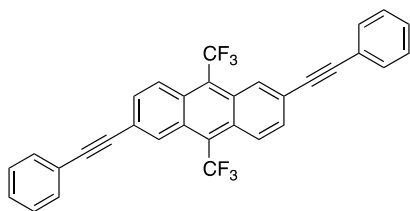

Yield: 86% (yellow powder). M.P. 215 – 216 °C.  $^1\text{H}$  NMR ( $\text{CDCl}_3$ )  $\delta$  7.41 (t,  $J$  = 3.2 Hz, 6H), 7.64 (q,  $J$  = 3.2 Hz, 4H), 7.69 (dd,  $J$  = 9.3, 0.9 Hz, 2H), 8.48 (d,  $J$  = 8.7 Hz, 2H).  $^{19}\text{F}$  NMR ( $\text{CDCl}_3$ )  $\delta$  -46.20 (s, 6F).  $^{13}\text{C}$  NMR ( $\text{CDCl}_3$ )  $\delta$  89.1, 92.7, 122.5, 122.7, 124.8 (q,  $J$  = 5.8 Hz), 125.1, 125.2 (q,  $J$  = 304.6 Hz), 125.3 (q,  $J$  = 29.0 Hz), 127.7 (q,  $J$  = 6.0 Hz), 128.5, 128.7, 128.9, 129.0, 129.7, 131.9. IR (KBr)  $\nu$  3437, 3148, 2995, 2210, 1625, 1496, 1326, 1285, 1172, 994, 881, 720  $\text{cm}^{-1}$ . Anal. Calcd for  $\text{C}_{32}\text{H}_{16}\text{F}_6$ : C, 74.71; H, 3.13. Found: C, 74.67; H, 2.96.

### **2,6-Bis[(4-methoxyphenyl)ethynyl]-9,10-bis(trifluoromethyl)anthracene (3q)**

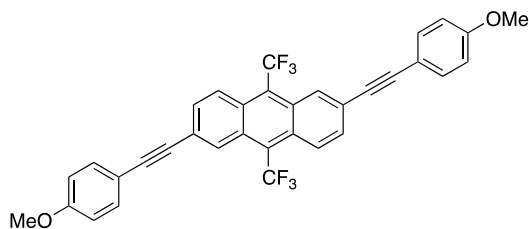

Yield: 57% (reddish crystal). M.P. 215 – 216 °C.  $^1\text{H}$  NMR ( $\text{CDCl}_3$ )  $\delta$  3.86 (s, 6H), 6.93 (ABq,  $J$  = 8.7 Hz, 4H), 7.57 (ABq,  $J$  = 8.7 Hz, 4H), 7.67 (m, 2H), 8.45 (m, 2H), 8.63 (m, 2H).  $^{19}\text{F}$  NMR ( $\text{CDCl}_3$ )  $\delta$  -49.00 (s, 6F). IR (KBr)  $\nu$  3122, 3076, 2962, 1626, 1514, 1325, 1252, 1171, 1010, 925, 840, 796  $\text{cm}^{-1}$ . HRMS (APCI-) Calcd for ( $\text{M}^+$ )  $\text{C}_{34}\text{H}_{20}\text{F}_6\text{O}_2$ : 574.1367, Found 574.1385. Data  $^{13}\text{C}$  NMR for this compound **3p** was not obtained due to low solubility in any deuterated solvents.

**Optimization of the reaction conditions for the preparation of 9-trifluoromethyl-9-trimethylsiloxy- anthracen-10-one (4a)**

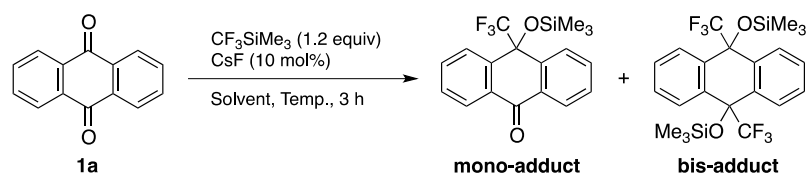

| Entry          | Solvent | Temp.<br>/°C | Yield <sup>a</sup> /%<br>of <b>mono-adduct</b> | Yield <sup>a</sup> /%<br>of <b>bis-adduct</b> |
|----------------|---------|--------------|------------------------------------------------|-----------------------------------------------|
| 1 <sup>b</sup> | DMF     | 25           | 43                                             | 27                                            |
| 2              | DME     | -25          | 30                                             | 33                                            |
| 3              | DME     | 0            | 4                                              | 42                                            |
| 4              | DME     | rt           | 29 [18]                                        | 33                                            |
| 5              | DME     | 40           | 10                                             | 28                                            |
| 6 <sup>c</sup> | DME     | rt           | 80 [70]                                        | 5                                             |
| 7 <sup>c</sup> | THF     | rt           | [90]                                           | -                                             |

<sup>a</sup> Determined by <sup>19</sup>F NMR. Values in bracket are of isolated yields. <sup>b</sup> Reaction of **1a** with 1.1 equiv of CF<sub>3</sub>SiMe<sub>3</sub> in the presence of 0.2 equiv of K<sub>2</sub>CO<sub>3</sub> in DMF at room temperature for 4 h was performed according to the reported procedure, see: Ref.[4a]. <sup>c</sup> To the mixture of **1a** and CsF in the solvent was **added slowly the diluted solution** of CF<sub>3</sub>SiMe<sub>3</sub> in the solvent.

### Typical procedure for the preparation of 9-(trifluoromethyl)-9-(trimethylsiloxy)-anthracen-10-one (**4a**) under the optimized reaction conditions (entry 7)

A 300 mL three-necked round-bottomed flask equipped with a magnetic stirrer bar, a rubber septum, 30 mL of dropping funnel, and an inlet tube for argon was charged with 9,10-anthraquinone (**1a**, 4.164 g, 20 mmol) and CsF (0.304 g, 2.0 mmol) in THF (150 mL). *To the whole was added slowly the diluted solution of CF<sub>3</sub>SiMe<sub>3</sub> (3.55 mL, 24 mmol) in THF (25 mL)*, followed by stirring at room temperature for 3 h. The resultant was poured into saturated NH<sub>4</sub>Cl aq. (30 mL), followed by extraction with AcOEt (30 mL, 3 times). The organic layers were dried over anhydrous Na<sub>2</sub>SO<sub>4</sub>, filtered and concentrated with a rotary evaporator. Column chromatography of the residue using hexane/CH<sub>2</sub>Cl<sub>2</sub> (2/1) as an eluent yielded pure 9-(trifluoromethyl)-9-(trimethylsiloxy)anthracen-10-one (**4a**, 6.311 g, 18.0 mmol, 90%) as a white powder.

### 9-(Trifluoromethyl)-9-(trimethylsiloxy)anthracen-10-one (**4a**)

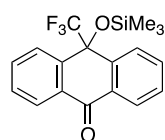

Yield: 90% (white solid). M.P. 84 – 86 °C. <sup>1</sup>H NMR (CDCl<sub>3</sub>) δ -0.09 (s, 9H), 7.63 (td, J = 7.2, 1.2 Hz, 2H), 7.74 (td, J = 7.2, 1.2 Hz, 2H), 7.99 (t, J = 1.5 Hz, 1H), 8.02 (t, J = 1.5 Hz, 1H), 8.32 (d, J = 1.2 Hz, 1H), 8.35 (d, J = 1.2 Hz, 1H). <sup>19</sup>F NMR

(CDCl<sub>3</sub>) δ -80.66 (s, 3F). <sup>13</sup>C NMR (CDCl<sub>3</sub>) δ 1.7, 74.6 (q, J = 29.7 Hz), 123.8 (q, J = 286.5 Hz), 127.4, 129.0 (q, J = 1.8 Hz), 129.9, 131.4, 133.0, 139.0, 182.6. IR (KBr) ν 006, 2971, 2905, 1668, 1599, 1457, 1253, 1082, 956, 818, 712, 679 cm<sup>-1</sup>. HRMS (APCI+) Calcd for (M+H) C<sub>18</sub>H<sub>18</sub>F<sub>3</sub>O<sub>2</sub>Si: 351.1028, Found 351.1008.



## Typical procedure for the preparation of 9-(nonafluorobutyl)-10-(trifluoromethyl)anthracene-9,10-diol (5aA)

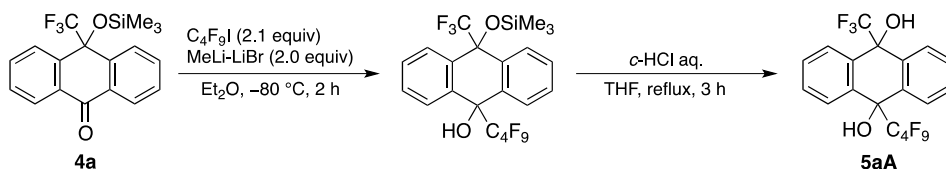

A 30 mL three-necked round-bottomed flask equipped with a magnetic stirrer bar, a rubber septum, 10 mL of dropping funnel and an inlet tube for argon was charged with a 9-(trifluoromethyl)-9-(trimethylsiloxy)anthracen-10-one (**4a**, 0.350 g, 1.0 mmol) and nonafluorobutyl iodide (0.36 mL, 2.1 mmol) in Et<sub>2</sub>O (10 mL). To the solution was added MeLi-LiBr in Et<sub>2</sub>O (1.5 M, 1.33 mL, 2.0 mmol) *via* a syringe at -80 °C, followed by continuous stirring at the same temperature. After being stirred for 2 h, the whole was poured into the aqueous solution of sat. NH<sub>4</sub>Cl (10 mL), followed by extraction with Et<sub>2</sub>O (10 mL, 3 times). The organic layers were dried over anhydrous Na<sub>2</sub>SO<sub>4</sub>, filtered and concentrated with a rotary evaporator. Column chromatography of the residue using hexane/CH<sub>2</sub>Cl<sub>2</sub> (2/1) as an eluent yielded pure 9-(nonafluorobutyl)-10-(trifluoromethyl)-10-(trimethylsiloxy)anthracen-9-ol (0.449 g, 0.79 mmol, 79%) as a white solid.

### 9-(Nonafluorobutyl)-10-(trifluoromethyl)-10-(trimethylsiloxy)anthracen-9-ol

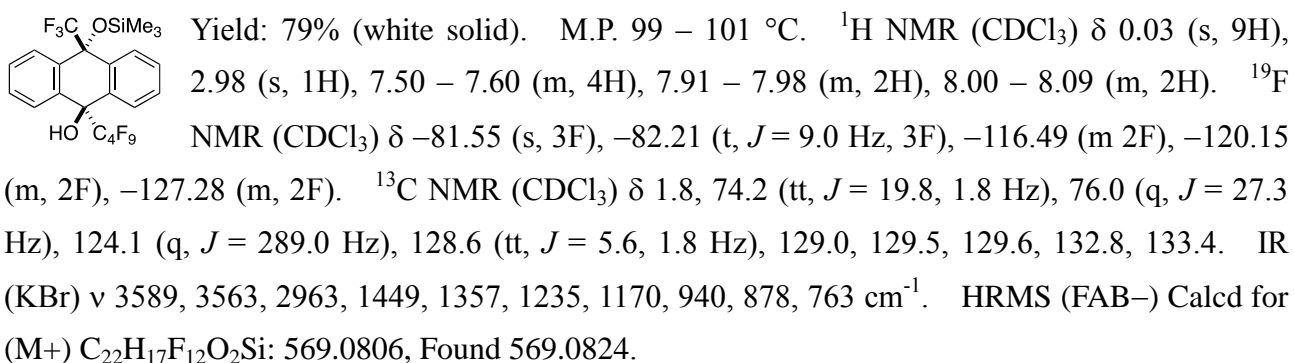

### 9-(Tridecafluorohexyl)-10-(trifluoromethyl)-10-(trimethylsiloxy)anthracen-9-ol

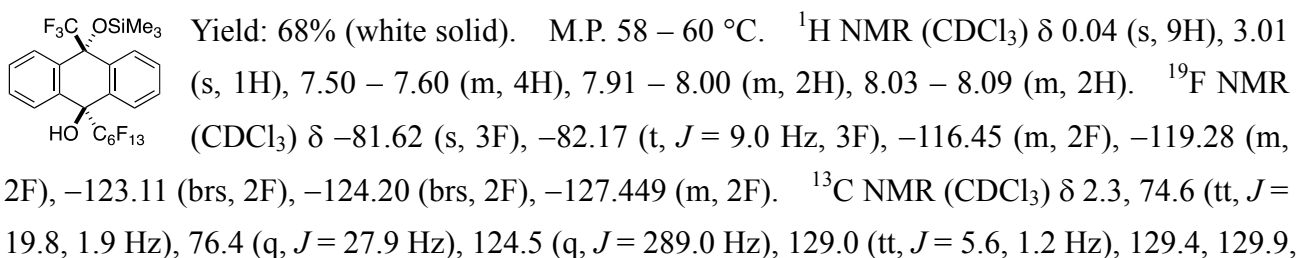



130.0, 133.2, 133.8. IR (KBr)  $\nu$  3585, 3445, 2966, 1237, 1198, 1151, 1032, 937, 848, 761  $\text{cm}^{-1}$ . HRMS (APCI-) Calcd for (M+)  $\text{C}_{24}\text{H}_{18}\text{F}_{16}\text{O}_2\text{Si}$ : 670.0821, Found 670.0804.

### **9-(Heptadecafluorooctyl)-10-(trifluoromethyl)-10-(trimethylsiloxy)anthracen-9-ol**

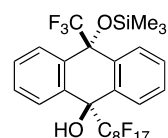 Yield: 70% (white solid). M.P. 84 – 86 °C.  $^1\text{H}$  NMR ( $\text{CDCl}_3$ )  $\delta$  0.03 (s, 9H), 2.98 (s, 1H), 7.50 – 7.59 (m, 4H), 7.91 – 7.97 (m, 2H), 8.03 – 8.09 (m, 2H).  $^{19}\text{F}$  NMR ( $\text{CDCl}_3$ )  $\delta$  -81.59 (s, 3F), -82.07 (t,  $J$  = 9.0 Hz, 3F), -116.40 (m, 2F), -119.18 (brs, 2F), -122.90 (brs, 2F), -123.22 (brs, 4F), -124.08 (brs, 2F), -127.44 (m, 2F).  $^{13}\text{C}$  NMR ( $\text{CDCl}_3$ )  $\delta$  1.8, 74.3 (tt,  $J$  = 19.9, 2.4 Hz), 76.0 (q,  $J$  = 27.9 Hz), 124.2 (q,  $J$  = 289.0 Hz), 128.6 (t,  $J$  = 5.6 Hz), 128.9, 129.5, 129.6, 132.8, 133.5. IR (KBr)  $\nu$  3586, 3078, 2971, 1371, 1235, 1180, 1155, 1035, 908, 877, 763  $\text{cm}^{-1}$ . HRMS (APCI-) Calcd for (M+)  $\text{C}_{26}\text{H}_{18}\text{F}_{20}\text{O}_2\text{Si}$ : 770.0757, Found 770.0758.

### **9-(Henicosafluorodecyl)-10-(trifluoromethyl)-10-(trimethylsiloxy)anthracen-9-ol**

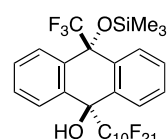 Yield: 53% (white solid). M.P. 107 – 109 °C.  $^1\text{H}$  NMR ( $\text{CDCl}_3$ )  $\delta$  0.04 (s, 9H), 3.01 (s, 1H), 7.50 – 7.59 (m, 4H), 7.92 – 7.97 (m, 2H), 8.03 – 8.09 (m, 2H).  $^{19}\text{F}$  NMR ( $\text{CDCl}_3$ )  $\delta$  -81.60 (s, 3F), -82.05 (t,  $J$  = 9.3 Hz, 3F), -116.41 (brs, 2F), -119.20 (brs, 2F), -123.13 (brs, 10F), -124.04 (brs, 2F), -127.42 (brs, 2F).  $^{13}\text{C}$  NMR ( $\text{CDCl}_3$ )  $\delta$  2.1, 74.6 (tt,  $J$  = 19.8, 1.9 Hz), 76.4 (q,  $J$  = 27.9 Hz), 124.5 (q,  $J$  = 289.0 Hz), 129.0 (t,  $J$  = 5.6 Hz), 129.4, 129.9, 130.0, 133.2, 133.8. IR (KBr)  $\nu$  3585, 3076, 2973, 1339, 1224, 1173, 1160, 1037, 940, 879, 763  $\text{cm}^{-1}$ . HRMS (FAB-) Calcd for (M+)  $\text{C}_{28}\text{H}_{18}\text{F}_{24}\text{O}_2\text{Si}$ : 870.0693, Found 870.0744.

The silyl ether obtained (0.506 g, 0.89 mmol) was mixed with concentrated hydrochloric acid (0.5 mL, 6.0 mmol) in THF (5.0 mL) and the whole was stirred at reflux temperature for 3 h. The reaction mixture was poured into aqueous saturated  $\text{NH}_4\text{Cl}$  solution (10 mL), followed by extraction with AcOEt (10 mL, 3 times). The organic layers were dried over anhydrous  $\text{Na}_2\text{SO}_4$ , filtered and concentrated with a rotary evaporator. Column chromatography of the residue using hexane/ $\text{CH}_2\text{Cl}_2$  (1/2) as an eluent yielded pure 9-nonafluorobutyl-10-trifluoromethylanthracene-9,10-diol (**5aA**, 0.351 g, 0.71 mmol, 79%) as a white solid.

### **9-(Nonafluorobutyl)-10-(trifluoromethyl)anthracene-9,10-diol (5aA)**

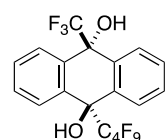 Yield: 79% (white solid). M.P. 118 – 120 °C.  $^1\text{H}$  NMR ( $\text{CDCl}_3$ )  $\delta$  2.88 (s, 1H),

3.15 (d,  $J = 1.2$  Hz, 1H), 7.55 – 7.63 (m, 4H), 8.00 – 8.08 (m, 4H).  $^{19}\text{F}$  NMR ( $\text{CDCl}_3$ )  $\delta$  –79.19 (s, 3F), –82.19 (t,  $J = 9.0$  Hz, 3F), –119.32 (m, 2F), –121.64 (m, 2F), –127.47 (m, 2F).  $^{13}\text{C}$  NMR ( $\text{CDCl}_3$ )  $\delta$  73.3 (q,  $J = 27.9$  Hz), 73.7 (tt,  $J = 18.6, 2.5$  Hz), 124.0 (q,  $J = 287.8$  Hz), 128.3 (q,  $J = 3.1$  Hz), 128.4 (t,  $J = 5.6$  Hz), 129.8, 129.9, 132.6, 132.8. IR (KBr)  $\nu$  3610, 3481, 3083, 1450, 1363, 1202, 1185, 1135, 1026, 804, 767  $\text{cm}^{-1}$ . HRMS (FAB–) Calcd for (M–H)  $\text{C}_{19}\text{H}_9\text{F}_{12}\text{O}_2$ : 497.0411, Found 497.0401.

### **9-(Tridecafluorohexyl)-10-(trifluoromethyl)anthracen-9,10-diol (5aB)**

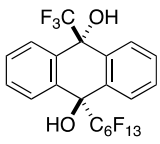 Yield: 77% (white solid). M.P. 91 – 93 °C.  $^1\text{H}$  NMR ( $\text{CDCl}_3$ )  $\delta$  2.88 (d,  $J = 3.0$  Hz, 1H), 3.16 (dd,  $J = 3.9, 1.2$  Hz, 1H), 7.58 – 7.63 (m, 4H), 8.01 – 8.07 (m, 4H).  $^{19}\text{F}$  NMR ( $\text{CDCl}_3$ )  $\delta$  –79.17 (s, 3F), –82.17 (t,  $J = 9.0$  Hz, 3F), –119.15 (m, 2F), –120.06 (m, 2F), –123.28 (brs, 2F), –124.15 (brs, 2F), –127.56 (m, 2F).  $^{13}\text{C}$  NMR ( $\text{CDCl}_3$ )  $\delta$  73.2 (q,  $J = 27.9$  Hz), 73.7 (tt,  $J = 19.2, 1.8$  Hz), 124.0 (q,  $J = 287.2$  Hz), 128.3 (q,  $J = 2.5$  Hz), 128.4 (t,  $J = 5.6$  Hz), 129.6, 129.8, 132.7, 132.9. IR (KBr)  $\nu$  3489, 3228, 1453, 1360, 1244, 1182, 1025, 924, 768  $\text{cm}^{-1}$ . HRMS (FAB–) Calcd for (M–H)  $\text{C}_{21}\text{H}_9\text{F}_{16}\text{O}_2$ : 597.0347, Found 597.0385.

### **9-(Heptadecafluorooctyl)-10-(trifluoromethyl)anthracen-9,10-diol (5aC)**

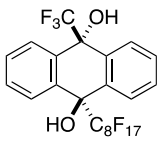 Yield: 82% (white solid). M.P. 117 – 119 °C.  $^1\text{H}$  NMR ( $\text{CDCl}_3$ )  $\delta$  2.87 (s, 1H), 3.15 (d,  $J = 1.2$  Hz, 1H), 7.54 – 7.63 (m, 4H), 8.00 – 8.08 (m, 4H).  $^{19}\text{F}$  NMR ( $\text{CDCl}_3$ )  $\delta$  –79.17 (s, 3F), –82.09 (t,  $J = 9.0$  Hz, 3F), –119.12 (m, 2F), –120.58 (m, 2F), –123.10 (m, 4F), –123.34 (m, 2F), –124.13 (brs, 2F), –127.47 (m, 2F).  $^{13}\text{C}$  NMR ( $\text{CDCl}_3$ )  $\delta$  73.2 (q,  $J = 27.9$  Hz), 73.9 (tt,  $J = 18.6, 1.8$  Hz), 124.0 (q,  $J = 287.8$  Hz), 128.3 (q,  $J = 3.1$  Hz), 128.4 (t,  $J = 5.6$  Hz), 129.7, 129.8, 132.7, 132.8. IR (KBr)  $\nu$  3596, 3440, 3086, 1450, 1368, 1211, 1151, 1019, 919, 766  $\text{cm}^{-1}$ . HRMS (FAB–) Calcd for (M+)  $\text{C}_{23}\text{H}_{10}\text{F}_{20}\text{O}_2$ : 698.0361, Found 698.0434.

### **9-(Henicosafluorodecyl)-10-(trifluoromethyl)anthracen-9,10-diol (5aD)**

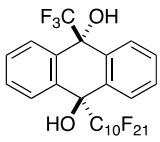 Yield: 80% (white solid). M.P. 132 – 134 °C.  $^1\text{H}$  NMR ( $\text{CDCl}_3$ )  $\delta$  2.86 (s, 1H), 3.14 (d,  $J = 0.6$  Hz, 1H), 7.55 – 7.64 (m, 4H), 8.01 – 8.08 (m, 4H).  $^{19}\text{F}$  NMR ( $\text{CDCl}_3$ )  $\delta$  –79.17 (s, 3F), –82.05 (t,  $J = 9.3$  Hz, 3F), –119.11 (brs, 2F), –120.57 (brs, 2F), –123.14 (brs, 10F), –124.06 (brs, 2F), –127.45 (brs, 2F).  $^{13}\text{C}$  NMR ( $\text{CDCl}_3$ )  $\delta$  73.2 (q,  $J = 27.9$  Hz), 73.7 (tt,  $J = 14.3, 1.8$  Hz), 124.0 (q,  $J = 287.2$  Hz), 128.3 (q,  $J = 3.1$  Hz), 128.4 (t,  $J = 5.6$  Hz), 129.7, 129.8, 132.6, 132.8. IR (KBr)  $\nu$  3585, 3077, 2910, 1450, 1338, 1222, 1175, 1037, 939,

879, 763  $\text{cm}^{-1}$ . HRMS (APCI-) Calcd for (M-H)  $\text{C}_{25}\text{H}_9\text{F}_{24}\text{O}_2$ : 797.0219, Found 797.0199.

### Typical procedure for the preparation of 9-nonafluorobutyl-10-trifluoromethylantracene (6aA)

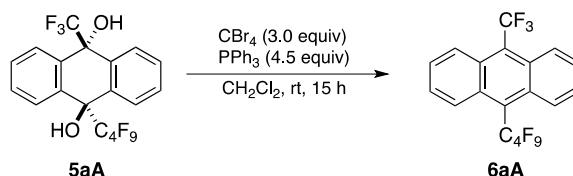

A 30 mL two-necked round-bottomed flask equipped with a magnetic stirrer bar, a rubber septum, and an inlet tube for argon was charged with a 9-nonafluorobutyl-10-trifluoromethylantracene-9,10-diol (**5aA**, 0.232 g, 0.47 mmol) and  $\text{CBr}_4$  (0.468 g, 1.4 mmol) in  $\text{CH}_2\text{Cl}_2$  (5.0 mL). To the solution was slowly added  $\text{PPh}_3$  (0.551 g, 2.1 mmol) in one portion at 0 °C, followed by continuous stirring at room temperature for 15 h. After being stirred for 15 h, the whole was poured into saturated aqueous  $\text{NH}_4\text{Cl}$  solution (10 mL), followed by extraction with  $\text{CH}_2\text{Cl}_2$  (5.0 mL, 3 times). The organic layers were dried over anhydrous  $\text{Na}_2\text{SO}_4$ , filtered and concentrated with a rotary evaporator. Column chromatography of the residue using hexane as an eluent yielded pure 9-nonafluorobutyl-10-trifluoromethylantracene (**6aA**, 0.205 g, 0.44 mmol, 93%) as a yellow powder.

#### 9-(Nonafluorobutyl)-10-(trifluoromethyl)anthracene (6aA)

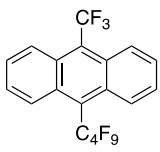 Yield: 93% (yellow powder). M.P. 89 – 91 °C.  $^1\text{H}$  NMR ( $\text{CDCl}_3$ )  $\delta$  7.57 – 7.65 (m, 4H), 8.35 – 8.45 (m, 2H), 8.50 – 8.55 (m, 4H).  $^{19}\text{F}$  NMR ( $\text{CDCl}_3$ )  $\delta$  -49.62 (s, 3F), -81.87 (t,  $J$  = 9.0 Hz, 3F), -93.04 (t,  $J$  = 16.1 Hz, 2F), -119.39 (q,  $J$  = 11.6 Hz, 2F), -126.86 (m, 2F).  $^{13}\text{C}$  NMR ( $\text{CDCl}_3$ )  $\delta$  124.8 (q,  $J$  = 6.3 Hz), 125.4 (tt,  $J$  = 9.9, 4.3 Hz), 125.6 (q,  $J$  = 277.9 Hz), 126.4, 126.9 (q,  $J$  = 1.2 Hz), 127.2 (t,  $J$  = 2.3 Hz), 129.4, 131.0 (t,  $J$  = 2.5 Hz). IR (KBr)  $\nu$  3155, 3100, 3052, 1350, 1290, 1238, 1134, 1032, 932, 829, 765  $\text{cm}^{-1}$ . HRMS (FAB-) Calcd for (M+)  $\text{C}_{19}\text{H}_8\text{F}_{12}$ : 464.0434, Found 464.0402.

#### 9-(Tridecafluorohexyl)-10-(trifluoromethyl)anthracene (6aB)

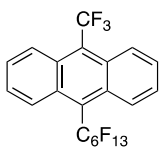 Yield: 64% (yellow powder). M.P. 101 – 103 °C.  $^1\text{H}$  NMR ( $\text{CDCl}_3$ )  $\delta$  7.57 – 7.65 (m, 4H), 8.36 – 8.46 (m, 2H), 8.46 – 8.56 (m, 4H).  $^{19}\text{F}$  NMR ( $\text{CDCl}_3$ )  $\delta$  -49.64 (s,

3F),  $-81.94$  (t,  $J = 9.0$  Hz, 3F),  $-92.92$  (t,  $J = 15.8$  Hz, 2F),  $-118.52$  (m, 2F),  $-122.76$  (m, 2F),  $-123.74$  (m, 2F),  $-127.22$  (m, 2F).  $^{13}\text{C}$  NMR ( $\text{CDCl}_3$ )  $\delta$   $124.7$  (q,  $J = 5.6$  Hz),  $125.4$  (tt,  $J = 9.3$ ,  $4.4$  Hz),  $125.5$  (q,  $J = 277.3$  Hz),  $125.8$ ,  $126.4$ ,  $126.8$ ,  $127.2$ ,  $129.4$ ,  $131.0$ . IR (KBr)  $\nu$   $3165$ ,  $3048$ ,  $2927$ ,  $1364$ ,  $1243$ ,  $1223$ ,  $1146$ ,  $1115$ ,  $1063$ ,  $937$ ,  $774$   $\text{cm}^{-1}$ . HRMS (FAB $-$ ) Calcd for ( $\text{M}^+$ )  $\text{C}_{21}\text{H}_8\text{F}_{16}$ :  $564.0370$ , Found  $564.0394$ .

### **9-(Heptadecafluorooctyl)-10-(trifluoromethyl)anthracene (6aC)**

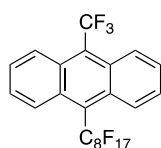

Yield: 74% (yellow powder). M.P.  $114 - 116$   $^{\circ}\text{C}$ .  $^1\text{H}$  NMR ( $\text{CDCl}_3$ )  $\delta$   $7.55 - 7.65$  (m, 4H),  $8.32 - 8.45$  (m, 2H),  $8.46 - 8.57$  (m, 2H).  $^{19}\text{F}$  NMR ( $\text{CDCl}_3$ )  $\delta$   $-49.65$  (s, 3F),  $-81.97$  (t,  $J = 9.0$  Hz, 3F),  $-92.91$  (t,  $J = 16.1$  Hz, 2F),  $-118.46$  (m, 2F),  $-122.52$  to  $-123.04$  (m, 6F),  $-123.88$  (brs, 2F),  $-127.33$  (m, 2F).  $^{13}\text{C}$  NMR ( $\text{CDCl}_3$ )  $\delta$   $124.7$  (q,  $J = 8.0$  Hz),  $125.4$  (tt,  $J = 9.4$ ,  $5.0$  Hz),  $125.5$  (q,  $J = 277.9$  Hz),  $125.8$ ,  $126.3$ ,  $126.8$ ,  $127.2$ ,  $129.3$ ,  $131.0$ . IR (KBr)  $\nu$   $3156$ ,  $3098$ ,  $3051$ ,  $1446$ ,  $1368$ ,  $1241$ ,  $1148$ ,  $990$ ,  $766$   $\text{cm}^{-1}$ . HRMS (FAB $-$ ) Calcd for ( $\text{M}^+$ )  $\text{C}_{23}\text{H}_8\text{F}_{20}$ :  $664.0307$ , Found  $664.0336$ .

### **9-(Henicosafuorodecyl)-10-(trifluoromethyl)anthracene (6aD)**

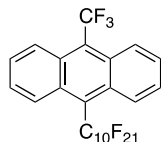

Yield: 87% (yellow powder). M.P.  $115 - 117$   $^{\circ}\text{C}$ .  $^1\text{H}$  NMR ( $\text{CDCl}_3$ )  $\delta$   $7.57 - 7.65$  (m, 4H),  $8.35 - 8.45$  (m, 2H),  $8.48 - 8.55$  (m, 2H).  $^{19}\text{F}$  NMR ( $\text{CDCl}_3$ )  $\delta$   $-49.65$  (s, 3F),  $-81.98$  (t,  $J = 9.0$  Hz, 3F),  $-92.91$  (t,  $J = 15.8$  Hz, 2F),  $-118.46$  (m, 2F),  $-122.25$  to  $-123.22$  (m, 10F),  $-123.94$  (m, 2F),  $-127.34$  (m, 2F).  $^{13}\text{C}$  NMR ( $\text{CDCl}_3$ )  $\delta$   $124.7$  (q,  $J = 5.6$  Hz),  $125.4$  (tt,  $J = 10.0$ ,  $4.4$  Hz),  $125.5$  (q,  $J = 276.7$  Hz),  $125.8$ ,  $126.4$ ,  $126.8$ ,  $127.2$ ,  $129.3$ ,  $130.9$ . IR (KBr)  $\nu$   $3098$ ,  $3075$ ,  $3048$ ,  $1340$ ,  $1215$ ,  $1153$ ,  $1115$ ,  $917$ ,  $841$ ,  $776$   $\text{cm}^{-1}$ . HRMS (FAB $-$ ) Calcd for ( $\text{M}^+$ )  $\text{C}_{25}\text{H}_8\text{F}_{24}$ :  $764.0243$ , Found  $764.0210$ .

<sup>1</sup> Coleman, R. S.; Mortensen, M. A. *Tetrahedron Lett.* **2003**, *44*, 1215-1219.

<sup>2</sup> Ghosh, T.; Hart, H. *J. Org. Chem.* **1987**, *53*, 3555-3558.

<sup>3</sup> Stone, M. T.; Anderson, H. L. *Chem. Commun.* **2007**, *23*, 2387-2389.

<sup>4</sup> (a) Stahly, G. P.; Bell, D. R. *J. Org. Chem.* **1989**, *54*, 2873-2877; (b) Singh, R. P.; Shreeve, J. M. *J. Fluorine Chem.* **2012**, *133*, 20-26.

<sup>5</sup> Kim, T.-Y.; Kumar, S. *J. Org. Chem.* **2000**, *65*, 3883-3884.

<sup>6</sup> Toyota, M.; Komori, C.; Ihara, M. *J. Org. Chem.* **2000**, *65*, 7110-7113.
